# Supplementary material
Source: PubMed Central journal article supplement (PMC4152795)
Supplement: Supp_Table1.pdf [file Supp_Table1.pdf]

| Transcripts Cluster Id | p (Corr) | p        | Regulation | Fold Change | Log FC   | Average expression B6 | Average expression MRL | genesymbol      | entrezgene | genesdescription                                                                                                  |
|------------------------|----------|----------|------------|-------------|----------|-----------------------|------------------------|-----------------|------------|-------------------------------------------------------------------------------------------------------------------|
| 10504164               | 3.62E-04 | 2.47E-08 | down       | -7.25399    | -2.85878 | 952.3529              | 6902.74                | Ccl27a Gm20301  | 10         | chemokine (C-C motif) ligand 27A   predicted gene 13306                                                           |
| 10504194               | 3.62E-04 | 2.51E-08 | down       | -7.25387    | -2.85875 | 952.4516              | 6903.215               | Ccl27a Gm20301  | 10         | chemokine (C-C motif) ligand 27A   predicted gene 13306                                                           |
| 10365769               | 5.21E-04 | 1.54E-07 | down       | -6.80358    | -2.76629 | 63.81808              | 435.2295               | Hal             | 15109      | histidine ammonia lyase                                                                                           |
| 10419568               | 5.21E-04 | 8.75E-08 | down       | -13.6116    | -3.76677 | 77.95621              | 1059.322               | Ear11           | 93726      | eosinophil-associated, ribonuclease A family, member 11                                                           |
| 10439651               | 5.21E-04 | 1.69E-07 | down       | -9.17102    | -3.19708 | 90.6681               | 829.2231               | Cd200           | 17470      | CD200 antigen                                                                                                     |
| 10448916               | 5.21E-04 | 1.32E-07 | down       | -12.3478    | -3.62618 | 84.02135              | 1037.634               | Tpsab1          | 17230      | tryptase alpha/beta 1                                                                                             |
| 10499935               | 5.21E-04 | 1.27E-07 | up         | 4.207304    | 2.072896 | 1776.557              | 422.4203               | Lce1i           | 76585      | late cornified envelope 1l                                                                                        |
| 10508800               | 5.21E-04 | 1.81E-07 | up         | 8.671551    | 3.11629  | 923.8954              | 105.9365               | LOC433762       | 433762     |                                                                                                                   |
| 10512315               | 5.21E-04 | 1.79E-07 | down       | -5.61311    | -2.4888  | 446.4913              | 2499.513               | Ccl27a Gm20301  | 10         | chemokine (C-C motif) ligand 27A   predicted gene 13306   RIKEN cDNA 1700008B15 gene   predicted gene 2438        |
| 10573865               | 5.21E-04 | 1.80E-07 | up         | 8.693842    | 3.119994 | 923.2285              | 105.5923               | LOC433762       | 433762     |                                                                                                                   |
| 10421186               | 5.45E-04 | 2.08E-07 | up         | 5.301896    | 2.406508 | 256.9292              | 48.33885               | Gm10002         | 791405     | predicted gene 10002                                                                                              |
| 10510580               | 6.85E-04 | 3.04E-07 | up         | 6.851568    | 2.776434 | 1118.219              | 162.3253               | Tnfrsf9         | 21942      | tumor necrosis factor receptor superfamily, member 9                                                              |
| 10584572               | 6.85E-04 | 3.09E-07 | up         | 3.334472    | 1.737458 | 11804.29              | 3540.624               | Hspa8           | 15481      | heat shock protein 8                                                                                              |
| 10432897               | 7.78E-04 | 3.78E-07 | down       | -6.06776    | -2.60116 | 291.5023              | 1763.882               | Krt79           | 223917     | keratin 79                                                                                                        |
| 10372648               | 8.03E-04 | 4.18E-07 | down       | -3.34918    | -1.74381 | 805.7399              | 2696.809               | Lyz2            | 17105      | lysozyme 2                                                                                                        |
| 10415081               | 8.52E-04 | 5.71E-07 | down       | -3.86826    | -1.95169 | 52.85723              | 204.3319               | EG665955        | 665955     |                                                                                                                   |
| 10466712               | 8.52E-04 | 5.24E-07 | up         | 10.3398     | 3.370137 | 688.0851              | 65.7795                | Mamdc2          | 71738      | MAM domain containing 2                                                                                           |
| 10520121               | 8.52E-04 | 5.28E-07 | down       | -3.88186    | -1.95675 | 53.01575              | 205.6533               | EG665955        | 665955     |                                                                                                                   |
| 10578405               | 8.52E-04 | 5.91E-07 | down       | -3.87543    | -1.95436 | 52.91244              | 204.8959               | EG665955        | 665955     |                                                                                                                   |
| 10586076               | 8.52E-04 | 5.74E-07 | down       | -3.87857    | -1.95552 | 52.89587              | 205.0295               | EG665955        | 665955     |                                                                                                                   |
| 10490923               | 8.80E-04 | 6.53E-07 | down       | -4.4025     | -2.13832 | 84.49819              | 373.2215               | Car2            | 12349      | carbonic anhydrase 2                                                                                              |
| 10584435               | 8.80E-04 | 6.72E-07 | down       | -2.96773    | -1.56936 | 768.2622              | 2278.745               | Vwa5a           | 67776      | von Willebrand factor A domain containing 5A                                                                      |
| 10469774               | 9.62E-04 | 7.68E-07 | down       | -2.93917    | -1.55541 | 167.3408              | 492.0131               | Il1f8           | 69677      | interleukin 1 family, member 8                                                                                    |
| 10407435               | 0.001035 | 8.93E-07 | down       | -8.57547    | -3.10022 | 112.0744              | 965.7035               | Akr1c18         | 105349     | aldo-keto reductase family 1, member C18                                                                          |
| 10444780               | 0.001035 | 8.98E-07 | up         | 7.377561    | 2.883144 | 3795.815              | 516.0573               | H2-D1 H2-14964  | 14         | histocompatibility 2, D region locus 1                                                                            |
| 10384458               | 0.001212 | 1.09E-06 | down       | -4.22495    | -2.07893 | 191.7961              | 806.7989               | Plek            | 56193      | pleckstrin                                                                                                        |
| 10493905               | 0.0014   | 1.36E-06 | up         | 7.394135    | 2.886381 | 547.5425              | 73.20709               |                 |            |                                                                                                                   |
| 10541753               | 0.0014   | 1.32E-06 | down       | -3.43669    | -1.78102 | 112.2873              | 386.5712               | C5300280C       | 319352     | RIKEN cDNA C530028021 gene                                                                                        |
| 10352267               | 0.001448 | 1.51E-06 | down       | -2.46186    | -1.29975 | 134.4251              | 330.8753               | Lin9            | 72568      | lin-9 homolog (C. elegans)                                                                                        |
| 10551264               | 0.001448 | 1.51E-06 | down       | -10.8907    | -3.44502 | 130.9563              | 1402.836               | Cyp2b19         | 13090      | cytochrome P450, family 2, subfamily b, polypeptide 19                                                            |
| 10351504               | 0.001624 | 1.80E-06 | up         | 3.073955    | 1.620096 | 1316.331              | 427.2271               | EG665955        | 665955     |                                                                                                                   |
| 10550650               | 0.001624 | 1.80E-06 | down       | -2.73925    | -1.45378 | 913.4891              | 2503.939               | Ercc1           | 13870      | excision repair cross-complementing rodent repair deficiency, complementation group 1                             |
| 10499909               | 0.001709 | 2.05E-06 | down       | -2.54044    | -1.34508 | 189.0926              | 480.2234               | Lce6a           | 78382      | late cornified envelope 6A                                                                                        |
| 10502196               | 0.001709 | 2.04E-06 | up         | 3.171693    | 1.665253 | 709.2014              | 223.7146               | Rpl34           | 68436      | ribosomal protein L34                                                                                             |
| 10539135               | 0.001709 | 2.08E-06 | up         | 2.572144    | 1.362971 | 1792.179              | 696.9216               | Capg            | 12332      | capping protein (actin filament), gelsolin-like                                                                   |
| 10592266               | 0.001743 | 2.18E-06 | down       | -2.43698    | -1.2851  | 103.1609              | 251.3974               | Slc37a2         | 56857      | solute carrier family 37 (glycerol-3-phosphate transporter), member 2                                             |
| 10444459               | 0.001929 | 2.52E-06 | down       | -2.52987    | -1.33906 | 135.6229              | 343.1412               | Tnxb            | 81877      | tenascin XB                                                                                                       |
| 10510221               | 0.001929 | 2.54E-06 | up         | 2.786674    | 1.478544 | 196.1733              | 70.25885               | LOC433762       | 433762     |                                                                                                                   |
| 10572591               | 0.002097 | 2.84E-06 | down       | -2.70263    | -1.43437 | 151.3158              | 409.5728               | Ocel1           | 77090      | occludin/ELL domain containing 1                                                                                  |
| 10598794               | 0.002176 | 3.02E-06 | down       | -3.6254     | -1.85814 | 246.131               | 888.0271               |                 |            |                                                                                                                   |
| 10528207               | 0.002193 | 3.12E-06 | down       | -2.43923    | -1.28643 | 932.5074              | 2272.262               | Cd36            | 12491      | CD36 antigen                                                                                                      |
| 10425822               | 0.002209 | 3.22E-06 | down       | -3.886      | -1.95828 | 148.4254              | 573.3731               | Pnpla3          | 116939     | patatin-like phospholipase domain containing 3                                                                    |
| 10459496               | 0.00254  | 3.88E-06 | up         | 2.691487    | 1.428403 | 645.9241              | 239.4278               | Ccbe1           | 320924     | collagen and calcium binding EGF domains 1                                                                        |
| 10480275               | 0.00254  | 3.84E-06 | down       | -2.77114    | -1.47048 | 208.1824              | 576.6094               | Neb1            | 74103      | nebulin                                                                                                           |
| 10580469               | 0.002656 | 4.15E-06 | down       | -2.27982    | -1.18892 | 169.5831              | 386.9246               | Cbln1           | 12404      | cerebellin 1 precursor protein                                                                                    |
| 10412394               | 0.002692 | 4.40E-06 | down       | -2.35465    | -1.23551 | 237.0551              | 558.8286               | Nnt             | 18115      | nicotinamide nucleotide transhydrogenase                                                                          |
| 10502156               | 0.002692 | 4.48E-06 | up         | 2.733702    | 1.450856 | 218.7733              | 80.15046               | Ccdc109b        | 66815      | coiled-coil domain containing 109B                                                                                |
| 10569618               | 0.002692 | 4.48E-06 | down       | -2.50014    | -1.32201 | 100.0566              | 249.8848               | Ano1            | 101772     | anoctamin 1, calcium activated chloride channel                                                                   |
| 10489569               | 0.00278  | 4.92E-06 | down       | -2.05665    | -1.0403  | 332.1082              | 683.0921               | Pltp Ctsa       | 18830      | 19 phospholipid transfer protein   cathepsin A                                                                    |
| 10493903               | 0.00278  | 4.73E-06 | up         | 3.68495     | 1.881645 | 7004.433              | 1892.649               | Lce3c Lce394060 | 54         | late cornified envelope 3C   late cornified envelope 3A   late cornified envelope 3F   late cornified envelope 3B |
| 10568731               | 0.00278  | 4.84E-06 | down       | -4.49827    | -2.16937 | 62.58948              | 279.1684               |                 |            |                                                                                                                   |
| 10394776               | 0.002919 | 5.27E-06 | up         | 2.179468    | 1.123976 | 739.0707              | 339.3437               |                 |            |                                                                                                                   |
| 10565255               | 0.002985 | 5.49E-06 | up         | 2.346432    | 1.230469 | 1256.794              | 535.5091               | 9930013L2       | 80982      | RIKEN cDNA 9930013L23 gene                                                                                        |
| 10573910               | 0.003034 | 5.68E-06 | down       | -2.32311    | -1.21606 | 295.8131              | 687.9241               | Irx5            | 54352      | Iroquois related homeobox 5 (Drosophila)                                                                          |
| 10494271               | 0.00305  | 5.82E-06 | down       | -2.00353    | -1.00255 | 376.6377              | 754.6416               | Ctsa            | 13040      | cathepsin S                                                                                                       |
| 10385325               | 0.003094 | 6.42E-06 | up         | 3.059395    | 1.613246 | 573.4376              | 186.4922               | Pttg1           | 30939      | pituitary tumor-transforming gene 1                                                                               |
| 10418198               | 0.003094 | 6.44E-06 | up         | 2.15996     | 1.111004 | 1932.175              | 894.1013               | D14Ert444:66039 | 10         | DNA segment, Chr 14, ERATO Doi 449, expressed   predicted gene 10395                                              |

|          |          |          |      |          |          |          |          |                             |                                                                                                     |
|----------|----------|----------|------|----------|----------|----------|----------|-----------------------------|-----------------------------------------------------------------------------------------------------|
| 10439732 | 0.003094 | 6.29E-06 | up   | 2.712126 | 1.439424 | 673.1559 | 249.063  | Plcx2                       | 433022 phosphatidylinositol-specific phospholipase C, X domain containing 2                         |
| 10493900 | 0.003094 | 6.03E-06 | up   | 3.65185  | 1.868627 | 8489.123 | 2323.472 | Lce3c                       | 94060 late cornified envelope 3C                                                                    |
| 10595803 | 0.003094 | 6.16E-06 | up   | 4.226502 | 2.079464 | 456.3539 | 109.0878 | Rnf7                        | 19823 ring finger protein 7                                                                         |
| 10418185 | 0.003153 | 6.70E-06 | up   | 2.145387 | 1.101238 | 1927.703 | 898.1673 | D14Ertdd44 <sup>66039</sup> | 10 DNA segment, Chr 14, ERATO Doi 449, expressed   predicted gene 10395                             |
| 10418210 | 0.003153 | 6.96E-06 | up   | 2.161244 | 1.111862 | 1748.243 | 808.5557 | D14Ertdd44 <sup>66039</sup> | 10 DNA segment, Chr 14, ERATO Doi 449, expressed   predicted gene 10395                             |
| 10511353 | 0.003153 | 6.99E-06 | down | -2.89644 | -1.53428 | 195.1562 | 563.3076 | Sdr16c6                     | 242286 short chain dehydrogenase/reductase family 16C, member 6                                     |
| 10588043 | 0.003153 | 7.00E-06 | down | -4.01007 | -2.00363 | 415.6528 | 1665.519 | Rbp2                        | 19660 retinol binding protein 2, cellular                                                           |
| 10384223 | 0.003258 | 7.36E-06 | down | -1.992   | -0.99422 | 1668.48  | 3323.577 | Igfbp3                      | 16009 insulin-like growth factor binding protein 3                                                  |
| 10405566 | 0.003258 | 7.85E-06 | down | -2.00196 | -1.00141 | 168.4088 | 337.1515 | AU042651                    | 328258                                                                                              |
| 10423049 | 0.003258 | 7.68E-06 | down | -2.63398 | -1.39725 | 76.48405 | 200.8523 | Prlr                        | 19116 prolactin receptor                                                                            |
| 10496438 | 0.003258 | 7.91E-06 | down | -2.35386 | -1.23503 | 177.366  | 418.3948 | Adh1                        | 11522 alcohol dehydrogenase 1 (class I)                                                             |
| 10529485 | 0.003258 | 7.79E-06 | down | -2.24609 | -1.16742 | 380.2815 | 853.1252 | Htra3                       | 78558 HtrA serine peptidase 3                                                                       |
| 10571840 | 0.003258 | 7.56E-06 | down | -2.51755 | -1.33202 | 168.044  | 424.2941 | Hpgd                        | 15446 hydroxyprostaglandin dehydrogenase 15 (NAD)                                                   |
| 10378787 | 0.003404 | 8.50E-06 | down | -2.7735  | -1.47171 | 233.7111 | 645.5581 | Tusc5                       | 237858 tumor suppressor candidate 5                                                                 |
| 10498584 | 0.003404 | 8.40E-06 | down | -2.10584 | -1.0744  | 73.32475 | 154.287  | Rarres1                     | 109222 retinoic acid receptor responder (tazarotene induced) 1                                      |
| 10469358 | 0.00344  | 8.71E-06 | down | -2.16053 | -1.11138 | 82.92863 | 179.1292 | Mrc1                        | 17533 mannose receptor, C type 1                                                                    |
| 10576152 | 0.003511 | 9.02E-06 | down | -2.23522 | -1.16042 | 849.6195 | 1902.431 | Trappc2l                    | 59005 trafficking protein particle complex 2-like                                                   |
| 10375121 | 0.003581 | 9.32E-06 | up   | 3.30874  | 1.726282 | 6145.405 | 1845.532 | C530030PC                   | 97730 RIKEN cDNA C530030P08 gene                                                                    |
| 10349968 | 0.003634 | 9.71E-06 | down | -5.31941 | -2.41127 | 176.8878 | 944.2849 | Chi3l1                      | 12654 chitinase 3-like 1                                                                            |
| 10439895 | 0.003634 | 9.67E-06 | down | -1.90089 | -0.92668 | 682.8355 | 1298.127 | Alcam                       | 11658 activated leukocyte cell adhesion molecule                                                    |
| 10547807 | 0.003696 | 1.00E-05 | down | -3.45797 | -1.78993 | 284.8925 | 983.9302 | Eno2                        | 13807 enolase 2, gamma neuronal                                                                     |
| 10351491 | 0.003744 | 1.04E-05 | down | -2.59534 | -1.37593 | 560.5433 | 1449.524 | Olfml2b                     | 320078 olfactomedin-like 2B                                                                         |
| 10418193 | 0.003744 | 1.03E-05 | up   | 1.906539 | 0.930956 | 252.574  | 132.4917 | Plac9                       | 211623 placenta specific 9                                                                          |
| 10350630 | 0.003778 | 1.06E-05 | up   | 1.99464  | 0.996128 | 1079.418 | 540.9371 | Fam129a                     | 63913 family with sequence similarity 129, member A                                                 |
| 10408693 | 0.003871 | 1.10E-05 | down | -3.5509  | -1.82819 | 120.1875 | 423.2235 | F13a1                       | 74145 coagulation factor XIII, A1 subunit                                                           |
| 10400109 | 0.003873 | 1.21E-05 | up   | 2.063753 | 1.04527  | 272.1617 | 131.9559 | Zfp277                      | 246196 zinc finger protein 277                                                                      |
| 10407467 | 0.003873 | 1.22E-05 | up   | 2.785354 | 1.477861 | 244.422  | 88.16687 | Akr1e1                      | 56043 aldo-keto reductase family 1, member E1                                                       |
| 10414262 | 0.003873 | 1.14E-05 | down | -3.43632 | -1.78087 | 66.4525  | 227.3367 | Ear2                        | 13587 eosinophil-associated, ribonuclease A family, member 2                                        |
| 10418180 | 0.003873 | 1.19E-05 | up   | 1.884558 | 0.914227 | 261.1652 | 138.6005 | Plac9                       | 211623 placenta specific 9                                                                          |
| 10418205 | 0.003873 | 1.20E-05 | up   | 1.883611 | 0.913501 | 260.5262 | 138.3314 | Plac9                       | 211623 placenta specific 9                                                                          |
| 10449356 | 0.003873 | 1.17E-05 | down | -2.3117  | -1.20895 | 252.8239 | 582.9562 | Al413582                    | 106672                                                                                              |
| 10467153 | 0.003873 | 1.12E-05 | down | -2.15986 | -1.11094 | 84.22523 | 181.6505 | Slc16a12                    | 240638 solute carrier family 16 (monocarboxylic acid transporters), member 12                       |
| 10522335 | 0.003873 | 1.22E-05 | down | -2.76863 | -1.46917 | 202.8869 | 563.0496 | Atp10d                      | 231287 ATPase, class V, type 10D                                                                    |
| 10587655 | 0.003873 | 1.19E-05 | down | -1.92121 | -0.94202 | 98.86994 | 189.9837 | 493042210                   | 71640 RIKEN cDNA 4930422107 gene                                                                    |
| 10379866 | 0.003905 | 1.35E-05 | down | -3.03124 | -1.59991 | 122.1368 | 371.4811 | Car4                        | 12351 carbonic anhydrase 4                                                                          |
| 10395155 | 0.003905 | 1.31E-05 | down | -2.08614 | -1.06084 | 172.7677 | 360.331  | Fam110c                     | 104943 family with sequence similarity 110, member C                                                |
| 10400006 | 0.003905 | 1.34E-05 | down | -2.07232 | -1.05125 | 777.1364 | 1612.479 | Ahr                         | 11622 aryl-hydrocarbon receptor                                                                     |
| 10401114 | 0.003905 | 1.28E-05 | down | -1.88035 | -0.911   | 188.1519 | 353.7452 | Rab15                       | 104886 RAB15, member RAS oncogene family                                                            |
| 10423030 | 0.003905 | 1.37E-05 | down | -1.888   | -0.91686 | 71.84295 | 135.5828 | Prlr                        | 19116 prolactin receptor                                                                            |
| 10428857 | 0.003905 | 1.25E-05 | down | -2.40665 | -1.26702 | 222.3626 | 534.5234 | Mtss1                       | 211401 metastasis suppressor 1                                                                      |
| 10499939 | 0.003905 | 1.36E-05 | up   | 2.096769 | 1.068168 | 3370.577 | 1608.709 | Gm7055                      | 631101 predicted gene 7055                                                                          |
| 10508663 | 0.003905 | 1.35E-05 | down | -2.16156 | -1.11207 | 416.7069 | 899.0816 | Laptm5                      | 16792 lysosomal-associated protein transmembrane 5                                                  |
| 10547056 | 0.003905 | 1.34E-05 | up   | 1.828427 | 0.870603 | 1850.73  | 1012.228 | Tmem40                      | 94346 transmembrane protein 40                                                                      |
| 10601088 | 0.003905 | 1.29E-05 | down | -2.88506 | -1.5286  | 132.0234 | 382.3726 | Gm9078                      | 668271 predicted gene 9078                                                                          |
| 10375123 | 0.00401  | 1.42E-05 | up   | 3.385641 | 1.759429 | 5371.39  | 1576.11  | C530030PC                   | 97730 RIKEN cDNA C530030P08 gene                                                                    |
| 10466200 | 0.004156 | 1.49E-05 | down | -2.62823 | -1.39409 | 76.86017 | 200.9741 | Ms4a7                       | 109225 membrane-spanning 4-domains, subfamily A, member 7                                           |
| 10446739 | 0.004195 | 1.51E-05 | down | -2.17353 | -1.12004 | 662.5613 | 1437.482 | Clp4                        | 78785 CAP-GLY domain containing linker protein family, member 4                                     |
| 10346448 | 0.004209 | 1.55E-05 | down | -2.09627 | -1.06782 | 74.53879 | 155.9661 | Aox4                        | 71872 aldehyde oxidase 4                                                                            |
| 10446713 | 0.004209 | 1.54E-05 | down | -2.29215 | -1.1967  | 323.3979 | 739.2461 | Snord53                     | 1E+08 small nucleolar RNA, C/D box 53                                                               |
| 10463844 | 0.00432  | 1.60E-05 | down | -3.41496 | -1.77187 | 141.6899 | 485.9161 | Gsto2                       | 68214 glutathione S-transferase omega 2                                                             |
| 10406581 | 0.004582 | 1.73E-05 | up   | 2.25076  | 1.170412 | 252.0425 | 111.6388 | Dhfr[Msh3 13361]            | 17 dihydrofolate reductase   mutS homolog 3 (E. coli)                                               |
| 10440522 | 0.004582 | 1.75E-05 | down | -1.91109 | -0.9344  | 2058.874 | 3932.124 | Adamts1                     | 11504 a disintegrin-like and metallopeptidase (reprolysin type) with thrombospondin type 1 motif, 1 |
| 10583112 | 0.004582 | 1.74E-05 | down | -2.24447 | -1.16638 | 93.54936 | 209.3619 | Mmp27                       | 234911 matrix metallopeptidase 27                                                                   |
| 10514347 | 0.004626 | 1.78E-05 | down | -1.77751 | -0.82986 | 245.5999 | 436.545  | Cdkn2b                      | 12579 cyclin-dependent kinase inhibitor 2B (p15, inhibits CDK4)                                     |
| 10530029 | 0.004674 | 1.82E-05 | up   | 1.902078 | 0.927576 | 680.5145 | 357.6835 | Lgi2                        | 246316 leucine-rich repeat LGI family, member 2                                                     |
| 10514956 | 0.004728 | 1.87E-05 | down | -2.10903 | -1.07658 | 147.5996 | 310.6384 | Scp2                        | 20280 sterol carrier protein 2, liver                                                               |
| 10555197 | 0.004728 | 1.87E-05 | down | -1.91627 | -0.9383  | 299.1388 | 572.7074 | Mtap6                       | 17760 microtubule-associated protein 6                                                              |
| 10460468 | 0.004758 | 1.90E-05 | down | -2.01935 | -1.01389 | 344.9997 | 697.6071 | Ctsf                        | 56464 cathepsin F                                                                                   |
| 10455873 | 0.00482  | 1.98E-05 | down | -2.0785  | -1.05554 | 478.4523 | 992.4663 | Slc12a2                     | 20496 solute carrier family 12, member 2                                                            |
| 10507059 | 0.00482  | 1.97E-05 | down | -2.41544 | -1.27228 | 91.35607 | 221.6637 | Skint7                      | 328505 selection and upkeep of intraepithelial T cells 7                                            |
| 10511345 | 0.00482  | 1.99E-05 | down | -3.88286 | -1.95712 | 75.00573 | 289.1764 | Sdr16c5                     | 242285 short chain dehydrogenase/reductase family 16C, member 5                                     |
| 10515220 | 0.00482  | 1.94E-05 | down | -2.85054 | -1.51124 | 184.6335 | 523.5322 | Faah                        | 14073 fatty acid amide hydrolase                                                                    |
| 10427035 | 0.004823 | 2.04E-05 | down | -2.27373 | -1.18506 | 3029.524 | 6877.129 | Nr4a1                       | 15370 nuclear receptor subfamily 4, group A, member 1                                               |
| 10442580 | 0.004823 | 2.02E-05 | up   | 1.818916 | 0.863079 | 7054.224 | 3880.123 | Rps2                        | 16898 ribosomal protein S2                                                                          |
| 10506571 | 0.004823 | 2.04E-05 | down | -1.84672 | -0.88497 | 1855.93  | 3429.395 | Dhcr24                      | 74754 24-dehydrocholesterol reductase                                                               |

|          |          |          |      |          |          |          |          |                  |                                    |                                                                                                                                                      |
|----------|----------|----------|------|----------|----------|----------|----------|------------------|------------------------------------|------------------------------------------------------------------------------------------------------------------------------------------------------|
| 10497451 | 0.004824 | 2.06E-05 | down | -3.39437 | -1.76314 | 128.6757 | 440.8759 | Cpa3             | 12873                              | carboxypeptidase A3, mast cell                                                                                                                       |
| 10400941 | 0.004933 | 2.15E-05 | down | -2.23629 | -1.16111 | 570.5282 | 1275.607 | Dhrs7            | 66375                              | dehydrogenase/reductase (SDR family) member 7                                                                                                        |
| 10409579 | 0.004933 | 2.15E-05 | down | -2.04766 | -1.03397 | 616.2372 | 1259.19  | Cxcl14           | 57266                              | chemokine (C-X-C motif) ligand 14                                                                                                                    |
| 10498168 | 0.004933 | 2.16E-05 | up   | 1.734574 | 0.794582 | 821.5424 | 473.6325 | Exosc8           | 69639                              | exosome component 8                                                                                                                                  |
| 10531724 | 0.004933 | 2.17E-05 | up   | 2.295517 | 1.198819 | 197.5746 | 86.03823 | Plac8            | 231507                             | placenta-specific 8                                                                                                                                  |
| 10394119 | 0.004962 | 2.20E-05 | down | -1.86357 | -0.89807 | 2057.702 | 3836.884 | Zfp750           | 319530                             | zinc finger protein 750                                                                                                                              |
| 10399588 | 0.005004 | 2.24E-05 | up   | 1.761741 | 0.817002 | 104.8701 | 59.51827 | Zfp125           | 22651                              | zinc finger protein 125                                                                                                                              |
| 10399360 | 0.005005 | 2.29E-05 | down | -1.86447 | -0.89877 | 930.5606 | 1734.875 | Rhob             | 11852                              | ras homolog gene family, member B                                                                                                                    |
| 10423825 | 0.005005 | 2.31E-05 | down | -1.83208 | -0.87349 | 475.2285 | 870.7232 | Fzd6             | 14368                              | frizzled homolog 6 (Drosophila)                                                                                                                      |
| 10573430 | 0.005005 | 2.29E-05 | up   | 1.820369 | 0.864231 | 590.3523 | 324.5133 | Gadd45gip        | 102060                             | 1 growth arrest and DNA-damage-inducible, gamma interacting protein 1   RAD23a homolog (S. cerevisiae)                                               |
| 10603066 | 0.005005 | 2.31E-05 | down | -1.83088 | -0.87254 | 50.07396 | 91.74189 | Ace2             | 70008                              | angiotensin I converting enzyme (peptidyl-dipeptidase A) 2                                                                                           |
| 10578264 | 0.005057 | 2.35E-05 | down | -2.01551 | -1.01115 | 242.4615 | 489.5801 | Msr1             | 20288                              | macrophage scavenger receptor 1                                                                                                                      |
| 10544573 | 0.005061 | 2.39E-05 | down | -1.7606  | -0.81607 | 4177.509 | 7356.915 | Rarres2 Lrn      | 71660                              | 24 retinoic acid receptor responder (tazarotene induced) 2   leucine rich repeat containing 61                                                       |
| 10550487 | 0.005061 | 2.38E-05 | down | -3.03212 | -1.60033 | 309.8798 | 932.5256 | Mill1            | 266815                             | MHC I like leukocyte 1                                                                                                                               |
| 10444824 | 0.005399 | 2.57E-05 | up   | 5.099031 | 2.350223 | 942.3573 | 189.1093 | H2-Q6 061        | 110557                             | 6 histocompatibility 2, Q region locus 6   RIKEN cDNA O610037M15 gene                                                                                |
| 10355500 | 0.005415 | 2.59E-05 | up   | 2.488041 | 1.31501  | 1395.901 | 561.3208 | lgbfp5           | 16011                              | insulin-like growth factor binding protein 5                                                                                                         |
| 10373834 | 0.005548 | 2.68E-05 | down | -1.70026 | -0.76575 | 101.8525 | 173.1714 | Sec14l4          | 103655                             | SEC14-like 4 (S. cerevisiae)                                                                                                                         |
| 10446282 | 0.005585 | 2.77E-05 | down | -1.8742  | -0.90627 | 88.31159 | 165.3256 | Emr1             | 13733                              | EGF-like module containing, mucin-like, hormone receptor-like sequence 1                                                                             |
| 10475324 | 0.005585 | 2.77E-05 | down | -2.11991 | -1.08401 | 282.5459 | 599.888  | Ckmt1            | 12716                              | creatine kinase, mitochondrial 1, ubiquitous                                                                                                         |
| 10552480 | 0.005585 | 2.74E-05 | down | -2.22023 | -1.15071 | 174.6504 | 387.3779 | Klk11            | 56538                              | kallikrein related-peptidase 11                                                                                                                      |
| 10583071 | 0.005585 | 2.76E-05 | up   | 1.837143 | 0.877464 | 6653.564 | 3618.224 | Mmp3             | 17392                              | matrix metalloproteinase 3                                                                                                                           |
| 10472155 | 0.005613 | 2.81E-05 | down | -2.64584 | -1.40373 | 64.37485 | 171.1537 | Kcnj3            | 16519                              | potassium inwardly-rectifying channel, subfamily J, member 3                                                                                         |
| 10595840 | 0.005613 | 2.82E-05 | down | -1.88066 | -0.91124 | 133.052  | 250.5586 | Acpl2            | 235534                             | acid phosphatase-like 2                                                                                                                              |
| 10406663 | 0.005615 | 2.86E-05 | up   | 1.804928 | 0.851941 | 783.9442 | 434.4965 | Arsb             | 11881                              | arylsulfatase B                                                                                                                                      |
| 10510399 | 0.005615 | 2.85E-05 | down | -1.71744 | -0.78026 | 66.01973 | 113.3901 | Masp2 Tar        | 17175                              | 23 mannan-binding lectin serine peptidase 2   TAR DNA binding protein                                                                                |
| 10442932 | 0.005635 | 2.89E-05 | down | -1.87976 | -0.91055 | 101.4668 | 190.6235 | Tmem8            | 60455                              | transmembrane protein 8 (five membrane-spanning domains)                                                                                             |
| 10512574 | 0.005667 | 2.95E-05 | up   | 1.796661 | 0.845318 | 417.9823 | 232.5192 | Gba2             | 230101                             | glucosidase beta 2                                                                                                                                   |
| 10583090 | 0.005667 | 2.94E-05 | up   | 2.52622  | 1.33698  | 1379.206 | 547.9342 | Mmp10            | 17384                              | matrix metalloproteinase 10                                                                                                                          |
| 10571344 | 0.0057   | 2.99E-05 | down | -1.98629 | -0.99007 | 436.2532 | 867.9384 | D8Erdt82e        | 244418                             | DNA segment, Chr 8, ERATO Doi 82, expressed                                                                                                          |
| 10360070 | 0.005812 | 3.09E-05 | down | -1.94653 | -0.96091 | 316.5116 | 615.1166 | Fcer1g           | 14127                              | Fc receptor, IgE, high affinity I, gamma polypeptide                                                                                                 |
| 10491699 | 0.005812 | 3.07E-05 | up   | 2.441263 | 1.287628 | 616.4712 | 253.6807 | Fgf2 LOC11       | 14173                              | 10 fibroblast growth factor 2   similar to Heparin-binding growth factor 2 precursor (HBGF-2) (Basic fibroblast growth factor) (BFGF) (Prostatropin) |
| 10516484 | 0.005931 | 3.19E-05 | down | -2.04485 | -1.032   | 976.7542 | 2002.525 | Gjb3             | 14620                              | gap junction protein, beta 3                                                                                                                         |
| 10588701 | 0.005931 | 3.19E-05 | down | -1.71306 | -0.77657 | 183.5216 | 314.2846 | Hyal3            | 109685                             | hyaluronoglucosaminidase 3                                                                                                                           |
| 10474129 | 0.005996 | 3.25E-05 | down | -1.66953 | -0.73944 | 234.1667 | 390.9566 | Pamr1            | 210622                             | peptidase domain containing associated with muscle regeneration 1                                                                                    |
| 10368638 | 0.006067 | 3.33E-05 | down | -2.21098 | -1.14469 | 264.1396 | 582.3003 | Fam26e           | 103511                             | family with sequence similarity 26, member E                                                                                                         |
| 10522411 | 0.006067 | 3.32E-05 | down | -2.21285 | -1.14591 | 562.8341 | 1241.325 | C130090K2        | 231293                             | RIKEN cDNA C130090K23 gene                                                                                                                           |
| 10445061 | 0.006202 | 3.42E-05 | up   | 1.887211 | 0.916255 | 5148.043 | 2726.96  | Rnf39            | 386454                             | ring finger protein 39                                                                                                                               |
| 10530986 | 0.006403 | 3.56E-05 | down | -2.7473  | -1.45801 | 74.10137 | 203.1628 | 9930032O2        | 320454                             | RIKEN cDNA 9930032O22 gene                                                                                                                           |
| 10392834 | 0.006676 | 3.75E-05 | down | -1.66032 | -0.73146 | 188.6492 | 313.2308 | OTTMUSG100043125 | predicted gene, OTTMUSG00000003606 | CMRF-35-like molecule 3                                                                                                                              |
| 10398859 | 0.006676 | 3.76E-05 | up   | 1.951176 | 0.964344 | 875.1865 | 447.7408 | Adssl1           | 11565                              | adenylosuccinate synthetase like 1                                                                                                                   |
| 10533720 | 0.006676 | 3.78E-05 | down | -1.9574  | -0.96894 | 279.8764 | 547.2818 | Niacr1           | 80885                              | niacin receptor 1                                                                                                                                    |
| 10588283 | 0.00681  | 3.92E-05 | up   | 2.042224 | 1.030141 | 189.1907 | 92.6085  | Rab6b            | 270192                             | RAB6B, member RAS oncogene family                                                                                                                    |
| 10590320 | 0.00681  | 3.91E-05 | up   | 1.707149 | 0.771589 | 279.4569 | 163.6502 | Rpl14            | 67115                              | ribosomal protein L14                                                                                                                                |
| 10595871 | 0.00681  | 3.92E-05 | up   | 1.848965 | 0.886718 | 696.6336 | 376.4556 | Cln2             | 64085                              | calsyntenin 2                                                                                                                                        |
| 10345807 | 0.007112 | 4.12E-05 | down | -2.15285 | -1.10625 | 79.40665 | 171.6904 | Il18r1           | 16182                              | interleukin 18 receptor 1                                                                                                                            |
| 10376269 | 0.007201 | 4.22E-05 | up   | 1.650333 | 0.722757 | 434.7251 | 263.4162 | Galnt10          | 171212                             | UDP-N-acetyl-alpha-D-galactosamine:polypeptide N-acetylgalactosaminyltransferase 10                                                                  |
| 10575120 | 0.007201 | 4.20E-05 | down | -1.64341 | -0.71669 | 638.1719 | 1048.888 | Sntb2            | 20650                              | syntrophin, basic 2                                                                                                                                  |
| 10550394 | 0.007444 | 4.39E-05 | down | -1.62854 | -0.70358 | 709.6094 | 1155.583 | Ptgir            | 19222                              | prostaglandin I receptor (IP)                                                                                                                        |
| 10494016 | 0.007524 | 4.47E-05 | down | -2.00166 | -1.00119 | 59.59626 | 119.0209 | Them5            | 66198                              | thioesterase superfamily member 5                                                                                                                    |
| 10440993 | 0.007615 | 4.57E-05 | down | -1.79803 | -0.84641 | 424.2643 | 762.1209 | Rcan1            | 54720                              | regulator of calcineurin 1                                                                                                                           |
| 10592705 | 0.007615 | 4.56E-05 | down | -3.29718 | -1.72123 | 169.2217 | 552.5587 | Pou2f3           | 18988                              | POU domain, class 2, transcription factor 3                                                                                                          |
| 10566366 | 0.007622 | 4.60E-05 | up   | 1.823359 | 0.866599 | 90.02922 | 49.29189 | Al451617         | 209387                             |                                                                                                                                                      |
| 10440344 | 0.007638 | 4.64E-05 | down | -2.12113 | -1.08484 | 243.6154 | 514.4726 | Robo2            | 268902                             | roundabout homolog 2 (Drosophila)                                                                                                                    |
| 10392825 | 0.007674 | 4.80E-05 | down | -1.70111 | -0.76648 | 209.4769 | 356.1437 | OTTMUSG100043125 | predicted gene, OTTMUSG00000003606 | CMRF-35-like molecule 3                                                                                                                              |
| 10404439 | 0.007674 | 4.97E-05 | down | -1.66292 | -0.73372 | 107.9551 | 179.5386 | Serpinh9b        | 20706                              | serine (or cysteine) peptidase inhibitor, clade B, member 9b                                                                                         |
| 10432661 | 0.007674 | 4.98E-05 | down | -1.86076 | -0.89589 | 98.68674 | 183.7936 | Galnt6           | 207839                             | UDP-N-acetyl-alpha-D-galactosamine:polypeptide N-acetylgalactosaminyltransferase 6                                                                   |
| 10447594 | 0.007674 | 4.97E-05 | down | -1.64085 | -0.71444 | 4892.648 | 8025.948 | Dynl1            | 21648                              | dynein light chain Tctex-type 1                                                                                                                      |
| 10461721 | 0.007674 | 4.90E-05 | down | -1.86509 | -0.89925 | 130.1513 | 242.5767 | Mpeg1            | 17476                              | macrophage expressed gene 1                                                                                                                          |
| 10472050 | 0.007674 | 4.94E-05 | down | -2.22088 | -1.15113 | 1120.505 | 2479.1   | Tnfrsf6          | 21930                              | tumor necrosis factor alpha induced protein 6                                                                                                        |
| 10472538 | 0.007674 | 4.96E-05 | down | -1.67126 | -0.74094 | 66.85464 | 111.6846 | Dhrs9            | 241452                             | dehydrogenase/reductase (SDR family) member 9                                                                                                        |
| 10498972 | 0.007674 | 4.71E-05 | down | -1.93738 | -0.9541  | 74.91068 | 145.2884 | Rbm46            | 633285                             | RNA binding motif protein 46                                                                                                                         |
| 10502805 | 0.007674 | 4.82E-05 | down | -1.64739 | -0.72018 | 739.0151 | 1217.091 | Ptgir            | 19220                              | prostaglandin F receptor                                                                                                                             |
| 10520452 | 0.007674 | 4.94E-05 | down | -2.04513 | -1.03219 | 524.7877 | 1069.237 | Il6              | 16193                              | interleukin 6                                                                                                                                        |
| 10542395 | 0.007674 | 4.80E-05 | up   | 1.834332 | 0.875255 | 211.7689 | 115.5512 | Atf7ip           | 54343                              | activating transcription factor 7 interacting protein                                                                                                |
| 10595953 | 0.007674 | 4.73E-05 | up   | 2.338262 | 1.225437 | 908.3716 | 388.2633 | Esyt3            | 272636                             | extended synaptotagmin-like protein 3                                                                                                                |

|          |          |          |      |          |          |          |          |                                                                                                                                          |                                                                                                                     |
|----------|----------|----------|------|----------|----------|----------|----------|------------------------------------------------------------------------------------------------------------------------------------------|---------------------------------------------------------------------------------------------------------------------|
| 10440238 | 0.007816 | 5.13E-05 | up   | 2.105888 | 1.074429 | 588.9935 | 279.1187 | Nsun3                                                                                                                                    | 106338 NOL1/NOP2/Sun domain family member 3                                                                         |
| 10601588 | 0.007816 | 5.11E-05 | up   | 1.625408 | 0.700802 | 78.97044 | 48.59161 | 3110007F1 73061   62 RIKEN cDNA 3110007F17 gene   predicted gene 6604   predicted gene 5167   predicted gene 2411                        |                                                                                                                     |
| 10379535 | 0.007862 | 5.18E-05 | down | -2.07378 | -1.05226 | 112.9625 | 233.8982 | Ccl8                                                                                                                                     | 20307 chemokine (C-C motif) ligand 8                                                                                |
| 10411668 | 0.00792  | 5.27E-05 | down | -1.70728 | -0.7717  | 203.838  | 347.8715 | Ocln                                                                                                                                     | 18260 occludin                                                                                                      |
| 10499927 | 0.00792  | 5.28E-05 | up   | 2.146014 | 1.101659 | 415.2496 | 193.2898 | Lce1f                                                                                                                                    | 67828 late cornified envelope 1F                                                                                    |
| 10397346 | 0.007953 | 5.41E-05 | down | -2.54482 | -1.34756 | 377.8899 | 966.3014 | Fos                                                                                                                                      | 14281 FBJ osteosarcoma oncogene                                                                                     |
| 10481627 | 0.007953 | 5.33E-05 | up   | 1.62709  | 0.702294 | 6663.799 | 4096.515 | Lcn2                                                                                                                                     | 16819 lipocalin 2                                                                                                   |
| 10512279 | 0.007953 | 5.40E-05 | down | -3.31681 | -1.7298  | 274.556  | 897.5313 | Cntfr                                                                                                                                    | 12804 ciliary neurotrophic factor receptor                                                                          |
| 10593024 | 0.007953 | 5.38E-05 | down | -1.96121 | -0.97174 | 119.7479 | 235.5267 | Cd3e                                                                                                                                     | 12501 CD3 antigen, epsilon polypeptide                                                                              |
| 10502881 | 0.0081   | 5.54E-05 | down | -1.61657 | -0.69293 | 87.08275 | 140.7935 | St6galnac5                                                                                                                               | 26938 ST6 (alpha-N-acetyl-neuraminyl-2,3-beta-galactosyl-1,3)-N-acetylgalactosaminide alpha-2,6-sialyltransferase 5 |
| 10437151 | 0.008111 | 5.62E-05 | down | -1.84867 | -0.88649 | 163.04   | 301.897  | Kcnj15                                                                                                                                   | 16516 potassium inwardly-rectifying channel, subfamily J, member 15                                                 |
| 10502949 | 0.008111 | 5.63E-05 | down | -1.7811  | -0.83277 | 265.714  | 473.3729 |                                                                                                                                          |                                                                                                                     |
| 10573939 | 0.008111 | 5.63E-05 | down | -1.83149 | -0.87302 | 644.7298 | 1178.43  | Lpcat2                                                                                                                                   | 270084 lysophosphatidylcholine acyltransferase 2                                                                    |
| 10580160 | 0.008129 | 5.67E-05 | up   | 1.702585 | 0.767727 | 451.3322 | 265.3057 | Mri1                                                                                                                                     | 67873 methylthioribose-1-phosphate isomerase homolog (S. cerevisiae)                                                |
| 10500736 | 0.008386 | 5.88E-05 | down | -1.65466 | -0.72654 | 425.6407 | 703.9056 | Vangl1                                                                                                                                   | 229658 vang-like 1 (van gogh, Drosophila)                                                                           |
| 10511779 | 0.008402 | 5.92E-05 | down | -1.8001  | -0.84808 | 109.5943 | 197.2245 | Atp6v0d2                                                                                                                                 | 242341 ATPase, H+ transporting, lysosomal V0 subunit D2                                                             |
| 10530615 | 0.008441 | 5.98E-05 | down | -1.94246 | -0.95788 | 119.8516 | 232.2446 | Ociad2                                                                                                                                   | 433904 OCIA domain containing 2                                                                                     |
| 10399555 | 0.008573 | 6.16E-05 | up   | 2.107115 | 1.075269 | 155.285  | 73.32503 | Kcnf1                                                                                                                                    | 382571 potassium voltage-gated channel, subfamily F, member 1                                                       |
| 10462623 | 0.008573 | 6.16E-05 | up   | 2.129386 | 1.090437 | 130.9111 | 61.16066 | Ifit1                                                                                                                                    | 15957 interferon-induced protein with tetratricopeptide repeats 1                                                   |
| 10548785 | 0.008573 | 6.11E-05 | down | -1.63458 | -0.70892 | 4904.553 | 8014.281 | Dynl1t                                                                                                                                   | 21648 dynein light chain Tctex-type 1                                                                               |
| 10358476 | 0.008633 | 6.28E-05 | down | -2.38377 | -1.25324 | 71.85813 | 170.4056 | Prg4                                                                                                                                     | 96875 proteoglycan 4 (megakaryocyte stimulating factor, articular superficial zone protein)                         |
| 10359235 | 0.008633 | 6.25E-05 | down | -1.61225 | -0.68908 | 265.5006 | 428.1159 | Rasal2                                                                                                                                   | 226525 RAS protein activator like 2                                                                                 |
| 10452648 | 0.008633 | 6.34E-05 | down | -1.62603 | -0.70136 | 612.7522 | 996.8001 | Emilin2                                                                                                                                  | 246707 elastin microfibril interfacer 2                                                                             |
| 10551883 | 0.008633 | 6.35E-05 | down | -1.62975 | -0.70465 | 299.0322 | 487.5367 | Tyrobp                                                                                                                                   | 22177 TYRO protein tyrosine kinase binding protein                                                                  |
| 10554800 | 0.008633 | 6.33E-05 | down | -1.63955 | -0.7133  | 165.4917 | 271.4708 | Rab38                                                                                                                                    | 72433 RAB38, member of RAS oncogene family                                                                          |
| 10547657 | 0.008646 | 6.39E-05 | down | -2.0608  | -1.0432  | 393.3294 | 810.4061 | C3ar1                                                                                                                                    | 12267 complement component 3a receptor 1                                                                            |
| 10373702 | 0.008838 | 6.56E-05 | up   | 1.610557 | 0.68756  | 323.4736 | 200.9123 | Pisd-ps1   Pi 236604   6 phosphatidylserine decarboxylase, pseudogene 1   phosphatidylserine decarboxylase, pseudogene 3                 |                                                                                                                     |
| 10464084 | 0.008905 | 6.64E-05 | down | -1.61002 | -0.68708 | 581.2135 | 935.544  | Tcf7l2                                                                                                                                   | 21416 transcription factor 7-like 2, T-cell specific, HMG-box                                                       |
| 10411082 | 0.008909 | 6.68E-05 | down | -2.06651 | -1.0472  | 1521.534 | 3157.135 | Thbs4                                                                                                                                    | 21828 thrombospondin 4                                                                                              |
| 10414065 | 0.008911 | 6.74E-05 | down | -1.61337 | -0.69008 | 2396.458 | 3866.108 | Anxa8                                                                                                                                    | 11752 annexin A8                                                                                                    |
| 10428089 | 0.008911 | 6.73E-05 | down | -3.07592 | -1.62102 | 162.7751 | 493.0064 | Nipal2                                                                                                                                   | 223473 NIPA-like domain containing 2                                                                                |
| 10584604 | 0.009139 | 6.95E-05 | down | -1.58605 | -0.66544 | 4806.309 | 7621.479 | Trim29                                                                                                                                   | 72169 tripartite motif-containing 29                                                                                |
| 10347036 | 0.00916  | 6.99E-05 | down | -2.08182 | -1.05785 | 90.65149 | 187.8066 | Mtap2                                                                                                                                    | 17756 microtubule-associated protein 2                                                                              |
| 10513008 | 0.009204 | 7.06E-05 | down | -1.63266 | -0.70722 | 877.5335 | 1433.348 | Klf4                                                                                                                                     | 16600 Kruppel-like factor 4 (gut)                                                                                   |
| 10439881 | 0.009292 | 7.22E-05 | up   | 2.455063 | 1.29576  | 592.1352 | 241.8256 | 5330426P1                                                                                                                                | 68190 RIKEN cDNA 5330426P16 gene                                                                                    |
| 10458960 | 0.009292 | 7.17E-05 | up   | 1.582537 | 0.66224  | 774.4233 | 489.456  | Aldh7a1                                                                                                                                  | 110695 aldehyde dehydrogenase family 7, member A1                                                                   |
| 10591806 | 0.009292 | 7.22E-05 | up   | 1.578221 | 0.658299 | 338.9061 | 214.778  | rp9                                                                                                                                      | 55934 retinitis pigmentosa 9 (human)                                                                                |
| 10405918 | 0.009455 | 7.38E-05 | up   | 2.162656 | 1.112804 | 233.0924 | 108.0428 | Rsl1                                                                                                                                     | 380855 regulator of sex limited protein 1                                                                           |
| 10411454 | 0.009531 | 7.51E-05 | down | -2.20589 | -1.14136 | 407.3042 | 898.1632 | Sec61b                                                                                                                                   | 66212 Sec61 beta subunit                                                                                            |
| 10476759 | 0.009531 | 7.50E-05 | up   | 1.567507 | 0.648472 | 1180.347 | 752.9248 | Rin2                                                                                                                                     | 74030 Ras and Rab interactor 2                                                                                      |
| 10406672 | 0.009699 | 7.71E-05 | up   | 1.667782 | 0.737931 | 471.5566 | 282.9103 | Arsb                                                                                                                                     | 11881 arylsulfatase B                                                                                               |
| 10458709 | 0.009699 | 7.68E-05 | down | -3.45627 | -1.78921 | 219.8928 | 751.1387 | Gm94                                                                                                                                     | 225443 predicted gene 94                                                                                            |
| 10478066 | 0.009699 | 7.74E-05 | up   | 1.661343 | 0.73235  | 110.935  | 66.72238 | Shng11                                                                                                                                   | 319317 small nucleolar RNA host gene 11 (non-protein coding)                                                        |
| 10523182 | 0.009929 | 7.96E-05 | down | -2.42704 | -1.2792  | 548.1796 | 1336.971 | Areg                                                                                                                                     | 11839 amphiregulin                                                                                                  |
| 10359861 | 0.010007 | 8.47E-05 | down | -1.60692 | -0.6843  | 203.1434 | 326.348  | Mgst3                                                                                                                                    | 66447 microsomal glutathione S-transferase 3                                                                        |
| 10377473 | 0.010007 | 8.14E-05 | up   | 1.973021 | 0.980406 | 535.3527 | 270.5134 | Aloxe3                                                                                                                                   | 23801 arachidonate lipoxygenase 3                                                                                   |
| 10395466 | 0.010007 | 8.51E-05 | up   | 1.654384 | 0.726294 | 937.3113 | 566.3429 | Dock4                                                                                                                                    | 238130 dedicator of cytokinesis 4                                                                                   |
| 10407387 | 0.010007 | 8.45E-05 | up   | 1.773209 | 0.826363 | 418.4966 | 236.0228 | Gm7120                                                                                                                                   | 633640 predicted gene 7120                                                                                          |
| 10409278 | 0.010007 | 8.41E-05 | down | -1.63383 | -0.70825 | 892.934  | 1459.923 | Nfil3                                                                                                                                    | 18030 nuclear factor, interleukin 3, regulated                                                                      |
| 10424370 | 0.010007 | 8.09E-05 | down | -1.74742 | -0.80523 | 392.8605 | 685.219  | Trib1                                                                                                                                    | 211770 tribbles homolog 1 (Drosophila)                                                                              |
| 10449644 | 0.010007 | 8.38E-05 | down | -1.7423  | -0.80099 | 976.2949 | 1700.468 | Glo1                                                                                                                                     | 109801 glyoxalase 1                                                                                                 |
| 10471675 | 0.010007 | 8.08E-05 | down | -1.7501  | -0.80744 | 1200.803 | 2101.24  | Glo1                                                                                                                                     | 109801 glyoxalase 1                                                                                                 |
| 10504838 | 0.010007 | 8.32E-05 | down | -2.82043 | -1.49592 | 409.2011 | 1138.705 | Nr4a3                                                                                                                                    | 18124 nuclear receptor subfamily 4, group A, member 3                                                               |
| 10545255 | 0.010007 | 8.48E-05 | down | -1.68824 | -0.75552 | 168.0154 | 283.2716 | Rpia                                                                                                                                     | 19895 ribose 5-phosphate isomerase A                                                                                |
| 10555389 | 0.010007 | 8.21E-05 | down | -1.84027 | -0.87992 | 2391.857 | 4388.869 | Ucp2                                                                                                                                     | 22228 uncoupling protein 2 (mitochondrial, proton carrier)                                                          |
| 10586614 | 0.010007 | 8.34E-05 | down | -1.72041 | -0.78276 | 240.7612 | 414.002  | Fam148b                                                                                                                                  | 75697 family with sequence similarity 148, member B                                                                 |
| 10596303 | 0.010007 | 8.43E-05 | down | -3.85245 | -1.94578 | 645.6599 | 2422.788 | Acpp                                                                                                                                     | 56318 acid phosphatase, prostate                                                                                    |
| 10598175 | 0.010007 | 8.21E-05 | down | -2.31728 | -1.21243 | 71.31818 | 166.4832 | Ear10   Ear2 93725   13 eosinophil-associated, ribonuclease A family, member 10   eosinophil-associated, ribonuclease A family, member 1 |                                                                                                                     |
| 10524089 | 0.010053 | 8.58E-05 | up   | 1.971357 | 0.979189 | 520.4571 | 263.9837 | Plcx1                                                                                                                                    | 403178 phosphatidylinositol-specific phospholipase C, X domain containing 1                                         |
| 10414433 | 0.010155 | 8.70E-05 | up   | 1.812578 | 0.858043 | 568.398  | 312.8879 | 6720456H2                                                                                                                                | 218989 RIKEN cDNA 6720456H20 gene                                                                                   |
| 10383194 | 0.010262 | 8.87E-05 | up   | 1.696075 | 0.7622   | 584.6686 | 345.1004 |                                                                                                                                          |                                                                                                                     |
| 10579987 | 0.010262 | 8.87E-05 | up   | 1.610012 | 0.687071 | 235.0775 | 145.9259 | Scoc                                                                                                                                     | 56367 short coiled-coil protein                                                                                     |
| 10499924 | 0.010278 | 8.95E-05 | up   | 2.154967 | 1.107666 | 4282.617 | 1995.974 | Lce1e                                                                                                                                    | 68694 late cornified envelope 1E                                                                                    |
| 10526087 | 0.010278 | 8.93E-05 | up   | 1.63102  | 0.705775 | 486.4675 | 298.1942 | Sumf2                                                                                                                                    | 67902 sulfatase modifying factor 2                                                                                  |
| 10552140 | 0.010327 | 9.03E-05 | down | -1.76256 | -0.81767 | 460.6234 | 811.4    | Cebp2                                                                                                                                    | 12606 CCAAT/enhancer binding protein (C/EBP), alpha                                                                 |

|          |          |          |      |          |          |          |          |                |                                                                                                 |
|----------|----------|----------|------|----------|----------|----------|----------|----------------|-------------------------------------------------------------------------------------------------|
| 10565775 | 0.010383 | 9.12E-05 | down | -1.7251  | -0.78668 | 950.1238 | 1636.638 | Dgat2          | 67800 diacylglycerol O-acyltransferase 2                                                        |
| 10359917 | 0.010751 | 9.54E-05 | up   | 1.751267 | 0.808399 | 1152.487 | 657.2196 | Hsd17b7        | 15490 hydroxysteroid (17-beta) dehydrogenase 7                                                  |
| 10377364 | 0.010751 | 9.48E-05 | up   | 1.577405 | 0.657553 | 600.905  | 381.0722 | Rnf222         | 320040 ring finger protein 222                                                                  |
| 10527638 | 0.010751 | 9.57E-05 | down | -1.90098 | -0.92674 | 120.3538 | 229.0753 | Alox5ap        | 11690 arachidonate 5-lipoxygenase activating protein                                            |
| 10569870 | 0.010751 | 9.59E-05 | down | -2.00214 | -1.00154 | 134.6318 | 269.7759 | Retn           | 57264 resistin                                                                                  |
| 10347888 | 0.010788 | 9.70E-05 | down | -1.86869 | -0.90203 | 147.9504 | 275.4756 | Ccl20          | 20297 chemokine (C-C motif) ligand 20                                                           |
| 10526514 | 0.010788 | 9.69E-05 | down | -1.7095  | -0.77358 | 217.3209 | 370.8098 | Cldn15         | 60363 claudin 15                                                                                |
| 10491300 | 0.010959 | 9.89E-05 | down | -1.53134 | -0.61479 | 565.6836 | 866.2016 | Skil           | 20482 SKI-like                                                                                  |
| 10521038 | 0.011013 | 9.98E-05 | down | -1.59317 | -0.6719  | 117.1989 | 186.5882 | Slc5a1         | 20537 solute carrier family 5 (sodium/glucose cotransporter), member 1                          |
| 10522467 | 0.011155 | 1.01E-04 | up   | 1.537733 | 0.620805 | 212.507  | 138.2205 | Rasl11b        | 68939 RAS-like, family 11, member B                                                             |
| 10383196 | 0.011444 | 1.05E-04 | up   | 1.716059 | 0.779099 | 317.3258 | 184.6677 |                |                                                                                                 |
| 10391378 | 0.011444 | 1.06E-04 | up   | 2.226624 | 1.154858 | 682.7758 | 307.4733 | Ezh1           | 14055 enhancer of zeste homolog 1 (Drosophila)                                                  |
| 10406017 | 0.011444 | 1.05E-04 | down | -1.64164 | -0.71514 | 102.3395 | 168.1862 | Irx4           | 50916 Iroquois related homeobox 4 (Drosophila)                                                  |
| 10453423 | 0.011444 | 1.05E-04 | down | -1.70679 | -0.77128 | 90.21242 | 153.8215 | Gm10309        | 1E+08 predicted gene 10309                                                                      |
| 10414514 | 0.011446 | 1.06E-04 | up   | 1.627024 | 0.702235 | 706.6363 | 434.2158 | Pnp1           | 18950 purine-nucleoside phosphorylase 1                                                         |
| 10377439 | 0.011452 | 1.07E-04 | down | -1.61764 | -0.69389 | 540.1254 | 874.1057 | Per1           | 18626 period homolog 1 (Drosophila)                                                             |
| 10566026 | 0.011452 | 1.07E-04 | down | -1.54869 | -0.63105 | 84.2837  | 130.566  | Folr2          | 14276 folate receptor 2 (fetal)                                                                 |
| 10601595 | 0.011452 | 1.07E-04 | up   | 1.560167 | 0.641701 | 66.16308 | 42.41514 | 3110007F173061 | 62 RIKEN cDNA 3110007F17 gene   predicted gene 6604   predicted gene 5167   predicted gene 2411 |
| 10358038 | 0.011502 | 1.09E-04 | up   | 1.689613 | 0.756692 | 421.5963 | 249.2067 | Rnpep          | 215615 arginyl aminopeptidase (aminopeptidase B)                                                |
| 10369647 | 0.011502 | 1.08E-04 | down | -1.58051 | -0.66039 | 304.1973 | 481.1144 | Ddx50          | 94213 DEAD (Asp-Glu-Ala-Asp) box polypeptide 50                                                 |
| 10452202 | 0.011743 | 1.11E-04 | down | -2.00287 | -1.00207 | 91.06202 | 182.6874 | Acer1          | 171168 alkaline ceramidase 1                                                                    |
| 10474467 | 0.0118   | 1.12E-04 | down | -1.60048 | -0.6785  | 101.3842 | 162.2083 | Muc15          | 269328 mucin 15                                                                                 |
| 10359266 | 0.011852 | 1.13E-04 | down | -2.28199 | -1.19029 | 110.8865 | 250.7852 | Pappa2         | 23850 pappalysin 2                                                                              |
| 10539238 | 0.011862 | 1.14E-04 | down | -1.54512 | -0.62772 | 335.9209 | 518.9041 | Fam176a        | 232146 family with sequence similarity 176, member A                                            |
| 10572449 | 0.011862 | 1.14E-04 | up   | 1.578412 | 0.658474 | 1315.888 | 833.0855 | Lsm4           | 50783 LSM4 homolog, U6 small nuclear RNA associated (S. cerevisiae)                             |
| 10517236 | 0.011934 | 1.15E-04 | up   | 1.777157 | 0.829572 | 430.0887 | 241.9457 | Zfp593         | 68040 zinc finger protein 593                                                                   |
| 10516266 | 0.012    | 1.16E-04 | down | -1.7041  | -0.76901 | 621.145  | 1058.655 | Zc3h12a        | 230738 zinc finger CCCH type containing 12A                                                     |
| 10575153 | 0.012    | 1.17E-04 | up   | 1.630202 | 0.705051 | 1086.551 | 665.9782 | Cyb5b          | 66427 cytochrome b5 type B                                                                      |
| 10488020 | 0.012006 | 1.17E-04 | down | -1.88024 | -0.91092 | 859.0883 | 1616.045 | Tmx4           | 52837 thioredoxin-related transmembrane protein 4                                               |
| 10572693 | 0.012006 | 1.17E-04 | down | -1.91975 | -0.94092 | 278.8494 | 533.0833 | Jak3 Insl3     | 16453   16 Janus kinase 3   insulin-like 3                                                      |
| 10537785 | 0.012084 | 1.19E-04 | down | -1.81126 | -0.85699 | 91.37072 | 165.4282 | Tas2r143       | 387514 taste receptor, type 2, member 143                                                       |
| 10429555 | 0.012107 | 1.19E-04 | up   | 1.685758 | 0.753398 | 118.2113 | 70.006   | 201010910I     | 67038 RIKEN cDNA 201010910I gene                                                                |
| 10402554 | 0.012164 | 1.21E-04 | down | -1.58215 | -0.66189 | 406.4121 | 642.6362 | Bcl11b         | 58208 B-cell leukemia/lymphoma 11B                                                              |
| 10575926 | 0.012164 | 1.21E-04 | down | -1.51669 | -0.60092 | 211.154  | 320.2686 | Atp2c2         | 69047 ATPase, Ca++ transporting, type 2C, member 2                                              |
| 10519717 | 0.012427 | 1.24E-04 | down | -1.8432  | -0.88221 | 227.0757 | 419.2572 | Sema3a         | 20346 sema domain, immunoglobulin domain (Ig), short basic domain, secreted, (semaphorin) 3A    |
| 10350349 | 0.01245  | 1.24E-04 | up   | 1.539546 | 0.622505 | 585.0264 | 380.0021 | Dennd1b        | 329260 DENN/MADD domain containing 1B                                                           |
| 10471474 | 0.012465 | 1.25E-04 | down | -1.50251 | -0.58737 | 1197.554 | 1799.457 | Ak1            | 11636 adenylate kinase 1                                                                        |
| 10376332 | 0.012747 | 1.29E-04 | up   | 1.738024 | 0.797448 | 193.6512 | 111.7292 | 4930438AC      | 73988 RIKEN cDNA 4930438A08 gene                                                                |
| 10569280 | 0.012747 | 1.29E-04 | down | -1.6033  | -0.68105 | 456.1654 | 730.7486 | Dusp8          | 18218 dual specificity phosphatase 8                                                            |
| 10571467 | 0.012747 | 1.29E-04 | down | -1.51208 | -0.59653 | 187.8673 | 284.0107 | Pdgfrl         | 68797 platelet-derived growth factor receptor-like                                              |
| 10361680 | 0.012884 | 1.32E-04 | down | -1.60066 | -0.67867 | 89.1483  | 142.5809 | BC013529       | 215751                                                                                          |
| 10445898 | 0.012884 | 1.32E-04 | up   | 1.517847 | 0.602026 | 1975.819 | 1301.582 | Rab5a          | 271457 RAB5A, member RAS oncogene family                                                        |
| 10450982 | 0.012884 | 1.32E-04 | down | -1.69427 | -0.76066 | 96.33004 | 162.9144 | Gpr115         | 78249 G protein-coupled receptor 115                                                            |
| 10507334 | 0.012884 | 1.32E-04 | up   | 1.502645 | 0.587504 | 164.7965 | 109.6577 | 0610037D1      | 68394 RIKEN cDNA 0610037D15 gene                                                                |
| 10523547 | 0.012901 | 1.33E-04 | up   | 1.7678   | 0.821955 | 494.8199 | 280.193  | Agpat9         | 231510 1-acylglycerol-3-phosphate O-acyltransferase 9                                           |
| 10451953 | 0.012902 | 1.33E-04 | down | -5.28283 | -2.40131 | 147.3162 | 742.4647 | Lrg1           | 76905 leucine-rich alpha-2-glycoprotein 1                                                       |
| 10467124 | 0.012973 | 1.35E-04 | up   | 1.563751 | 0.645011 | 4193.857 | 2683.751 | Acta2          | 11475 actin, alpha 2, smooth muscle, aorta                                                      |
| 10458555 | 0.013103 | 1.37E-04 | down | -1.70884 | -0.77301 | 514.9    | 882.1055 | Spry4          | 24066 sprouty homolog 4 (Drosophila)                                                            |
| 10465895 | 0.013103 | 1.38E-04 | up   | 1.708007 | 0.772314 | 944.2929 | 551.4612 | Fads2          | 56473 fatty acid desaturase 2                                                                   |
| 10545192 | 0.013103 | 1.37E-04 | up   | 1.552709 | 0.634787 | 239.2007 | 154.1569 | Rprl1          | 19783 ribonuclease P RNA-like 1                                                                 |
| 10550059 | 0.013103 | 1.37E-04 | up   | 2.874112 | 1.523116 | 507.6807 | 178.3271 | 2310014L1      | 381845 RIKEN cDNA 2310014L17 gene                                                               |
| 10383233 | 0.013335 | 1.42E-04 | up   | 1.558457 | 0.640119 | 670.1839 | 430.1065 | Rnf213         | 672511 ring finger protein 213                                                                  |
| 10444680 | 0.013335 | 1.42E-04 | down | -1.97506 | -0.9819  | 214.9153 | 424.2103 | Ly6g6e         | 70274 lymphocyte antigen 6 complex, locus G6E                                                   |
| 10451893 | 0.013335 | 1.42E-04 | down | -1.49769 | -0.58274 | 310.6571 | 465.1937 | Stap2          | 106766 signal transducing adaptor family member 2                                               |
| 10473281 | 0.013335 | 1.43E-04 | up   | 1.496452 | 0.581546 | 2876.643 | 1922.5   | Itgav          | 16410 integrin alpha V                                                                          |
| 10528527 | 0.013335 | 1.43E-04 | up   | 1.490559 | 0.575853 | 470.1662 | 315.4257 | Fam126a        | 84652 family with sequence similarity 126, member A                                             |
| 10545409 | 0.013335 | 1.43E-04 | down | -1.52234 | -0.60629 | 954.2103 | 1451.982 | Vamp8          | 22320 vesicle-associated membrane protein 8                                                     |
| 10347767 | 0.013537 | 1.47E-04 | down | -2.14595 | -1.10162 | 377.5737 | 813.5566 | Kcne4          | 57814 potassium voltage-gated channel, Isk-related subfamily, gene 4                            |
| 10466604 | 0.013537 | 1.47E-04 | down | -2.1371  | -1.09565 | 189.0027 | 407.3364 |                |                                                                                                 |
| 10546929 | 0.013537 | 1.48E-04 | down | -1.53669 | -0.61983 | 116.418  | 178.9909 | Cidec          | 14311 cell death-inducing DFFA-like effector c                                                  |
| 10571752 | 0.013537 | 1.46E-04 | up   | 1.689887 | 0.756927 | 837.19   | 494.5069 | Dctd           | 320685 dCMP deaminase                                                                           |
| 10587534 | 0.013537 | 1.47E-04 | down | -1.85323 | -0.89004 | 237.9324 | 441.8754 | Bckdhh         | 12040 branched chain ketoacid dehydrogenase E1, beta polypeptide                                |
| 10355974 | 0.013562 | 1.48E-04 | down | -1.4875  | -0.57289 | 196.2692 | 291.9444 | Wdfy1          | 69368 WD repeat and FYVE domain containing 1                                                    |
| 10500140 | 0.013682 | 1.50E-04 | up   | 1.696843 | 0.762853 | 1067.027 | 629.8081 | Anxa9          | 17190 annexin A9                                                                                |
| 10383214 | 0.013926 | 1.54E-04 | up   | 1.476412 | 0.562096 | 1005.538 | 681.0508 | Rnf213         | 672511 ring finger protein 213                                                                  |

|          |          |          |      |          |          |          |          |                   |                                                                                   |                                                                                   |
|----------|----------|----------|------|----------|----------|----------|----------|-------------------|-----------------------------------------------------------------------------------|-----------------------------------------------------------------------------------|
| 10460257 | 0.013926 | 1.53E-04 | down | -1.52637 | -0.61011 | 137.6298 | 210.0112 | 1700055NC         | 73458                                                                             | RIKEN cDNA 1700055N04 gene                                                        |
| 10359280 | 0.013927 | 1.55E-04 | down | -2.17007 | -1.11774 | 105.4346 | 227.6805 | Pappa2            | 23850                                                                             | pappalysin 2                                                                      |
| 10595836 | 0.013927 | 1.55E-04 | up   | 1.678515 | 0.747185 | 156.5514 | 93.37273 | E0300110C         | 319859                                                                            | RIKEN cDNA E030011O05 gene                                                        |
| 10599463 | 0.013927 | 1.54E-04 | down | -1.87169 | -0.90835 | 189.0169 | 353.6507 | Xpnp2             | 170745                                                                            | X-prolyl aminopeptidase (aminopeptidase P) 2, membrane-bound                      |
| 10505623 | 0.014362 | 1.60E-04 | down | -1.57571 | -0.656   | 546.2227 | 860.6103 | D4Bwg095          | 52829                                                                             | DNA segment, Chr 4, Brigham & Women's Genetics 0951 expressed                     |
| 10426889 | 0.014388 | 1.61E-04 | down | -1.51022 | -0.59475 | 209.4771 | 316.2163 | Sec61b            | 66212                                                                             | Sec61 beta subunit                                                                |
| 10431229 | 0.014388 | 1.62E-04 | down | -1.48582 | -0.57126 | 145.7628 | 216.5424 | Celsr1            | 12614                                                                             | cadherin, EGF LAG seven-pass G-type receptor 1 (flamingo homolog, Drosophila)     |
| 10398211 | 0.014567 | 1.64E-04 | down | -1.72758 | -0.78875 | 235.0722 | 405.6378 | Hhpl1             | 214305                                                                            | hedgehog interacting protein-like 1                                               |
| 10518484 | 0.014567 | 1.65E-04 | up   | 1.716186 | 0.779206 | 157.4894 | 92.0389  | Fbxo44            | 230903                                                                            | F-box protein 44                                                                  |
| 10363070 | 0.014606 | 1.66E-04 | down | -1.60877 | -0.68589 | 296.0003 | 476.9646 | Gp49a Lilr14727   | 14                                                                                | glycoprotein 49 A   leukocyte immunoglobulin-like receptor, subfamily B, member 4 |
| 10486029 | 0.014606 | 1.66E-04 | down | -1.47777 | -0.56342 | 529.9588 | 783.2448 | Atpbd4            | 66632                                                                             | ATP binding domain 4                                                              |
| 10583809 | 0.014895 | 1.70E-04 | up   | 1.524694 | 0.608519 | 137.0591 | 89.9265  | Cnn1              | 12797                                                                             | calponin 1                                                                        |
| 10472794 | 0.014963 | 1.72E-04 | up   | 1.540364 | 0.623272 | 208.2023 | 135.1802 | Metap1            | 66559                                                                             | methionine aminopeptidase-like 1                                                  |
| 10559818 | 0.014963 | 1.72E-04 | down | -2.18289 | -1.12624 | 46.97442 | 103.4412 |                   |                                                                                   |                                                                                   |
| 10347734 | 0.014973 | 1.74E-04 | down | -1.66531 | -0.73579 | 82.02299 | 136.7668 | Sgpp2             | 433323                                                                            | sphingosine-1-phosphate phosphatase 2                                             |
| 10389561 | 0.014973 | 1.73E-04 | up   | 1.55572  | 0.637582 | 418.6221 | 269.3361 | Dhx40             | 67487                                                                             | DEAH (Asp-Glu-Ala-His) box polypeptide 40                                         |
| 10447004 | 0.014973 | 1.74E-04 | up   | 1.528379 | 0.612002 | 1274.026 | 834.2123 | Hdac1             | 433759                                                                            | histone deacetylase 1                                                             |
| 10457644 | 0.014973 | 1.75E-04 | up   | 1.691045 | 0.757915 | 621.4303 | 367.4944 | Cdh2              | 12558                                                                             | cadherin 2                                                                        |
| 10565456 | 0.014973 | 1.75E-04 | down | -1.65954 | -0.73078 | 274.9119 | 455.4697 | Prss23            | 76453                                                                             | protease, serine, 23                                                              |
| 10344966 | 0.01501  | 1.76E-04 | up   | 1.473772 | 0.559513 | 1219.937 | 827.8963 | Ly96              | 17087                                                                             | lymphocyte antigen 96                                                             |
| 10356764 | 0.015028 | 1.76E-04 | down | -2.63737 | -1.3991  | 215.8187 | 561.5343 | 2310007BC         | 71874                                                                             | RIKEN cDNA 2310007B03 gene                                                        |
| 10383152 | 0.015226 | 1.79E-04 | up   | 1.458113 | 0.544102 | 665.4845 | 456.4053 |                   |                                                                                   |                                                                                   |
| 10417544 | 0.015252 | 1.80E-04 | up   | 1.850418 | 0.887851 | 167.8805 | 90.26694 | Acox2             | 93732                                                                             | acyl-Coenzyme A oxidase 2, branched chain                                         |
| 10389990 | 0.015279 | 1.81E-04 | up   | 1.692754 | 0.759372 | 1074.161 | 634.8758 | Epn3              | 71889                                                                             | epsin 3                                                                           |
| 10440186 | 0.015279 | 1.81E-04 | up   | 1.921393 | 0.942153 | 791.1213 | 412.3763 | Crybg3            | 224273                                                                            | beta-gamma crystallin domain containing 3                                         |
| 10434815 | 0.015463 | 1.84E-04 | down | -1.47191 | -0.55769 | 1234.29  | 1816.413 | Trp63             | 22061                                                                             | transformation related protein 63                                                 |
| 10357604 | 0.015585 | 1.87E-04 | up   | 1.601984 | 0.67986  | 298.6919 | 186.6909 | Ikbke             | 56489                                                                             | inhibitor of kappaB kinase epsilon                                                |
| 10499914 | 0.015585 | 1.87E-04 | up   | 1.629334 | 0.704283 | 2521.401 | 1550.282 | Lce1b             | 68720                                                                             | late cornified envelope 1B                                                        |
| 10499930 | 0.01583  | 1.90E-04 | up   | 2.197163 | 1.135642 | 356.3027 | 163.7589 | Lce1g             | 66195                                                                             | late cornified envelope 1G                                                        |
| 10565315 | 0.015957 | 1.92E-04 | down | -1.95484 | -0.96705 | 1004.697 | 1955.391 | Fah               | 14085                                                                             | fumarylacetoacetate hydrolase                                                     |
| 10359870 | 0.016074 | 1.95E-04 | up   | 1.488532 | 0.57389  | 1276.739 | 857.622  | Pbx1              | 18514                                                                             | pre B-cell leukemia transcription factor 1                                        |
| 10513869 | 0.016074 | 1.96E-04 | down | -1.49191 | -0.57717 | 563.3354 | 840.041  | Megf9             | 230316                                                                            | multiple EGF-like-domains 9                                                       |
| 10519983 | 0.016074 | 1.96E-04 | down | -3.05624 | -1.61176 | 134.9919 | 405.3379 | Fgl2              | 14190                                                                             | fibrinogen-like protein 2                                                         |
| 10573198 | 0.016074 | 1.96E-04 | down | -1.74534 | -0.80351 | 600.3987 | 1049.676 | Dnajb1            | 81489                                                                             | Dnaj (Hsp40) homolog, subfamily B, member 1                                       |
| 10584470 | 0.016074 | 1.95E-04 | down | -1.71194 | -0.77563 | 52.60265 | 90.312   | Olf2r Olf2r18324  | 25                                                                                | olfactory receptor 26   olfactory receptor 933                                    |
| 10554969 | 0.016129 | 1.98E-04 | down | -2.05442 | -1.03873 | 196.0986 | 399.4865 | Odz4              | 23966                                                                             | odd Oz/ten-m homolog 4 (Drosophila)                                               |
| 10414527 | 0.016195 | 1.99E-04 | up   | 1.754858 | 0.811355 | 1453.293 | 828.9237 | Pnp2 Pnp1667034   | 1                                                                                 | purine-nucleoside phosphorylase 2   purine-nucleoside phosphorylase 1             |
| 10357249 | 0.016121 | 2.00E-04 | down | -1.65437 | -0.72628 | 352.2799 | 581.4354 | Steap3 Ste68428   | 70                                                                                | STEAP family member 3   six transmembrane epithelial antigen of the prostate 1    |
| 10518372 | 0.016121 | 2.01E-04 | up   | 1.490321 | 0.575623 | 308.1374 | 206.8057 | Miip              | 28010                                                                             | migration and invasion inhibitory protein                                         |
| 10543253 | 0.016121 | 2.00E-04 | down | -1.6107  | -0.68769 | 88.58877 | 142.7165 | Wnt2              | 22413                                                                             | wingless-related MMTV integration site 2                                          |
| 10349295 | 0.016221 | 2.02E-04 | up   | 1.81167  | 0.85732  | 212.49   | 116.974  | Tcfcp2l1          | 81879                                                                             | transcription factor CP2-like 1                                                   |
| 10530100 | 0.016409 | 2.04E-04 | down | -1.80584 | -0.85267 | 435.3658 | 784.9616 | Arap2             | 212285                                                                            | ArfGAP with RhoGAP domain, ankyrin repeat and PH domain 2                         |
| 10516605 | 0.016532 | 2.07E-04 | up   | 1.530339 | 0.613852 | 1432.518 | 937.0135 | Hdac1             | 433759                                                                            | histone deacetylase 1                                                             |
| 10393177 | 0.016542 | 2.08E-04 | down | -1.49777 | -0.58282 | 625.2366 | 936.8436 | Acox1             | 11430                                                                             | acyl-Coenzyme A oxidase 1, palmitoyl                                              |
| 10398442 | 0.016542 | 2.08E-04 | up   | 1.658309 | 0.729713 | 98.35772 | 59.19991 |                   |                                                                                   |                                                                                   |
| 10357870 | 0.016672 | 2.10E-04 | down | -1.85598 | -0.89218 | 966.5512 | 1784.332 | Prelp             | 116847                                                                            | proline arginine-rich end leucine-rich repeat                                     |
| 10354588 | 0.016786 | 2.14E-04 | down | -1.64629 | -0.71921 | 640.9052 | 1054.058 | Stk17b            | 98267                                                                             | serine/threonine kinase 17b (apoptosis-inducing)                                  |
| 10417167 | 0.016786 | 2.14E-04 | up   | 2.380081 | 1.251011 | 1096.907 | 457.326  | Clybl             | 69634                                                                             | citrate lyase beta like                                                           |
| 10465059 | 0.016786 | 2.14E-04 | up   | 1.441646 | 0.527717 | 164.4551 | 114.0727 | Ctsw              | 13041                                                                             | cathepsin W                                                                       |
| 10523717 | 0.016786 | 2.15E-04 | up   | 1.495791 | 0.580909 | 6572.355 | 4392.64  | Spp1              | 20750                                                                             | secreted phosphoprotein 1                                                         |
| 10545528 | 0.016786 | 2.13E-04 | up   | 1.513344 | 0.59774  | 187.397  | 123.7568 | Pigp              | 56176                                                                             | phosphatidylinositol glycan anchor biosynthesis, class P                          |
| 10560618 | 0.016786 | 2.15E-04 | down | -2.58339 | -1.36927 | 104.7558 | 266.6248 | Apoc1 Gcc11812    | 74                                                                                | apolipoprotein C-I   golgi coiled coil 1                                          |
| 10357875 | 0.016789 | 2.16E-04 | down | -2.63058 | -1.39538 | 1084.855 | 2854.571 | Btg2              | 12227                                                                             | B-cell translocation gene 2, anti-proliferative                                   |
| 10496569 | 0.016789 | 2.16E-04 | up   | 1.541169 | 0.624025 | 163.369  | 105.917  | Gbp6              | 229900                                                                            | guanylate binding protein 6                                                       |
| 10457606 | 0.016954 | 2.19E-04 | down | -1.4403  | -0.52636 | 177.0004 | 254.9274 | Kctd1             | 106931                                                                            | potassium channel tetramerisation domain containing 1                             |
| 10358408 | 0.017011 | 2.20E-04 | down | -1.99038 | -0.99304 | 146.2576 | 293.3946 | Rgs1              | 50778                                                                             | regulator of G-protein signaling 1                                                |
| 10417526 | 0.017205 | 2.24E-04 | down | -1.79158 | -0.84124 | 688.6957 | 1230.729 | Dnase1B           | 13421                                                                             | deoxyribonuclease 1-like 3                                                        |
| 10444291 | 0.017205 | 2.24E-04 | up   | 3.44653  | 1.785145 | 466.0234 | 134.4784 | H2-Ab1            | 14961                                                                             | histocompatibility 2, class II antigen A, beta 1                                  |
| 10499945 | 0.017205 | 2.26E-04 | up   | 1.501936 | 0.586823 | 147.4804 | 98.16853 | Lce1l             | 73730                                                                             | late cornified envelope 1L                                                        |
| 10501222 | 0.017205 | 2.26E-04 | down | -1.68188 | -0.75008 | 1364.737 | 2288.177 | Gstm2             | 14863                                                                             | glutathione S-transferase, mu 2                                                   |
| 10516487 | 0.017205 | 2.25E-04 | up   | 2.459981 | 1.298647 | 1511.535 | 615.8788 | Gjb4              | 14621                                                                             | gap junction protein, beta 4                                                      |
| 10383204 | 0.017353 | 2.29E-04 | up   | 1.467862 | 0.553716 | 495.368  | 337.4495 |                   |                                                                                   |                                                                                   |
| 10407211 | 0.017353 | 2.29E-04 | up   | 1.570805 | 0.651504 | 1192.323 | 760.2876 | Ppap2a            | 19012                                                                             | phosphatidic acid phosphatase type 2A                                             |
| 10508770 | 0.017729 | 2.35E-04 | up   | 1.550962 | 0.633163 | 143.0166 | 92.12809 | Gm13033 100038703 | predicted gene 13033   similar to prostaglandin-endoperoxide synthase 2 precursor |                                                                                   |
| 10605303 | 0.017729 | 2.35E-04 | down | -1.48827 | -0.57363 | 145.9721 | 217.1808 | Dnase11           | 69537                                                                             | deoxyribonuclease 1-like 1                                                        |

|          |          |          |      |          |          |          |          |                  |            |                                                                                                                  |
|----------|----------|----------|------|----------|----------|----------|----------|------------------|------------|------------------------------------------------------------------------------------------------------------------|
| 10359282 | 0.017743 | 2.38E-04 | down | -2.01324 | -1.00952 | 125.4815 | 254.7691 | Pappa2           | 23850      | pappalysin 2                                                                                                     |
| 10421524 | 0.017743 | 2.38E-04 | down | -3.84962 | -1.94471 | 66.32155 | 259.6028 |                  |            |                                                                                                                  |
| 10582845 | 0.017743 | 2.37E-04 | down | -3.8643  | -1.95021 | 66.40021 | 260.9219 |                  |            |                                                                                                                  |
| 10596051 | 0.017743 | 2.38E-04 | up   | 1.915376 | 0.937628 | 138.6369 | 72.38685 | Tmem22           | 245020     | transmembrane protein 22                                                                                         |
| 10451932 | 0.017764 | 2.39E-04 | down | -2.7562  | -1.46268 | 177.0823 | 478.7733 | Plin4            | 57435      | perilipin 4                                                                                                      |
| 10434808 | 0.017804 | 2.41E-04 | down | -4.11024 | -2.03922 | 241.6929 | 950.9918 | Tprg             | 71338      | transformation related protein 63 regulated                                                                      |
| 10512156 | 0.017804 | 2.41E-04 | down | -2.40181 | -1.26412 | 199.3277 | 483.1962 | Aqp3             | 11828      | aquaporin 3                                                                                                      |
| 10526363 | 0.017804 | 2.40E-04 | down | -1.73415 | -0.79422 | 854.5414 | 1488.047 | Por              | 18984      | P450 (cytochrome) oxidoreductase                                                                                 |
| 10371271 | 0.017825 | 2.42E-04 | up   | 1.471052 | 0.556848 | 296.9446 | 201.7706 | Zfp781           | 331188     | zinc finger protein 781                                                                                          |
| 10417599 | 0.017825 | 2.42E-04 | down | -3.85979 | -1.94852 | 66.48767 | 261.1892 |                  |            |                                                                                                                  |
| 10468898 | 0.017854 | 2.44E-04 | down | -1.59566 | -0.67415 | 122.8543 | 195.6771 | Lax1             | 240754     | lymphocyte transmembrane adaptor 1                                                                               |
| 10524234 | 0.017916 | 2.46E-04 | down | -1.70281 | -0.76792 | 93.23225 | 159.0175 | Galnt9           | 231605     | UDP-N-acetyl-alpha-D-galactosamine:polypeptide N-acetylgalactosaminyltransferase 9                               |
| 10586079 | 0.017916 | 2.45E-04 | up   | 2.38994  | 1.256974 | 414.8115 | 171.5953 | Itga11           | 319480     | integrin alpha 11                                                                                                |
| 10357833 | 0.017922 | 2.49E-04 | down | -1.63988 | -0.71359 | 872.3765 | 1427.164 | Atp2b4           | 381290     | ATPase, Ca++ transporting, plasma membrane 4                                                                     |
| 10393379 | 0.017922 | 2.49E-04 | up   | 1.538068 | 0.621119 | 513.698  | 334.2956 | Mxra7            | 67622      | matrix-remodelling associated 7                                                                                  |
| 10439766 | 0.017922 | 2.48E-04 | down | -1.66809 | -0.7382  | 321.8963 | 537.1664 | Pvrl3            | 58998      | poliovirus receptor-related 3                                                                                    |
| 10508368 | 0.017922 | 2.49E-04 | down | -1.65372 | -0.72572 | 145.3491 | 240.1156 | A3galt2          | 215493     | alpha 1,3-galactosyltransferase 2 (isoglobotriaosylceramide synthase)                                            |
| 10562223 | 0.017922 | 2.50E-04 | down | -2.47711 | -1.30866 | 1163.477 | 2834.29  | Fxyd3 Lg14       | 17178   24 | FXD domain-containing ion transport regulator 3   leucine-rich repeat LGI family, member 4                       |
| 10579823 | 0.017922 | 2.47E-04 | down | -3.85408 | -1.94639 | 66.37213 | 260.289  |                  |            |                                                                                                                  |
| 10593413 | 0.017922 | 2.49E-04 | down | -1.42571 | -0.51168 | 379.8103 | 541.5022 | 2310030G0        | 66952      | RIKEN cDNA 2310030G06 gene                                                                                       |
| 10436826 | 0.017924 | 2.51E-04 | down | -3.84535 | -1.94311 | 66.51553 | 260.3262 |                  |            |                                                                                                                  |
| 10538459 | 0.017972 | 2.52E-04 | up   | 1.941753 | 0.95736  | 413.8877 | 214.7412 | Aqp1             | 11826      | aquaporin 1                                                                                                      |
| 10596492 | 0.018019 | 2.53E-04 | up   | 1.489764 | 0.575084 | 554.2906 | 372.1091 | Parp3            | 235587     | poly (ADP-ribose) polymerase family, member 3                                                                    |
| 10566574 | 0.018118 | 2.55E-04 | up   | 1.525513 | 0.609295 | 141.0535 | 92.38255 | Gvin1            | 74558      | GTPase, very large interferon inducible 1                                                                        |
| 10399691 | 0.018142 | 2.58E-04 | down | -1.89984 | -0.92588 | 2069.52  | 3904.389 | Id2              | 15902      | inhibitor of DNA binding 2                                                                                       |
| 10456296 | 0.018142 | 2.58E-04 | down | -1.45351 | -0.53954 | 239.3909 | 348.0863 | Malt1            | 240354     | mucosa associated lymphoid tissue lymphoma translocation gene 1                                                  |
| 10476658 | 0.018142 | 2.56E-04 | down | -3.8371  | -1.94002 | 66.42921 | 259.4417 |                  |            |                                                                                                                  |
| 10487405 | 0.018142 | 2.57E-04 | down | -1.79675 | -0.84539 | 306.4049 | 549.6527 | Prom2            | 192212     | prominin 2                                                                                                       |
| 10603485 | 0.018211 | 2.60E-04 | down | -1.57917 | -0.65917 | 573.4003 | 906.6511 | Ebp              | 13595      | phenylalkylamine Ca2+ antagonist (emopamil) binding protein                                                      |
| 10348917 | 0.018365 | 2.63E-04 | down | -1.4676  | -0.55346 | 141.4209 | 207.6182 | Fam174a          | 67698      | family with sequence similarity 174, member A                                                                    |
| 10462005 | 0.01844  | 2.64E-04 | up   | 1.435352 | 0.521405 | 539.9551 | 376.1284 | Tmem2            | 83921      | transmembrane protein 2                                                                                          |
| 10426208 | 0.01845  | 2.66E-04 | up   | 1.446051 | 0.532118 | 622.2524 | 430.4274 | Adm2             | 223780     | adrenomedullin 2                                                                                                 |
| 10584479 | 0.01845  | 2.65E-04 | down | -1.81295 | -0.85834 | 52.26371 | 95.00986 | Olfir933         | 258433     | olfactory receptor 933                                                                                           |
| 10601598 | 0.01845  | 2.66E-04 | up   | 1.51207  | 0.596525 | 64.41377 | 62.64936 | 3110007F1        | 73061   62 | RIKEN cDNA 3110007F17 gene   predicted gene 6604   predicted gene 5167   predicted gene 2411                     |
| 10376326 | 0.018492 | 2.71E-04 | up   | 1.421216 | 0.507125 | 122.9995 | 86.54371 | Irgm2 Igtp       | 54396   16 | immunity-related GTPase family M member 2   interferon gamma induced GTPase                                      |
| 10404407 | 0.018492 | 2.68E-04 | down | -1.65641 | -0.72806 | 223.938  | 371.8096 | Foxc1            | 17300      | forkhead box C1                                                                                                  |
| 10407350 | 0.018492 | 2.69E-04 | down | -1.95204 | -0.96498 | 339.6681 | 658.2447 | Fgf10            | 14165      | fibroblast growth factor 10                                                                                      |
| 10448117 | 0.018492 | 2.71E-04 | down | -1.52335 | -0.60725 | 158.2534 | 241.2607 | Has1             | 15116      | hyaluronan synthase1                                                                                             |
| 10530666 | 0.018492 | 2.71E-04 | up   | 1.652407 | 0.724569 | 193.8656 | 117.4928 | Lnx1             | 16924      | ligand of numb-protein X 1                                                                                       |
| 10593123 | 0.018492 | 2.69E-04 | up   | 1.930008 | 0.948607 | 640.2074 | 329.4457 | Tagln            | 21345      | transgelin                                                                                                       |
| 10361882 | 0.018514 | 2.75E-04 | down | -1.44919 | -0.53525 | 312.0794 | 452.1549 | Nhs1             | 215819     | NHS-like 1                                                                                                       |
| 10421810 | 0.018514 | 2.75E-04 | down | -1.55609 | -0.63792 | 217.3984 | 338.6881 | 1190002H2        | 66214      | RIKEN cDNA 1190002H23 gene                                                                                       |
| 10463189 | 0.018514 | 2.72E-04 | down | -2.1085  | -1.07622 | 185.1865 | 391.6033 | Ankrd2           | 56642      | ankyrin repeat domain 2 (stretch responsive muscle)                                                              |
| 10467319 | 0.018514 | 2.73E-04 | down | -1.97029 | -0.97841 | 850.7672 | 1666.445 | Rbp4             | 19662      | retinol binding protein 4, plasma                                                                                |
| 10499483 | 0.018514 | 2.74E-04 | up   | 1.480328 | 0.565917 | 1253.837 | 847.6866 | Fdps             | 110196     | farnesyl diphosphate synthetase                                                                                  |
| 10520288 | 0.018514 | 2.73E-04 | down | -1.51559 | -0.59988 | 255.2133 | 386.433  | Galnt11 E1231050 | 7          | UDP-N-acetyl-alpha-D-galactosamine:polypeptide N-acetylgalactosaminyltransferase 11   RIKEN cDNA E130116L18 gene |
| 10369792 | 0.01896  | 2.82E-04 | up   | 1.44029  | 0.52636  | 3769.655 | 2618.116 | Arid5b           | 71371      | AT rich interactive domain 5B (MRF1-like)                                                                        |
| 10398907 | 0.018961 | 2.83E-04 | down | -1.51012 | -0.59466 | 61.94978 | 93.649   | Pld4             | 104759     | phospholipase D family, member 4                                                                                 |
| 10398751 | 0.019139 | 2.89E-04 | up   | 1.523435 | 0.607328 | 321.4971 | 211.245  | Zfyve21          | 68520      | zinc finger, FYVE domain containing 21                                                                           |
| 10510574 | 0.019139 | 2.90E-04 | down | -1.47058 | -0.55639 | 4015.891 | 5901.358 | Errf1            | 74155      | ERBB receptor feedback inhibitor 1                                                                               |
| 10523563 | 0.019139 | 2.88E-04 | down | -1.69119 | -0.75804 | 179.596  | 304.7702 | Cds1             | 74596      | CDP-diacylglycerol synthase 1                                                                                    |
| 10524034 | 0.019139 | 2.88E-04 | up   | 1.491821 | 0.577074 | 592.4363 | 397.5275 | Idua             | 15932      | iduronidase, alpha-L-                                                                                            |
| 10577641 | 0.019139 | 2.89E-04 | down | -1.72236 | -0.78439 | 711.4964 | 1227.53  | 1810011O1        | 69068      | RIKEN cDNA 1810011O10 gene                                                                                       |
| 10587503 | 0.019139 | 2.90E-04 | down | -1.4835  | -0.569   | 677.4791 | 1004.188 | Sh3bgrl2         | 212531     | SH3 domain binding glutamic acid-rich protein like 2                                                             |
| 10598771 | 0.019139 | 2.87E-04 | down | -1.4546  | -0.54062 | 385.9025 | 561.0516 | Maoa             | 17161      | monoamine oxidase A                                                                                              |
| 10383200 | 0.01916  | 2.93E-04 | up   | 1.56704  | 0.648042 | 361.5819 | 231.0635 |                  |            |                                                                                                                  |
| 10445781 | 0.01916  | 2.93E-04 | down | -1.63439 | -0.70875 | 180.8796 | 296.5513 | Trem2            | 83433      | triggering receptor expressed on myeloid cells 2                                                                 |
| 10467470 | 0.01916  | 2.93E-04 | up   | 1.412710 | 0.498466 | 1549.386 | 1096.777 | Aldh18a1         | 56454      | aldehyde dehydrogenase 18 family, member A1                                                                      |
| 10541246 | 0.01916  | 2.93E-04 | down | -1.75288 | -0.80973 | 572.7018 | 999.4524 | Il17ra           | 16172      | interleukin 17 receptor A                                                                                        |
| 10524621 | 0.019247 | 2.95E-04 | up   | 1.838483 | 0.878515 | 454.3729 | 245.7247 | Oasl2            | 23962      | 2'-5' oligoadenylate synthetase-like 2                                                                           |
| 10437210 | 0.019406 | 2.99E-04 | down | -1.44489 | -0.53096 | 151.1112 | 218.2403 | Bace2            | 56175      | beta-site APP-cleaving enzyme 2                                                                                  |
| 10555041 | 0.019406 | 3.00E-04 | up   | 1.679632 | 0.748145 | 745.566  | 442.3841 | Alg8             | 381903     | asparagine-linked glycosylation 8 homolog (yeast, alpha-1,3-glucosyltransferase)                                 |
| 10595070 | 0.019406 | 2.99E-04 | down | -1.61918 | -0.69526 | 842.5956 | 1363.437 | Fam83b           | 208994     | family with sequence similarity 83, member B                                                                     |
| 10437399 | 0.019451 | 3.01E-04 | down | -1.52379 | -0.60766 | 337.2942 | 513.3521 | Coro7            | 78885      | coronin 7                                                                                                        |
| 10346348 | 0.019476 | 3.03E-04 | up   | 1.516544 | 0.600787 | 546.9212 | 361.0485 | Spats2l          | 67198      | spermatogenesis associated, serine-rich 2-like                                                                   |

|          |          |          |      |          |          |          |          |                 |                                                                                                                             |
|----------|----------|----------|------|----------|----------|----------|----------|-----------------|-----------------------------------------------------------------------------------------------------------------------------|
| 10360028 | 0.019476 | 3.04E-04 | down | -2.01708 | -1.01227 | 668.0267 | 1334.635 | Fcgr2b          | 14130 Fc receptor, IgG, low affinity IIb                                                                                    |
| 10467739 | 0.019476 | 3.04E-04 | down | -1.56569 | -0.6468  | 738.897  | 1158.249 | Avp1            | 69534 arginine vasopressin-induced 1                                                                                        |
| 10476401 | 0.019476 | 3.04E-04 | down | -2.12634 | -1.08837 | 143.7568 | 303.226  | P1cb1           | 18795 phospholipase C, beta 1                                                                                               |
| 10431697 | 0.019485 | 3.05E-04 | down | -2.13673 | -1.0954  | 170.9184 | 805.1678 | Abcd2           | 26874 ATP-binding cassette, sub-family D (ALD), member 2                                                                    |
| 10383202 | 0.019497 | 3.07E-04 | up   | 1.470609 | 0.556414 | 1187.607 | 806.92   |                 |                                                                                                                             |
| 10470248 | 0.019497 | 3.07E-04 | up   | 1.757247 | 0.813317 | 576.9848 | 329.1146 | Gpsm1           | 67839 G-protein signalling modulator 1 (AGS3-like, C. elegans)                                                              |
| 10558295 | 0.019497 | 3.07E-04 | up   | 1.52243  | 0.606376 | 1178.658 | 774.0477 | Zranb1          | 360216 zinc finger, RAN-binding domain containing 1                                                                         |
| 10457357 | 0.019539 | 3.09E-04 | down | -1.88863 | -0.91734 | 149.1363 | 283.1039 | Mpp7            | 75739 membrane protein, palmitoylated 7 (MAGUK p55 subfamily member 7)                                                      |
| 10500091 | 0.019546 | 3.09E-04 | up   | 1.472728 | 0.558491 | 1401.724 | 952.6015 | Scnm1           | 69269 sodium channel modifier 1                                                                                             |
| 10456005 | 0.019865 | 3.15E-04 | up   | 1.92599  | 0.9456   | 188.1116 | 98.03402 | Cd74            | 16149 CD74 antigen (invariant polypeptide of major histocompatibility complex, class II antigen-associated)                 |
| 10513608 | 0.019917 | 3.18E-04 | down | -1.80056 | -0.84845 | 758.972  | 1358.297 | Alad            | 17025 aminolevulinate, delta-, dehydratase                                                                                  |
| 10519497 | 0.019917 | 3.18E-04 | down | -2.35009 | -1.23272 | 348.6485 | 806.4404 | Steap4          | 117167 STEAP family member 4                                                                                                |
| 10540897 | 0.019917 | 3.19E-04 | down | -1.97117 | -0.97905 | 390.8196 | 763.4261 | Pparg           | 19016 peroxisome proliferator activated receptor gamma                                                                      |
| 10556413 | 0.019917 | 3.18E-04 | down | -1.53051 | -0.61401 | 160.3606 | 245.0228 | Micalcl         | 70877 MICAL C-terminal like                                                                                                 |
| 10450948 | 0.019963 | 3.20E-04 | up   | 1.622169 | 0.697924 | 128.2134 | 78.93756 | 9130008F2       | 71583 RIKEN cDNA 9130008F23 gene                                                                                            |
| 10440050 | 0.020007 | 3.23E-04 | down | -1.43197 | -0.518   | 420.0669 | 601.6355 | Tbc1d23         | 67581 TBC1 domain family, member 23                                                                                         |
| 10539769 | 0.020007 | 3.22E-04 | up   | 1.688773 | 0.755975 | 1146.223 | 680.0223 | Nfu1            | 56748 NFU1 iron-sulfur cluster scaffold homolog (S. cerevisiae)                                                             |
| 10568714 | 0.020007 | 3.23E-04 | up   | 1.424507 | 0.510463 | 404.9099 | 284.1924 | Mki67           | 17345 antigen identified by monoclonal antibody Ki 67                                                                       |
| 10465701 | 0.020108 | 3.25E-04 | down | -1.97602 | -0.9826  | 116.8185 | 229.291  | Lgals12         | 56072 lectin, galactose binding, soluble 12                                                                                 |
| 10353272 | 0.020227 | 3.29E-04 | down | -1.63522 | -0.70948 | 336.6663 | 548.6608 | Stau2           | 29819 staufen (RNA binding protein) homolog 2 (Drosophila)                                                                  |
| 10436519 | 0.020227 | 3.30E-04 | down | -1.52728 | -0.61097 | 487.3671 | 743.0893 | Robo1           | 19876 roundabout homolog 1 (Drosophila)                                                                                     |
| 10521566 | 0.020227 | 3.30E-04 | up   | 1.548509 | 0.630879 | 565.8537 | 365.2502 | Tmem128         | 66309 transmembrane protein 128                                                                                             |
| 10529824 | 0.020227 | 3.31E-04 | down | -1.49018 | -0.57549 | 102.3753 | 152.6412 | Prom1 Gm19126   | 10 prominin 1   predicted gene 16401                                                                                        |
| 10537657 | 0.020227 | 3.30E-04 | down | -1.81475 | -0.85977 | 262.1135 | 472.7505 | Ephb6           | 13848 Eph receptor B6                                                                                                       |
| 10385966 | 0.020264 | 3.32E-04 | up   | 1.459112 | 0.545091 | 1490.316 | 1022.19  | Anxa6           | 11749 annexin A6                                                                                                            |
| 10560481 | 0.020332 | 3.34E-04 | down | -2.67885 | -1.42161 | 218.425  | 573.2748 | Fosb            | 14282 FBJ osteosarcoma oncogene B                                                                                           |
| 10396402 | 0.020437 | 3.36E-04 | down | -1.46218 | -0.54812 | 399.4464 | 584.23   | Prkch           | 18755 protein kinase C, eta                                                                                                 |
| 10509992 | 0.02104  | 3.47E-04 | up   | 2.54293  | 1.346492 | 708.4916 | 277.3628 | Hspb7           | 29818 heat shock protein family, member 7 (cardiovascular)                                                                  |
| 10383168 | 0.021099 | 3.49E-04 | up   | 1.440806 | 0.526876 | 986.521  | 684.3425 |                 |                                                                                                                             |
| 10411226 | 0.021159 | 3.51E-04 | up   | 2.32547  | 1.217522 | 467.9925 | 200.732  | F2r1l           | 14063 coagulation factor II (thrombin) receptor-like 1                                                                      |
| 10499095 | 0.021159 | 3.51E-04 | down | -1.43841 | -0.52448 | 403.2995 | 579.8102 | Fam160a1        | 229488 family with sequence similarity 160, member A1                                                                       |
| 10345504 | 0.021354 | 3.56E-04 | down | -1.39632 | -0.48163 | 2657.07  | 3710.066 | Cox5b           | 12859 cytochrome c oxidase, subunit Vb                                                                                      |
| 10419854 | 0.021354 | 3.56E-04 | down | -1.88044 | -0.91107 | 190.055  | 356.8681 | Sic7a8          | 50934 solute carrier family 7 (cationic amino acid transporter, y+ system), member 8                                        |
| 10460259 | 0.021354 | 3.56E-04 | down | -1.51026 | -0.59479 | 1762.858 | 2659.61  | Aldh3b2         | 621603 aldehyde dehydrogenase 3 family, member B2                                                                           |
| 10360398 | 0.021415 | 3.59E-04 | down | -1.95855 | -0.96978 | 531.8843 | 1039.052 | Irf202b         | 26388 interferon activated gene 202B                                                                                        |
| 10383212 | 0.021415 | 3.60E-04 | up   | 1.459971 | 0.545939 | 807.0551 | 552.2782 |                 |                                                                                                                             |
| 10494060 | 0.021415 | 3.59E-04 | up   | 1.420029 | 0.50592  | 391.1352 | 275.4029 | Mrpl9           | 78523 mitochondrial ribosomal protein L9                                                                                    |
| 10427336 | 0.021442 | 3.61E-04 | down | -1.80944 | -0.85554 | 199.4878 | 359.0552 | Nckap1l         | 105855 NCK associated protein 1 like                                                                                        |
| 10460255 | 0.021449 | 3.62E-04 | down | -1.47192 | -0.5577  | 2269.113 | 3336.387 | 1700055Nc       | 73458 RIKEN cDNA 1700055N04 gene                                                                                            |
| 10542872 | 0.021637 | 3.66E-04 | up   | 1.534958 | 0.618199 | 422.9452 | 275.3192 | Rps4y2          | 66184 ribosomal protein S4, Y-linked 2                                                                                      |
| 10371293 | 0.021692 | 3.67E-04 | up   | 1.422293 | 0.508219 | 245.6778 | 172.7001 | 1190007I0       | 544717 RIKEN cDNA 1190007I07 gene                                                                                           |
| 10555179 | 0.021757 | 3.69E-04 | down | -1.74444 | -0.80276 | 575.7911 | 1009.826 | Prkrir          | 72981 protein-kinase, interferon-inducible double stranded RNA dependent inhibitor, repressor of (P58 repressor)            |
| 10447634 | 0.021796 | 3.71E-04 | down | -1.61272 | -0.6895  | 555.3432 | 893.503  | Gm9992 U667055  | 3 predicted gene 9992   unc-93 homolog A (C. elegans)                                                                       |
| 10503334 | 0.021796 | 3.71E-04 | down | -2.03428 | -1.02452 | 748.4942 | 1518.114 | Gem             | 14579 GTP binding protein (gene overexpressed in skeletal muscle)                                                           |
| 10409866 | 0.021848 | 3.73E-04 | down | -1.39474 | -0.48    | 56.08439 | 78.22588 | Ctla2b          | 13025 cytotoxic T lymphocyte-associated protein 2 beta                                                                      |
| 10432404 | 0.022037 | 3.77E-04 | up   | 1.629035 | 0.704018 | 3081.306 | 1898.409 | Tuba1a          | 22142 tubulin, alpha 1A                                                                                                     |
| 10601385 | 0.022305 | 3.82E-04 | down | -1.43616 | -0.52222 | 80.07139 | 115.0676 | Tlr13           | 279572 toll-like receptor 13                                                                                                |
| 10521616 | 0.02234  | 3.84E-04 | up   | 1.406386 | 0.491993 | 193.7398 | 137.7729 | C1qtnf7         | 109323 C1q and tumor necrosis factor related protein 7                                                                      |
| 10350146 | 0.022573 | 3.89E-04 | up   | 1.400607 | 0.486053 | 1866.401 | 1332.669 | Phlda3          | 27280 pleckstrin homology-like domain, family A, member 3                                                                   |
| 10449631 | 0.022573 | 3.89E-04 | down | -1.45538 | -0.5414  | 417.0309 | 606.3485 | Btb9d           | 224671 BTB (POZ) domain containing 9                                                                                        |
| 10358928 | 0.022955 | 3.98E-04 | down | -1.97549 | -0.98221 | 126.3449 | 248.0598 | Cacna1e         | 12290 calcium channel, voltage-dependent, R type, alpha 1E subunit                                                          |
| 10490221 | 0.022955 | 3.98E-04 | up   | 1.665776 | 0.736194 | 496.3055 | 298.9344 | Atp5e           | 67126 ATP synthase, H+ transporting, mitochondrial F1 complex, epsilon subunit                                              |
| 10569830 | 0.022955 | 3.97E-04 | down | -1.48518 | -0.57064 | 347.0829 | 515.5781 | 2310057J16      | 69697 RIKEN cDNA 2310057J16 gene                                                                                            |
| 10434778 | 0.022961 | 3.99E-04 | up   | 1.474552 | 0.560276 | 143.8638 | 97.59326 | Rtp4            | 67775 receptor transporter protein 4                                                                                        |
| 10399677 | 0.02308  | 4.05E-04 | down | -1.55719 | -0.63895 | 583.2452 | 910.0437 | Cox7a2l         | 20463 cytochrome c oxidase subunit VIIa polypeptide 2-like                                                                  |
| 10422227 | 0.02308  | 4.05E-04 | down | -1.62449 | -0.69999 | 405.7769 | 656.8937 | Spry2           | 24064 sprouty homolog 2 (Drosophila)                                                                                        |
| 10430834 | 0.02308  | 4.04E-04 | up   | 1.620267 | 0.696232 | 1011.901 | 623.491  | Naga            | 17939 N-acetyl galactosaminidase, alpha                                                                                     |
| 10474419 | 0.02308  | 4.04E-04 | down | -1.60021 | -0.67826 | 568.6983 | 907.9615 | Lgr4            | 107515 leucine-rich repeat-containing G protein-coupled receptor 4                                                          |
| 10552125 | 0.02308  | 4.04E-04 | down | -1.49032 | -0.57563 | 330.6283 | 492.8592 | Pepd            | 18624 peptidase D                                                                                                           |
| 10395780 | 0.023144 | 4.07E-04 | up   | 1.459848 | 0.545818 | 2511.114 | 1721.113 | 170004711:73385 | 10 RIKEN cDNA 1700047117 gene 1   signal recognition particle 54C   predicted gene 9802   hypothetical protein LOC100048408 |
| 10395770 | 0.023217 | 4.09E-04 | up   | 1.459487 | 0.545462 | 2511.307 | 1721.678 | 170004711:73385 | 10 RIKEN cDNA 1700047117 gene 1   signal recognition particle 54C   predicted gene 9802   hypothetical protein LOC100048408 |
| 10363445 | 0.02323  | 4.10E-04 | down | -1.44509 | -0.53116 | 263.4607 | 381.0061 | 4632428Nc       | 74048 RIKEN cDNA 4632428N05 gene                                                                                            |
| 10460085 | 0.023252 | 4.13E-04 | down | -1.414   | -0.49978 | 771.4225 | 1090.845 | Cndp2           | 66054 CNDP dipeptidase 2 (metallopeptidase M20 family)                                                                      |
| 10466439 | 0.023252 | 4.13E-04 | up   | 1.598142 | 0.676395 | 1015.216 | 634.9174 | Pebp1           | 23980 phosphatidylethanolamine binding protein 1                                                                            |
| 10495285 | 0.023252 | 4.12E-04 | down | -1.9031  | -0.92835 | 315.2584 | 594.6643 | Sort1           | 20661 sortilin 1                                                                                                            |

|          |          |          |      |          |          |          |          |                  |        |                                                                                       |
|----------|----------|----------|------|----------|----------|----------|----------|------------------|--------|---------------------------------------------------------------------------------------|
| 10596454 | 0.023361 | 4.16E-04 | up   | 1.38851  | 0.473538 | 1384.292 | 996.9411 | Alas1            | 11655  | aminolevulinic acid synthase 1                                                        |
| 10431017 | 0.023409 | 4.18E-04 | up   | 1.674063 | 0.743353 | 603.8057 | 359.0612 | Ttl1             | 319953 | tubulin tyrosine ligase-like 1                                                        |
| 10518428 | 0.023469 | 4.21E-04 | down | -1.41201 | -0.49775 | 297.0885 | 419.6316 | Cln6             | 26372  | chloride channel 6                                                                    |
| 10535938 | 0.023469 | 4.20E-04 | down | -1.40854 | -0.4942  | 82.50501 | 116.2287 | N4bp2l1          | 100637 | NEDD4 binding protein 2-like 1                                                        |
| 10544089 | 0.023469 | 4.22E-04 | down | -1.47603 | -0.56172 | 544.6524 | 802.8247 | Zc3hav1          | 78781  | zinc finger CCCH type, antiviral 1                                                    |
| 10547009 | 0.023469 | 4.22E-04 | up   | 1.414912 | 0.500712 | 986.3294 | 696.8178 | Vgll4            | 232334 | vestigial like 4 (Drosophila)                                                         |
| 10581266 | 0.023469 | 4.23E-04 | up   | 1.517713 | 0.601899 | 281.7081 | 185.2955 | Tpp3             | 67971  | tubulin polymerization-promoting protein family member 3                              |
| 10465424 | 0.023485 | 4.24E-04 | down | -1.46843 | -0.55428 | 332.1104 | 487.9755 | Nrxn2 Gm 18190   | 10     | neurexin II   predicted gene 14964                                                    |
| 10586174 | 0.023485 | 4.25E-04 | down | -1.41726 | -0.5031  | 386.1359 | 547.3037 |                  |        |                                                                                       |
| 10427253 | 0.023546 | 4.27E-04 | down | -1.58639 | -0.66575 | 141.88   | 224.5375 | Map3k12          | 26404  | mitogen-activated protein kinase kinase kinase 12                                     |
| 10576911 | 0.023546 | 4.27E-04 | down | -1.65405 | -0.72601 | 748.6847 | 1232.928 | Efnb2            | 13642  | ephrin B2                                                                             |
| 10490129 | 0.023635 | 4.30E-04 | down | -1.61023 | -0.68727 | 840.5869 | 1349.748 | Bmp7             | 12162  | bone morphogenetic protein 7                                                          |
| 10400293 | 0.023769 | 4.33E-04 | up   | 1.479276 | 0.564891 | 348.1301 | 235.6875 | 6530401NC        | 328092 | RIKEN cDNA 6530401N04 gene                                                            |
| 10466587 | 0.023769 | 4.34E-04 | down | -1.75439 | -0.81097 | 76.12672 | 134.2466 | Rorb             | 225998 | RAR-related orphan receptor beta                                                      |
| 10358389 | 0.023946 | 4.38E-04 | down | -1.54829 | -0.63068 | 1602.397 | 2478.486 | Rgs2             | 19735  | regulator of G-protein signaling 2                                                    |
| 10442786 | 0.02418  | 4.43E-04 | down | -1.87642 | -0.90799 | 250.0841 | 470.7464 | Tpsb2            | 17229  | tryptase beta 2                                                                       |
| 10350838 | 0.024245 | 4.47E-04 | up   | 1.375106 | 0.459543 | 406.634  | 295.7111 | 2810417H1        | 68026  | RIKEN cDNA 2810417H13 gene                                                            |
| 10377859 | 0.024245 | 4.49E-04 | up   | 1.430055 | 0.516071 | 1256.147 | 378.082  | Pld2             | 18806  | phospholipase D2                                                                      |
| 10447619 | 0.024245 | 4.48E-04 | up   | 1.380949 | 0.46566  | 514.9802 | 372.9374 | Rshl2a Rsh 66832 | 10     | radial spokehead-like 2A   radial spokehead-like 2B                                   |
| 10466210 | 0.024245 | 4.49E-04 | down | -2.06407 | -1.04549 | 247.0278 | 504.3696 | Ms4a6d           | 68774  | membrane-spanning 4-domains, subfamily A, member 6D                                   |
| 10562251 | 0.024245 | 4.49E-04 | down | -1.3948  | -0.48006 | 415.1868 | 579.2168 | Scn1b            | 20266  | sodium channel, voltage-gated, type I, beta                                           |
| 10586491 | 0.024245 | 4.45E-04 | down | -1.41816 | -0.50402 | 201.7914 | 286.3428 | Dapk2            | 13143  | death-associated protein kinase 2                                                     |
| 10451763 | 0.024273 | 4.51E-04 | down | -1.57539 | -0.65571 | 170.4143 | 268.6041 | Satb1            | 20230  | special AT-rich sequence binding protein 1                                            |
| 10454129 | 0.024328 | 4.53E-04 | up   | 1.596112 | 0.674561 | 2091.704 | 1310.974 | Dsg1b            | 225256 | desmoglein 1 beta                                                                     |
| 10561498 | 0.024328 | 4.53E-04 | up   | 1.453828 | 0.539856 | 1689.083 | 1161.269 | C330005M         | 101744 | RIKEN cDNA C330005M16 gene                                                            |
| 10424363 | 0.024452 | 4.57E-04 | up   | 1.404656 | 0.490217 | 828.6923 | 589.6986 | Nsmce2           | 68501  | non-SMC element 2 homolog (MMS21, S. cerevisiae)                                      |
| 10576854 | 0.024461 | 4.58E-04 | up   | 1.446136 | 0.532203 | 729.03   | 503.6592 | Ctxn1            | 330695 | cortixin 1                                                                            |
| 10445360 | 0.024482 | 4.60E-04 | up   | 1.428266 | 0.514264 | 496.3569 | 347.2412 | Supt3h           | 109115 | suppressor of Ty 3 homolog (S. cerevisiae)                                            |
| 10468668 | 0.024482 | 4.60E-04 | down | -1.535   | -0.61824 | 169.1676 | 259.5392 | Afap1l2          | 226250 | actin filament associated protein 1-like 2                                            |
| 10381096 | 0.024536 | 4.62E-04 | down | -1.52561 | -0.60938 | 1552.513 | 2364.076 | Igfbp4           | 16010  | insulin-like growth factor binding protein 4                                          |
| 10548905 | 0.024546 | 4.63E-04 | down | -1.70013 | -0.76565 | 309.0688 | 528.204  | Eps8             | 13860  | epidermal growth factor receptor pathway substrate 8                                  |
| 10450075 | 0.024555 | 4.64E-04 | up   | 1.375505 | 0.459961 | 1623.926 | 1180.661 | H2-K1            | 14972  | histocompatibility 2, K1, K region                                                    |
| 10345445 | 0.024587 | 4.65E-04 | down | -1.41416 | -0.49994 | 298.3877 | 422.1378 | Arid5a           | 214855 | AT rich interactive domain 5A (MRF1-like)                                             |
| 10349559 | 0.02485  | 4.71E-04 | up   | 1.755575 | 0.811944 | 1106.541 | 632.1387 | Yod1             | 226418 | YOD1 OTU deubiquitinating enzyme 1 homologue (S. cerevisiae)                          |
| 10401841 | 0.024854 | 4.72E-04 | down | -1.4414  | -0.52747 | 110.9831 | 160.0223 | Dio2             | 13371  | deiodinase, iodothyronine, type II                                                    |
| 10404359 | 0.024861 | 4.73E-04 | down | -1.49004 | -0.57535 | 114.1246 | 169.7832 | Mboat1           | 218121 | membrane bound O-acyltransferase domain containing 1                                  |
| 10401343 | 0.025229 | 4.81E-04 | up   | 1.442314 | 0.528385 | 204.8384 | 141.9172 | Map3k9           | 338372 | mitogen-activated protein kinase kinase 9                                             |
| 10507433 | 0.025355 | 4.84E-04 | down | -1.94036 | -0.95632 | 152.4787 | 294.7334 | Ptch2            | 19207  | patched homolog 2                                                                     |
| 10368409 | 0.025395 | 4.86E-04 | down | -1.44151 | -0.52758 | 269.3397 | 388.1821 | Lama2            | 16773  | laminin, alpha 2                                                                      |
| 10539894 | 0.025395 | 4.86E-04 | down | -1.68408 | -0.75196 | 168.0015 | 283.164  | Mgll             | 23945  | monoglyceride lipase                                                                  |
| 10399584 | 0.025519 | 4.91E-04 | up   | 1.626722 | 0.701968 | 106.1109 | 65.09576 | G730007D         | 1E+08  | RIKEN cDNA G730007D18 gene                                                            |
| 10425138 | 0.025519 | 4.91E-04 | down | -1.3979  | -0.48326 | 486.5359 | 679.9194 | Sh3bp1           | 20401  | SH3-domain binding protein 1                                                          |
| 10480649 | 0.025519 | 4.92E-04 | up   | 1.518687 | 0.602824 | 734.7124 | 484.0409 | 2310002J1        | 67859  | RIKEN cDNA 2310002J15 gene                                                            |
| 10358379 | 0.02585  | 5.00E-04 | up   | 1.379442 | 0.464085 | 466.6094 | 338.3135 | Trove2           | 20822  | TROVE domain family, member 2                                                         |
| 10427286 | 0.02585  | 5.01E-04 | up   | 1.416961 | 0.5028   | 163.9913 | 115.77   | Hoxc9            | 15427  | homeo box C9                                                                          |
| 10446928 | 0.02585  | 5.00E-04 | down | -1.45443 | -0.54046 | 427.8471 | 621.8265 | Ltbp1            | 268977 | latent transforming growth factor beta binding protein 1                              |
| 10360563 | 0.026016 | 5.05E-04 | down | -1.38241 | -0.46719 | 229.1132 | 316.6482 | Smyd3            | 69726  | SET and MYND domain containing 3                                                      |
| 10604564 | 0.026133 | 5.08E-04 | down | -1.55544 | -0.63732 | 1120.077 | 1737.018 | Gpc4             | 14735  | glypican 4                                                                            |
| 10390748 | 0.026207 | 5.12E-04 | down | -1.61006 | -0.68711 | 1205.962 | 1946.394 | Tns4             | 217169 | tensin 4                                                                              |
| 10457780 | 0.026207 | 5.12E-04 | down | -1.41514 | -0.50094 | 777.5751 | 1100.096 | Fam59a           | 381126 | family with sequence similarity 59, member A                                          |
| 10537787 | 0.026207 | 5.12E-04 | down | -1.59088 | -0.66982 | 112.2343 | 178.9566 | Tas2r135         | 387512 | taste receptor, type 2, member 135                                                    |
| 10352777 | 0.026211 | 5.13E-04 | down | -1.59867 | -0.67687 | 167.6858 | 268.5804 | Slc30a1 17 22782 | 98     | solute carrier family 30 (zinc transporter), member 1   RIKEN cDNA 1700034H15 gene    |
| 10395805 | 0.026237 | 5.15E-04 | up   | 1.41948  | 0.505363 | 5625.045 | 3961.906 | 1700047I1        | 73385  | RIKEN cDNA 1700047I17 gene 1                                                          |
| 10445412 | 0.026237 | 5.15E-04 | down | -1.39376 | -0.47898 | 250.7086 | 349.4996 | Nfkbie           | 18037  | nuclear factor of kappa light polypeptide gene enhancer in B-cells inhibitor, epsilon |
| 10356520 | 0.026272 | 5.17E-04 | down | -1.43993 | -0.526   | 2716.856 | 3907.876 | Col6a3           | 12835  | collagen, type VI, alpha 3                                                            |
| 10538482 | 0.026272 | 5.18E-04 | up   | 1.375689 | 0.460154 | 134.112  | 97.47352 | Adcyap1r1        | 11517  | adenylate cyclase activating polypeptide 1 receptor 1                                 |
| 10496373 | 0.026361 | 5.21E-04 | up   | 1.413672 | 0.499448 | 135.4929 | 95.82348 | Ddit4l           | 73284  | DNA-damage-inducible transcript 4-like                                                |
| 10347218 | 0.026468 | 5.24E-04 | up   | 2.269724 | 1.182517 | 496.3559 | 215.0188 |                  |        |                                                                                       |
| 10353871 | 0.026676 | 5.29E-04 | up   | 1.457793 | 0.543786 | 457.4688 | 313.5278 | Lman2l           | 214895 | lectin, mannose-binding 2-like                                                        |
| 10360090 | 0.026676 | 5.32E-04 | up   | 1.376969 | 0.461496 | 575.9479 | 418.2347 | Ppox             | 19044  | protoporphyrinogen oxidase                                                            |
| 10378572 | 0.026676 | 5.30E-04 | down | -1.42056 | -0.50646 | 470.8477 | 668.4996 | Tlcd2            | 380712 | TLC domain containing 2                                                               |
| 10563099 | 0.026676 | 5.32E-04 | down | -1.45457 | -0.54059 | 229.4304 | 334.0509 | Snord35b         | 27212  | small nucleolar RNA, C/D box 35B                                                      |
| 10586448 | 0.026676 | 5.31E-04 | up   | 1.609608 | 0.686709 | 147.1921 | 91.75658 | 2810417H1        | 68026  | RIKEN cDNA 2810417H13 gene                                                            |
| 10499108 | 0.026719 | 5.34E-04 | down | -1.37526 | -0.45971 | 277.7531 | 382.051  | Glit2d2          | 320302 | glycosyltransferase 28 domain containing 2                                            |
| 10492330 | 0.026784 | 5.36E-04 | down | -1.49331 | -0.57851 | 178.2729 | 265.9969 | P2ry1            | 18441  | purinergic receptor P2Y, G-protein coupled 1                                          |

|          |          |          |      |          |          |          |          |                  |                                                                                                                                                                    |                                                                                                                  |
|----------|----------|----------|------|----------|----------|----------|----------|------------------|--------------------------------------------------------------------------------------------------------------------------------------------------------------------|------------------------------------------------------------------------------------------------------------------|
| 10437364 | 0.026911 | 5.40E-04 | down | -1.39556 | -0.48085 | 191.4777 | 267.0851 | Adcy9            | 11515                                                                                                                                                              | adenylate cyclase 9                                                                                              |
| 10442643 | 0.026911 | 5.41E-04 | down | -1.40347 | -0.489   | 237.7505 | 333.5227 | Nme3             | 79059                                                                                                                                                              | non-metastatic cells 3, protein expressed in                                                                     |
| 10427297 | 0.027014 | 5.44E-04 | up   | 1.362815 | 0.44659  | 148.2221 | 108.758  | Hoxc5            | 15424                                                                                                                                                              | homeo box C5                                                                                                     |
| 10376899 | 0.027037 | 5.47E-04 | up   | 1.467389 | 0.553248 | 888.3856 | 604.5578 | Trim16 Fb:94092  | 21 tripartite motif-containing 16   F-box and WD-40 domain protein 10                                                                                              |                                                                                                                  |
| 10383206 | 0.027037 | 5.48E-04 | up   | 1.424268 | 0.510221 | 540.6163 | 379.9147 |                  |                                                                                                                                                                    |                                                                                                                  |
| 10395457 | 0.027037 | 5.48E-04 | up   | 1.378283 | 0.462872 | 357.1412 | 259.0578 | Etv1             | 14009                                                                                                                                                              | ets variant gene 1                                                                                               |
| 10419566 | 0.027037 | 5.47E-04 | down | -1.50209 | -0.58697 | 124.3854 | 187.251  | Ang2             | 11731                                                                                                                                                              | angiogenin, ribonuclease A family, member 2                                                                      |
| 10393877 | 0.027109 | 5.50E-04 | down | -1.58647 | -0.66582 | 356.6097 | 565.3296 | Mafg             | 17134                                                                                                                                                              | v-maf musculoaponeurotic fibrosarcoma oncogene family, protein G (avian)                                         |
| 10552245 | 0.027348 | 5.56E-04 | up   | 1.407842 | 0.493485 | 1209.077 | 858.6035 | Tshz3            | 243931                                                                                                                                                             | teashirt zinc finger family member 3                                                                             |
| 10398920 | 0.027504 | 5.60E-04 | down | -1.76761 | -0.8218  | 185.5408 | 325.6261 | BC022687         | 217887                                                                                                                                                             |                                                                                                                  |
| 10365933 | 0.027587 | 5.64E-04 | down | -1.36988 | -0.45405 | 739.8839 | 1013.755 | Eea1             | 216238                                                                                                                                                             | early endosome antigen 1                                                                                         |
| 10408044 | 0.027587 | 5.64E-04 | down | -1.37425 | -0.45865 | 2326.674 | 3196.609 | Cox5b            | 12859                                                                                                                                                              | cytochrome c oxidase, subunit Vb                                                                                 |
| 10363082 | 0.027603 | 5.65E-04 | down | -1.54197 | -0.62477 | 349.9112 | 539.9971 | Lilrb4           | 14728                                                                                                                                                              | leukocyte immunoglobulin-like receptor, subfamily B, member 4                                                    |
| 10438904 | 0.02767  | 5.68E-04 | up   | 1.573706 | 0.654166 | 2026.425 | 1287.511 | Lrrcc15          | 74488                                                                                                                                                              | leucine rich repeat containing 15                                                                                |
| 10607124 | 0.028406 | 5.84E-04 | down | -1.48903 | -0.57438 | 80.96579 | 120.771  | Chrd11           | 83453                                                                                                                                                              | chordin-like 1                                                                                                   |
| 10423836 | 0.028432 | 5.85E-04 | up   | 1.947472 | 0.961602 | 317.4012 | 161.6533 | Cthrc1           | 68588                                                                                                                                                              | collagen triple helix repeat containing 1                                                                        |
| 10398052 | 0.028506 | 5.89E-04 | down | -2.8583  | -1.51516 | 213.7977 | 591.5615 | Serpina3h 546546 | 6 serine (or cysteine) peptidase inhibitor, clade A, member 3H   predicted gene 6930                                                                               |                                                                                                                  |
| 10499363 | 0.028506 | 5.90E-04 | up   | 1.47147  | 0.557258 | 137.2575 | 93.13165 | Bglap1           | 12096                                                                                                                                                              | bone gamma carboxylglutamate protein 1                                                                           |
| 10552064 | 0.028506 | 5.89E-04 | down | -2.18239 | -1.12591 | 2695.062 | 5785.752 | Krtbdap          | 64661                                                                                                                                                              | keratinocyte differentiation associated protein                                                                  |
| 10422244 | 0.02856  | 5.94E-04 | down | -1.41114 | -0.49686 | 58.71344 | 82.78793 | Slitrk6          | 239250                                                                                                                                                             | SLIT and NTRK-like family, member 6                                                                              |
| 10457359 | 0.02856  | 5.92E-04 | down | -1.82679 | -0.86931 | 379.241  | 694.6425 | Mpp7             | 75739                                                                                                                                                              | membrane protein, palmitoylated 7 (MAGUK p55 subfamily member 7)                                                 |
| 10535841 | 0.02856  | 5.95E-04 | down | -1.69168 | -0.75846 | 193.7391 | 325.9668 | Slc46a3          | 17706                                                                                                                                                              | solute carrier family 46, member 3                                                                               |
| 10598976 | 0.02856  | 5.94E-04 | up   | 1.533601 | 0.616923 | 4614.6   | 3018.193 | Timp1            | 21857                                                                                                                                                              | tissue inhibitor of metalloproteinase 1                                                                          |
| 10361091 | 0.028703 | 6.00E-04 | down | -1.97772 | -0.98384 | 791.0063 | 1549.926 | Atf3             | 11910                                                                                                                                                              | activating transcription factor 3                                                                                |
| 10376142 | 0.028703 | 6.06E-04 | up   | 1.517059 | 0.601277 | 2157.354 | 1424.108 | 3230401D1        | 66680                                                                                                                                                              | RIKEN cDNA 3230401D17 gene                                                                                       |
| 10420247 | 0.028703 | 5.99E-04 | down | -2.52587 | -1.33678 | 116.0458 | 298.7008 | Mcpt4            | 17227                                                                                                                                                              | mast cell protease 4                                                                                             |
| 10450265 | 0.028703 | 6.06E-04 | up   | 1.394636 | 0.479889 | 270.0693 | 193.5889 | Stk19            | 54402                                                                                                                                                              | serine/threonine kinase 19                                                                                       |
| 10454077 | 0.028703 | 6.05E-04 | down | -1.54582 | -0.62837 | 187.5165 | 289.7641 | Taf4b            | 72504                                                                                                                                                              | TAF4B RNA polymerase II, TATA box binding protein (TBP)-associated factor                                        |
| 10467508 | 0.028703 | 6.07E-04 | down | -1.70876 | -0.77295 | 100.9601 | 172.1518 | Blink            | 17060                                                                                                                                                              | B-cell linker                                                                                                    |
| 10499378 | 0.028703 | 6.07E-04 | down | -1.51995 | -0.60403 | 113.9883 | 173.2763 | Sema4a           | 20351                                                                                                                                                              | sema domain, immunoglobulin domain (Ig), transmembrane domain (TM) and short cytoplasmic domain, (semaphorin) 4A |
| 10560624 | 0.028703 | 6.08E-04 | down | -2.73474 | -1.4514  | 2522.183 | 6691.249 | Apoe             | 11816                                                                                                                                                              | apolipoprotein E                                                                                                 |
| 10578377 | 0.028703 | 6.01E-04 | up   | 1.520128 | 0.604193 | 816.6905 | 538.1107 | Frg1             | 14300                                                                                                                                                              | FSHD region gene 1                                                                                               |
| 10582582 | 0.028703 | 6.06E-04 | down | -1.65836 | -0.72976 | 69.93412 | 116.1455 |                  |                                                                                                                                                                    |                                                                                                                  |
| 10477022 | 0.028738 | 6.09E-04 | up   | 2.274083 | 1.185285 | 855.3292 | 369.2159 | Sdcbp2           | 228765                                                                                                                                                             | syndecan binding protein (syntenin) 2                                                                            |
| 10582584 | 0.028809 | 6.12E-04 | down | -1.65986 | -0.73107 | 69.94226 | 116.268  |                  |                                                                                                                                                                    |                                                                                                                  |
| 10368175 | 0.029561 | 6.29E-04 | up   | 1.353625 | 0.436828 | 928.6745 | 686.0425 | Pde7b            | 29863                                                                                                                                                              | phosphodiesterase 7B                                                                                             |
| 10570610 | 0.029561 | 6.30E-04 | up   | 2.83808  | 1.504915 | 204.867  | 70.11442 | Defb4            | 56519                                                                                                                                                              | defensin beta 4                                                                                                  |
| 10382104 | 0.029755 | 6.35E-04 | down | -1.41536 | -0.50117 | 1243.315 | 1761.233 |                  |                                                                                                                                                                    |                                                                                                                  |
| 10357808 | 0.029784 | 6.37E-04 | down | -1.45336 | -0.53939 | 983.7471 | 1432.214 | Snrpe            | 20643                                                                                                                                                              | small nuclear ribonucleoprotein E                                                                                |
| 10367775 | 0.029796 | 6.39E-04 | down | -1.52596 | -0.60972 | 821.9995 | 1256.002 | Stxbp5           | 78808                                                                                                                                                              | syntaxin binding protein 5 (tomosyn)                                                                             |
| 10583044 | 0.029796 | 6.40E-04 | up   | 1.445842 | 0.53191  | 5149.192 | 3567.076 | Mmp13            | 17386                                                                                                                                                              | matrix metalloproteinase 13                                                                                      |
| 10603147 | 0.029796 | 6.40E-04 | down | -1.35132 | -0.43437 | 51.95883 | 70.20846 | Gemin8           | 237221                                                                                                                                                             | gem (nuclear organelle) associated protein 8                                                                     |
| 10539200 | 0.029939 | 6.45E-04 | down | -5.45039 | -2.44636 | 199.626  | 993.6894 | Reg1             | 19692                                                                                                                                                              | regenerating islet-derived 1                                                                                     |
| 10584595 | 0.029939 | 6.45E-04 | up   | 1.424153 | 0.510105 | 850.3645 | 596.7426 | 2610203C2        | 70455                                                                                                                                                              | RIKEN cDNA 2610203C20 gene                                                                                       |
| 10545101 | 0.030038 | 6.49E-04 | down | -2.27331 | -1.18479 | 241.6509 | 539.8689 | Hpgds            | 54486                                                                                                                                                              | hematopoietic prostaglandin D synthase                                                                           |
| 10590438 | 0.030038 | 6.49E-04 | down | -1.4958  | -0.58091 | 74.64848 | 111.3972 | C730027P0        | 245050                                                                                                                                                             | RIKEN cDNA C730027P07 gene                                                                                       |
| 10356145 | 0.030056 | 6.52E-04 | down | -1.53462 | -0.61788 | 59.83583 | 92.10122 | Slc19a3          | 80721                                                                                                                                                              | solute carrier family 19 (sodium/hydrogen exchanger), member 3                                                   |
| 10431637 | 0.030056 | 6.56E-04 | down | -1.77027 | -0.82397 | 225.7432 | 397.2705 | Cpne8            | 66871                                                                                                                                                              | copine VIII                                                                                                      |
| 10533751 | 0.030056 | 6.55E-04 | down | -1.35864 | -0.44216 | 258.8211 | 351.6121 | Pitpnm2          | 19679                                                                                                                                                              | phosphatidylinositol transfer protein, membrane-associated 2                                                     |
| 10550980 | 0.030056 | 6.54E-04 | down | -1.58948 | -0.66856 | 2512.478 | 3978.992 | Lypd3            | 72434                                                                                                                                                              | Ly6/Plaur domain containing 3                                                                                    |
| 10576639 | 0.030056 | 6.55E-04 | down | -1.51447 | -0.59882 | 448.8426 | 680.9053 | Nrp1             | 18186                                                                                                                                                              | neuropilin 1                                                                                                     |
| 10584870 | 0.030056 | 6.55E-04 | up   | 1.50762  | 0.592273 | 1518.757 | 1010.147 | Tmprss13         | 214531                                                                                                                                                             | transmembrane protease, serine 13                                                                                |
| 10384725 | 0.030072 | 6.62E-04 | down | -1.58993 | -0.66896 | 642.2161 | 1022.363 | Rel              | 19696                                                                                                                                                              | reticuloendotheliosis oncogene                                                                                   |
| 10416199 | 0.030072 | 6.61E-04 | up   | 1.512136 | 0.596588 | 1548.004 | 1020.839 | Entpd4           | 67464                                                                                                                                                              | ectonucleoside triphosphate diphosphohydrolase 4                                                                 |
| 10458340 | 0.030072 | 6.59E-04 | down | -1.60837 | -0.6856  | 1006.35  | 1616.002 | Hbegf            | 15200                                                                                                                                                              | heparin-binding EGF-like growth factor                                                                           |
| 10489434 | 0.030072 | 6.63E-04 | down | -1.34417 | -0.42672 | 55.46509 | 74.55403 | Wfdc12           | 192200                                                                                                                                                             | WAP four-disulfide core domain 12                                                                                |
| 10518335 | 0.030072 | 6.59E-04 | up   | 1.369345 | 0.453486 | 1080.709 | 789.4395 | 170002910:70005  | 43 RIKEN cDNA 1700029101 gene   predicted gene 13251   predicted gene, OTTMUSG0000010657   predicted gene 13051   predicted gene 13159   predicted gene 13151   pr |                                                                                                                  |
| 10566488 | 0.030072 | 6.60E-04 | up   | 1.356589 | 0.439984 | 976.3176 | 719.7752 | Trim3            | 55992                                                                                                                                                              | tripartite motif-containing 3                                                                                    |
| 10461587 | 0.030105 | 6.65E-04 | down | -2.02348 | -1.01684 | 67.09906 | 136.8863 | Ms4a4a           | 666907                                                                                                                                                             | membrane-spanning 4-domains, subfamily A, member 4A                                                              |
| 10520622 | 0.030105 | 6.69E-04 | down | -1.66215 | -0.73305 | 213.6759 | 356.2715 | Abhd1            | 57742                                                                                                                                                              | abhydrolase domain containing 1                                                                                  |
| 10538802 | 0.030105 | 6.67E-04 | down | -1.4389  | -0.52497 | 110.1375 | 158.725  | A930038CC        | 68169                                                                                                                                                              | RIKEN cDNA A930038C07 gene                                                                                       |
| 10542470 | 0.030105 | 6.68E-04 | down | -1.455   | -0.54102 | 1250.813 | 1823.116 | Mgst1            | 56615                                                                                                                                                              | microsomal glutathione S-transferase 1                                                                           |
| 10586616 | 0.030105 | 6.68E-04 | down | -1.5222  | -0.60615 | 346.8315 | 526.3874 | Vps13c           | 320528                                                                                                                                                             | vacuolar protein sorting 13C (yeast)                                                                             |
| 10427816 | 0.030134 | 6.70E-04 | down | -1.6541  | -0.72604 | 211.6066 | 348.426  | Pdzd2            | 68070                                                                                                                                                              | PDZ domain containing 2                                                                                          |
| 10466888 | 0.03015  | 6.72E-04 | down | -1.36207 | -0.4458  | 1479.782 | 2015.989 | Glis3            | 226075                                                                                                                                                             | GLIS family zinc finger 3                                                                                        |

|          |          |          |      |          |          |          |          |            |         |                                                                                                                    |
|----------|----------|----------|------|----------|----------|----------|----------|------------|---------|--------------------------------------------------------------------------------------------------------------------|
| 10565634 | 0.030168 | 6.73E-04 | up   | 1.433407 | 0.519449 | 508.4275 | 354.7451 | Myo7a      | 17921   | myosin VIIA                                                                                                        |
| 10383192 | 0.030289 | 6.77E-04 | up   | 1.872691 | 0.905113 | 296.2873 | 157.8356 |            |         |                                                                                                                    |
| 10591494 | 0.030481 | 6.82E-04 | down | -1.35781 | -0.44128 | 93.62479 | 127.095  | S1pr5      | 94226   | sphingosine-1-phosphate receptor 5                                                                                 |
| 10425012 | 0.030519 | 6.84E-04 | up   | 1.360013 | 0.44362  | 122.8246 | 90.29227 | Zfp7       | 223669  | zinc finger protein 7                                                                                              |
| 10464391 | 0.030519 | 6.85E-04 | up   | 1.396049 | 0.481349 | 181.8715 | 130.2435 | Emx2       | 13797   | empty spiracles homolog 2 (Drosophila)                                                                             |
| 10484371 | 0.030536 | 6.87E-04 | up   | 1.807111 | 0.853685 | 810.5278 | 449.7212 | Calcr1     | 54598   | calcitonin receptor-like                                                                                           |
| 10452419 | 0.030654 | 6.90E-04 | down | -1.39402 | -0.47925 | 758.4832 | 1057.108 | EfnA5      | 13640   | ephrin A5                                                                                                          |
| 10488322 | 0.030661 | 6.92E-04 | down | -1.54216 | -0.62495 | 527.3899 | 815.4276 | A230067G;  | 241694  | RIKEN cDNA A230067G21 gene                                                                                         |
| 10606714 | 0.030873 | 6.97E-04 | down | -1.42757 | -0.51356 | 1229.886 | 1757.726 | Gla        | 11605   | galactosidase, alpha                                                                                               |
| 10406171 | 0.030904 | 7.00E-04 | down | -1.34027 | -0.42253 | 112.3652 | 150.5985 | Tppp       | 72948   | tubulin polymerization promoting protein                                                                           |
| 10462140 | 0.030904 | 7.01E-04 | down | -1.69735 | -0.76328 | 121.9637 | 208.319  | Dock8      | 76088   | dedicator of cytokinesis 8                                                                                         |
| 10545168 | 0.030904 | 7.01E-04 | down | -1.36952 | -0.45367 | 2412.76  | 3303.093 | Tacstd2    | 56753   | tumor-associated calcium signal transducer 2                                                                       |
| 10419154 | 0.030933 | 7.05E-04 | down | -2.96576 | -1.5684  | 75.53956 | 232.7624 | Ear1 Ear1C | 13586   | 93 eosinophil-associated, ribonuclease A family, member 1   eosinophil-associated, ribonuclease A family, member 2 |
| 10497817 | 0.030933 | 7.05E-04 | up   | 1.381741 | 0.466487 | 6728.161 | 4870.212 | Anxa5      | 11747   | annexin A5                                                                                                         |
| 10556487 | 0.030933 | 7.05E-04 | down | -1.41111 | -0.49683 | 227.5813 | 320.8263 | A630005I0  | 320743  | RIKEN cDNA A630005I04 gene                                                                                         |
| 10527475 | 0.031121 | 7.11E-04 | down | -1.3408  | -0.4231  | 792.1696 | 1062.125 | Zfp655     | 72611   | zinc finger protein 655                                                                                            |
| 10395320 | 0.031147 | 7.14E-04 | down | -1.36087 | -0.44453 | 267.221  | 363.5239 | Twist1     | 22160   | twist homolog 1 (Drosophila)                                                                                       |
| 10485597 | 0.031147 | 7.13E-04 | down | -1.53973 | -0.62268 | 62.78362 | 97.01982 | Depdc7     | 211896  | DEP domain containing 7                                                                                            |
| 10493850 | 0.031147 | 7.13E-04 | up   | 1.564604 | 0.645798 | 10192.54 | 6495.341 | Spr2a Spr  | 20755   | 10 small proline-rich protein 2A   small proline-rich protein 2A3                                                  |
| 10399202 | 0.031271 | 7.18E-04 | down | -1.42816 | -0.51416 | 93.9086  | 134.0502 | Maccr1     | 238455  | metastasis associated in colon cancer 1                                                                            |
| 10590298 | 0.031304 | 7.20E-04 | up   | 1.62437  | 0.69988  | 883.3093 | 541.0075 | Eif1b      | 68969   | eukaryotic translation initiation factor 1B                                                                        |
| 10384138 | 0.031439 | 7.26E-04 | up   | 1.346528 | 0.429245 | 2014.559 | 1496.06  | Tmed4      | 103694  | transmembrane emp24 protein transport domain containing 4                                                          |
| 10585286 | 0.031439 | 7.26E-04 | up   | 1.434025 | 0.52007  | 186.6194 | 129.9939 | Arhgap20   | 244867  | Rho GTPase activating protein 20                                                                                   |
| 10379524 | 0.031476 | 7.28E-04 | down | -2.21951 | -1.15024 | 717.8075 | 1577.411 | Ccl11      | 20292   | chemokine (C-C motif) ligand 11                                                                                    |
| 10599927 | 0.031511 | 7.29E-04 | down | -1.43488 | -0.52093 | 160.8174 | 230.4303 | Aff2       | 14266   | AF4/FMR2 family, member 2                                                                                          |
| 10447904 | 0.031623 | 7.33E-04 | down | -1.74903 | -0.80655 | 513.3122 | 890.9047 | Unc93a Gr  | 1381058 | 6 unc-93 homolog A (C. elegans)   predicted gene 9992                                                              |
| 10561025 | 0.031773 | 7.38E-04 | up   | 2.273554 | 1.184949 | 7099.521 | 3064.852 | Cnfn       | 72383   | cornifelin                                                                                                         |
| 10593713 | 0.031909 | 7.42E-04 | down | -1.50042 | -0.58537 | 311.7226 | 467.5897 | Cib2       | 56506   | calcium and integrin binding family member 2                                                                       |
| 10564795 | 0.032063 | 7.47E-04 | down | -2.5672  | -1.36019 | 315.085  | 791.4212 | Plin1      | 103968  | perilipin 1                                                                                                        |
| 10580577 | 0.032125 | 7.49E-04 | down | -1.41606 | -0.50188 | 272.8591 | 386.8571 | Irx3       | 16373   | Iroquois related homeobox 3 (Drosophila)                                                                           |
| 10396148 | 0.032132 | 7.51E-04 | down | -2.27921 | -1.18854 | 106.867  | 241.2362 | Abhd12b    | 328121  | abhydrolase domain containing 12B                                                                                  |
| 10489092 | 0.032132 | 7.52E-04 | down | -1.3712  | -0.45544 | 180.7113 | 247.6463 | 9830001HC  | 320706  | RIKEN cDNA 9830001H06 gene                                                                                         |
| 10401428 | 0.032178 | 7.54E-04 | down | -1.38791 | -0.47292 | 412.167  | 572.4565 | C130039O;  | 238317  | RIKEN cDNA C130039O16 gene                                                                                         |
| 10514466 | 0.032422 | 7.62E-04 | down | -1.48311 | -0.56863 | 1985.286 | 2951.048 | Jun        | 16476   |                                                                                                                    |
| 10551614 | 0.032422 | 7.62E-04 | down | -1.39705 | -0.48238 | 1335.15  | 1865.889 | Ech1       | 51798   | enoyl coenzyme A hydratase 1, peroxisomal                                                                          |
| 10360270 | 0.032427 | 7.64E-04 | up   | 2.102618 | 1.072187 | 540.8907 | 260.5472 | Atp1a2     | 98660   | ATPase, Na <sup>+</sup> /K <sup>+</sup> transporting, alpha 2 polypeptide                                          |
| 10517666 | 0.032427 | 7.63E-04 | up   | 1.400597 | 0.486042 | 197.8929 | 141.2218 | Otdud3     | 73162   | OTU domain containing 3                                                                                            |
| 10352234 | 0.032663 | 7.77E-04 | down | -1.72413 | -0.78587 | 643.1994 | 1117.746 | Itpkb      | 320404  | inositol 1,4,5-trisphosphate 3-kinase B                                                                            |
| 10358027 | 0.032663 | 7.74E-04 | up   | 1.557745 | 0.639459 | 135.4241 | 86.95336 | Elf3       | 13710   | E74-like factor 3                                                                                                  |
| 10385635 | 0.032663 | 7.74E-04 | up   | 1.335176 | 0.417029 | 282.5248 | 211.6009 | Zfp354c    | 30944   | zinc finger protein 354C                                                                                           |
| 10399470 | 0.032663 | 7.75E-04 | up   | 1.356676 | 0.440076 | 357.3633 | 263.4926 | Trib2      | 217410  | tribbles homolog 2 (Drosophila)                                                                                    |
| 10407122 | 0.032663 | 7.76E-04 | down | -1.64028 | -0.71394 | 98.48788 | 160.8528 |            |         |                                                                                                                    |
| 10496592 | 0.032663 | 7.78E-04 | up   | 1.383686 | 0.468517 | 123.927  | 89.59595 | Gbp2       | 14469   | guanylate binding protein 2                                                                                        |
| 10599008 | 0.032663 | 7.74E-04 | down | -1.76796 | -0.82209 | 134.1752 | 237.7695 | Slc6a14    | 56774   | solute carrier family 6 (neurotransmitter transporter), member 14                                                  |
| 10384780 | 0.032679 | 7.79E-04 | up   | 1.34054  | 0.422814 | 283.954  | 211.8121 | Fancl      | 67030   | Fanconi anemia, complementation group L                                                                            |
| 10456435 | 0.032726 | 7.82E-04 | down | -1.56505 | -0.64621 | 191.5673 | 298.5244 |            |         |                                                                                                                    |
| 10530633 | 0.032726 | 7.83E-04 | up   | 1.366553 | 0.450541 | 894.9206 | 655.1484 | Sgcb       | 24051   | sarcoglycan, beta (dystrophin-associated glycoprotein)                                                             |
| 10463355 | 0.032761 | 7.85E-04 | up   | 1.80414  | 0.851311 | 3082.328 | 1698.375 | Scd2       | 20250   | stearoyl-Coenzyme A desaturase 2                                                                                   |
| 10519012 | 0.032761 | 7.86E-04 | down | -1.37843 | -0.46302 | 108.938  | 150.2809 | Arhgef16   | 230972  | Rho guanine nucleotide exchange factor (GEF) 16                                                                    |
| 10556242 | 0.032959 | 7.92E-04 | down | -1.42944 | -0.51545 | 674.0832 | 964.6036 |            |         |                                                                                                                    |
| 10560919 | 0.032994 | 7.94E-04 | down | -1.40616 | -0.49176 | 102.5717 | 144.4149 | Atp1a3     | 232975  | ATPase, Na <sup>+</sup> /K <sup>+</sup> transporting, alpha 3 polypeptide                                          |
| 10491058 | 0.033065 | 7.96E-04 | up   | 1.517094 | 0.60131  | 705.0345 | 466.2563 | Rpr12      | 19784   | ribonuclease P RNA-like 2                                                                                          |
| 10360130 | 0.033165 | 8.03E-04 | up   | 1.410167 | 0.495866 | 1292.368 | 917.7186 | Nit1 Dedd  | 27045   | 21 nitrilase 1   death effector domain-containing                                                                  |
| 10375432 | 0.033165 | 8.00E-04 | down | -1.59783 | -0.67612 | 63.2359  | 101.1676 | Cyfp2 C03  | 76884   | 32 cytoplasmic FMR1 interacting protein 2   RIKEN cDNA C030019I05 gene                                             |
| 10395978 | 0.033165 | 8.02E-04 | down | -1.40816 | -0.49381 | 115.9803 | 163.5382 | Gm527      | 217648  | predicted gene 527                                                                                                 |
| 10508986 | 0.033165 | 8.02E-04 | up   | 1.470195 | 0.556008 | 866.8094 | 591.0674 | Stmn1      | 16765   | stathmin 1                                                                                                         |
| 10368270 | 0.033196 | 8.06E-04 | down | -1.34896 | -0.43184 | 2684.905 | 3622.988 | Rps12 Gm   | 20042   | 67 ribosomal protein S12   predicted gene 10063                                                                    |
| 10512022 | 0.033196 | 8.06E-04 | down | -1.52273 | -0.60666 | 101.2323 | 153.8311 | Mobkl2b    | 214944  | MOB1, Mps One Binder kinase activator-like 2B (yeast)                                                              |
| 10389207 | 0.033275 | 8.09E-04 | up   | 1.467089 | 0.552956 | 190.8418 | 130.2532 | Ccl5       | 20304   | chemokine (C-C motif) ligand 5                                                                                     |
| 10511725 | 0.03332  | 8.12E-04 | up   | 1.529096 | 0.612679 | 819.0346 | 537.6313 | Cyb5r4     | 266690  | cytochrome b5 reductase 4                                                                                          |
| 10345065 | 0.033393 | 8.17E-04 | down | -2.4807  | -1.31074 | 194.4364 | 470.1575 | Gsta3      | 14859   | glutathione S-transferase, alpha 3                                                                                 |
| 10565873 | 0.033393 | 8.15E-04 | up   | 1.333386 | 0.415094 | 1238.267 | 928.5959 | Ppme1      | 72590   | protein phosphatase methyltransferase 1                                                                            |
| 10569038 | 0.033393 | 8.17E-04 | down | -3.0806  | -1.62321 | 310.9556 | 918.8702 | Ano9       | 71345   | anoctamin 9                                                                                                        |
| 10572130 | 0.033526 | 8.21E-04 | down | -1.78931 | -0.8394  | 4591.733 | 8136.808 | Lpl        | 16956   | lipoprotein lipase                                                                                                 |
| 10362359 | 0.033552 | 8.23E-04 | up   | 1.550024 | 0.63229  | 1045.222 | 673.9783 | Pebp1      | 23980   | phosphatidylethanolamine binding protein 1                                                                         |

|          |          |          |      |          |          |          |          |                  |                                                                                                                                                                              |                                                                            |
|----------|----------|----------|------|----------|----------|----------|----------|------------------|------------------------------------------------------------------------------------------------------------------------------------------------------------------------------|----------------------------------------------------------------------------|
| 10398814 | 0.033553 | 8.24E-04 | down | -1.39158 | -0.47672 | 186.4811 | 259.3858 | Kif26a           | 668303                                                                                                                                                                       | kinesin family member 26A                                                  |
| 10508405 | 0.033561 | 8.26E-04 | down | -1.55621 | -0.63803 | 684.2692 | 1063.275 | Tmem54           | 66260                                                                                                                                                                        | transmembrane protein 54                                                   |
| 10489053 | 0.033572 | 8.27E-04 | up   | 1.655861 | 0.727582 | 110.4612 | 66.91368 | 493051811!       | 74704                                                                                                                                                                        | RIKEN cDNA 4930518115 gene                                                 |
| 10531022 | 0.033616 | 8.29E-04 | down | -1.48927 | -0.5746  | 660.0217 | 982.0357 | Tmprss11e        | 243084                                                                                                                                                                       | transmembrane protease, serine 11e                                         |
| 10385361 | 0.033628 | 8.31E-04 | up   | 1.381913 | 0.466667 | 176.5501 | 127.7948 | Ublcp1           | 79560                                                                                                                                                                        | ubiquitin-like domain containing CTD phosphatase 1                         |
| 10524248 | 0.033632 | 8.32E-04 | down | -1.47217 | -0.55794 | 213.5758 | 314.8525 | Ddx51            | 69663                                                                                                                                                                        | DEAD (Asp-Glu-Ala-Asp) box polypeptide 51                                  |
| 10367746 | 0.033735 | 8.37E-04 | down | -1.34721 | -0.42997 | 802.419  | 1081.064 | Sash1            | 70097                                                                                                                                                                        | SAM and SH3 domain containing 1                                            |
| 10502791 | 0.033735 | 8.36E-04 | up   | 1.475454 | 0.561159 | 303.435  | 205.1429 | Ifi44            | 99899                                                                                                                                                                        | interferon-induced protein 44                                              |
| 10531208 | 0.033772 | 8.40E-04 | down | -1.37487 | -0.45929 | 1201.393 | 1651.664 | Cox18            | 231430                                                                                                                                                                       | COX18 cytochrome c oxidase assembly homolog (S. cerevisiae)                |
| 10576235 | 0.033772 | 8.40E-04 | up   | 2.097648 | 1.068772 | 1285.748 | 613.4679 | Dpep1            | 13479                                                                                                                                                                        | dipeptidase 1 (renal)                                                      |
| 10360406 | 0.033852 | 8.43E-04 | up   | 1.845637 | 0.884119 | 123.3139 | 66.93017 | Ifi205           | 226695                                                                                                                                                                       | interferon activated gene 205                                              |
| 10428619 | 0.033933 | 8.48E-04 | down | -1.90085 | -0.92665 | 827.4142 | 1577.92  | Enpp2            | 18606                                                                                                                                                                        | ectonucleotide pyrophosphatase/phosphodiesterase 2                         |
| 10566182 | 0.033933 | 8.47E-04 | up   | 1.405007 | 0.490577 | 132.9379 | 94.53005 | Olfrr566         | 258168                                                                                                                                                                       | olfactory receptor 566                                                     |
| 10402268 | 0.034047 | 8.54E-04 | down | -1.43603 | -0.52208 | 1378.288 | 1979.429 | Lgmn             | 19141                                                                                                                                                                        | legumain                                                                   |
| 10431711 | 0.034047 | 8.55E-04 | down | -1.35107 | -0.4341  | 706.2956 | 953.8772 | Slc2a13          | 239606                                                                                                                                                                       | solute carrier family 2 (facilitated glucose transporter), member 13       |
| 10513818 | 0.034047 | 8.55E-04 | up   | 1.448638 | 0.534697 | 802.6662 | 555.2387 | Stmn1            | 16765                                                                                                                                                                        | stathmin 1                                                                 |
| 10547282 | 0.034047 | 8.54E-04 | up   | 1.36376  | 0.44759  | 314.7285 | 230.6511 | Zfp9             | 22750                                                                                                                                                                        | zinc finger protein 9                                                      |
| 10492522 | 0.034206 | 8.61E-04 | up   | 1.354846 | 0.438129 | 448.6768 | 331.0058 | Schip1           | 30953                                                                                                                                                                        | schwannomin interacting protein 1                                          |
| 10505143 | 0.034466 | 8.70E-04 | down | -1.40963 | -0.49532 | 203.4623 | 286.4006 | Akap2 Palr11641  | 67 A kinase (PKA) anchor protein 2   Palr2                                                                                                                                   | Akap2 readthrough transcript                                               |
| 10548892 | 0.034466 | 8.71E-04 | up   | 1.473613 | 0.559358 | 3378.478 | 2292.222 | Arhgdib          | 11857                                                                                                                                                                        | Rho, GDP dissociation inhibitor (GDI) beta                                 |
| 10586390 | 0.034466 | 8.69E-04 | up   | 1.33054  | 0.412012 | 185.5993 | 139.4762 | Rasl12           | 70784                                                                                                                                                                        | RAS-like, family 12                                                        |
| 10447361 | 0.034689 | 8.79E-04 | down | -1.46125 | -0.5472  | 206.9467 | 301.765  | Ttc7             | 225049                                                                                                                                                                       | tetratricopeptide repeat domain 7                                          |
| 10572146 | 0.034689 | 8.79E-04 | down | -1.33826 | -0.42035 | 3113.766 | 4167.124 | Atp6v1b2         | 11966                                                                                                                                                                        | ATPase, H+ transporting, lysosomal V1 subunit B2                           |
| 10541071 | 0.034759 | 8.82E-04 | up   | 1.691788 | 0.758548 | 140.9756 | 82.90587 | 8430408G2        | 213393                                                                                                                                                                       | RIKEN cDNA 8430408G22 gene                                                 |
| 10492590 | 0.034905 | 8.87E-04 | up   | 1.393214 | 0.478417 | 376.172  | 269.671  | Ppm1l            | 242083                                                                                                                                                                       | protein phosphatase 1 (formerly 2C)-like                                   |
| 10419156 | 0.035102 | 8.93E-04 | down | -3.03357 | -1.60102 | 71.94848 | 227.9598 | Ear10 Ear293725  | 13 eosinophil-associated, ribonuclease A family, member 10   eosinophil-associated, ribonuclease A family, member 2   eosinophil-associated, ribonuclease A family, member 1 |                                                                            |
| 10513884 | 0.035122 | 8.95E-04 | down | -1.35653 | -0.43992 | 130.8228 | 177.3661 | Tle1             | 21885                                                                                                                                                                        | transducin-like enhancer of split 1, homolog of Drosophila Elspl           |
| 10367744 | 0.035315 | 9.02E-04 | down | -1.66441 | -0.73501 | 55.12618 | 91.22444 | LOC62944E        | 629446                                                                                                                                                                       | gag protein                                                                |
| 10462535 | 0.035315 | 9.02E-04 | up   | 1.392172 | 0.477337 | 170.1618 | 122.2812 | B430203M         | 320193                                                                                                                                                                       | RIKEN cDNA B430203M17 gene                                                 |
| 10479185 | 0.035315 | 9.04E-04 | up   | 1.383949 | 0.468791 | 106.6102 | 77.07852 |                  |                                                                                                                                                                              |                                                                            |
| 10511446 | 0.035315 | 9.04E-04 | up   | 1.327404 | 0.408607 | 375.7231 | 283.0651 | Asph             | 65973                                                                                                                                                                        | aspartate-beta-hydroxylase                                                 |
| 10389222 | 0.035461 | 9.10E-04 | down | -1.51101 | -0.59551 | 520.4487 | 789.2339 | Ccl6             | 20305                                                                                                                                                                        | chemokine (C-C motif) ligand 6                                             |
| 10592099 | 0.035461 | 9.11E-04 | down | -1.50122 | -0.58614 | 329.2089 | 492.5825 | Dcps             | 69305                                                                                                                                                                        | decapping enzyme, scavenger                                                |
| 10565813 | 0.035619 | 9.16E-04 | down | -1.52815 | -0.61178 | 109.7037 | 168.2225 | Gm5774           | 449630                                                                                                                                                                       | predicted gene 5774                                                        |
| 10357280 | 0.035661 | 9.18E-04 | down | -1.40837 | -0.49403 | 1295.101 | 1822.354 | Insig2           | 72999                                                                                                                                                                        | insulin induced gene 2                                                     |
| 10414993 | 0.035732 | 9.23E-04 | up   | 1.569944 | 0.650713 | 98.18549 | 62.2914  | A630038E1        | 219065                                                                                                                                                                       | RIKEN cDNA A630038E17 gene                                                 |
| 10489364 | 0.035732 | 9.22E-04 | up   | 1.561737 | 0.643151 | 2039.678 | 1305.323 | 3230401D1        | 66680                                                                                                                                                                        | RIKEN cDNA 3230401D17 gene                                                 |
| 10590263 | 0.035785 | 9.25E-04 | down | -1.54951 | -0.63181 | 127.6464 | 198.5072 |                  |                                                                                                                                                                              |                                                                            |
| 10415885 | 0.035884 | 9.30E-04 | down | -2.11671 | -1.08182 | 265.6611 | 570.8889 | Sox7             | 20680                                                                                                                                                                        | SRY-box containing gene 7                                                  |
| 10469425 | 0.035884 | 9.30E-04 | down | -1.45918 | -0.54516 | 1368.251 | 2001.397 | Arl5b            | 75869                                                                                                                                                                        | ADP-ribosylation factor-like 5B                                            |
| 10404731 | 0.036254 | 9.41E-04 | down | -1.46339 | -0.54931 | 558.2325 | 818.2097 | Tmem14c          | 66154                                                                                                                                                                        | transmembrane protein 14C                                                  |
| 10391332 | 0.036321 | 9.44E-04 | down | -1.3673  | -0.45133 | 1297.285 | 1773.168 | Ptrf             | 19285                                                                                                                                                                        | polymerase I and transcript release factor                                 |
| 10504775 | 0.03638  | 9.47E-04 | down | -1.76237 | -0.81752 | 292.6452 | 516.7364 | Col15a1          | 12819                                                                                                                                                                        | collagen, type XV, alpha 1                                                 |
| 10576332 | 0.03638  | 9.48E-04 | up   | 1.539879 | 0.622817 | 78.80217 | 50.9664  | Tubb3            | 22152                                                                                                                                                                        | tubulin, beta 3                                                            |
| 10356475 | 0.03646  | 9.52E-04 | down | -1.37735 | -0.4619  | 110.2088 | 151.9157 | Arl4c            | 320982                                                                                                                                                                       | ADP-ribosylation factor-like 4C                                            |
| 10469151 | 0.036483 | 9.53E-04 | down | -1.99437 | -0.99593 | 113.355  | 224.6681 | Itih5            | 209378                                                                                                                                                                       | inter-alpha (globulin) inhibitor H5                                        |
| 10589889 | 0.036634 | 9.59E-04 | up   | 1.32484  | 0.405818 | 804.3965 | 607.1841 | Glb1             | 12091                                                                                                                                                                        | galactosidase, beta 1                                                      |
| 10357594 | 0.036645 | 9.62E-04 | up   | 1.482093 | 0.567636 | 606.6198 | 408.4627 | Rassf5           | 54354                                                                                                                                                                        | Ras association (RalGDS/AF-6) domain family member 5                       |
| 10379228 | 0.036645 | 9.64E-04 | up   | 1.915092 | 0.937414 | 334.3857 | 172.2292 | Nos2             | 18126                                                                                                                                                                        | nitric oxide synthase 2, inducible                                         |
| 10481634 | 0.036645 | 9.64E-04 | down | -1.46409 | -0.55    | 271.9506 | 397.6848 | Slc25a25 t227731 | 7 solute carrier family 25 (mitochondrial carrier, phosphate carrier), member 25   nuclear apoptosis inducing factor 1                                                       |                                                                            |
| 10504831 | 0.036645 | 9.63E-04 | down | -1.37244 | -0.45674 | 315.4584 | 433.2731 | Sec61b           | 66212                                                                                                                                                                        | Sec61 beta subunit                                                         |
| 10584615 | 0.036646 | 9.65E-04 | down | -1.40866 | -0.49432 | 1037.352 | 1462.258 | Pvr1             | 58235                                                                                                                                                                        | poliovirus receptor-related 1                                              |
| 10589685 | 0.036646 | 9.67E-04 | up   | 1.687522 | 0.754907 | 171.0499 | 100.9268 | Lrrc2            | 74249                                                                                                                                                                        | leucine rich repeat containing 2                                           |
| 10450996 | 0.036743 | 9.70E-04 | down | -1.61094 | -0.6879  | 146.3056 | 237.1146 | Gpr111           | 435529                                                                                                                                                                       | G protein-coupled receptor 111                                             |
| 10406419 | 0.036761 | 9.72E-04 | down | -1.33096 | -0.41247 | 518.6499 | 690.2587 | Lysmd3           | 80289                                                                                                                                                                        | LysM, putative peptidoglycan-binding, domain containing 3                  |
| 10409804 | 0.036801 | 9.81E-04 | down | -1.36985 | -0.45402 | 799.3076 | 1095.053 | Zcchc6           | 214290                                                                                                                                                                       | zinc finger, CCHC domain containing 6                                      |
| 10436372 | 0.036801 | 9.78E-04 | up   | 1.345247 | 0.427871 | 495.8864 | 368.685  | Dcblid2          | 73379                                                                                                                                                                        | discoidin, CUB and LCLL domain containing 2                                |
| 10490248 | 0.036801 | 9.80E-04 | up   | 1.387166 | 0.47214  | 106.8707 | 77.09571 |                  |                                                                                                                                                                              |                                                                            |
| 10493916 | 0.036801 | 9.81E-04 | down | -1.63872 | -0.71257 | 54.2815  | 89.42228 | Flg2             | 229574                                                                                                                                                                       | filaggrin family member 2                                                  |
| 10533725 | 0.036801 | 9.75E-04 | down | -1.61086 | -0.68784 | 92.88226 | 149.9031 | Gpr81            | 243270                                                                                                                                                                       | G protein-coupled receptor 81                                              |
| 10587818 | 0.036801 | 9.77E-04 | down | -1.52069 | -0.60472 | 121.1549 | 184.0675 | Plscr4           | 235527                                                                                                                                                                       | phospholipid scramblase 4                                                  |
| 10383198 | 0.036844 | 9.85E-04 | up   | 1.45042  | 0.53647  | 701.2534 | 483.8622 |                  |                                                                                                                                                                              |                                                                            |
| 10541279 | 0.036844 | 9.84E-04 | down | -1.32588 | -0.40695 | 754.2251 | 1000.181 | Bcl2l13          | 94044                                                                                                                                                                        | BCL2-like 13 (apoptosis facilitator)                                       |
| 10531887 | 0.036904 | 9.87E-04 | down | -1.71762 | -0.78041 | 559.5764 | 952.8117 | Slc10a6          | 75750                                                                                                                                                                        | solute carrier family 10 (sodium/bile acid cotransporter family), member 6 |
| 10587107 | 0.036909 | 9.89E-04 | down | -1.40574 | -0.49133 | 618.4041 | 868.4818 | Myo5a            | 17918                                                                                                                                                                        | myosin VA                                                                  |

|          |          |          |      |          |          |          |          |             |                                                                                                    |
|----------|----------|----------|------|----------|----------|----------|----------|-------------|----------------------------------------------------------------------------------------------------|
| 10564290 | 0.036953 | 9.91E-04 | down | -1.33032 | -0.41177 | 479.7871 | 638.4319 | Klf13       | 50794 Kruppel-like factor 13                                                                       |
| 10399696 | 0.036956 | 9.94E-04 | up   | 1.338002 | 0.42008  | 604.911  | 451.9668 | Rnf144a     | 108089 ring finger protein 144A                                                                    |
| 10564713 | 0.036956 | 9.93E-04 | up   | 1.33088  | 0.41238  | 2556.016 | 1920.27  | Mfge8       | 17304 milk fat globule-EGF factor 8 protein                                                        |
| 10597758 | 0.036956 | 9.95E-04 | down | -1.38789 | -0.4729  | 772.9619 | 1074.209 | Csrnp1      | 215418 cysteine-serine-rich nuclear protein 1                                                      |
| 10436623 | 0.036987 | 9.97E-04 | down | -2.49487 | -1.31897 | 90.02707 | 218.5936 | Chodl       | 246048 chondrolectin                                                                               |
| 10593856 | 0.037197 | 0.001004 | up   | 1.409089 | 0.494762 | 2405.351 | 1709.065 | C230081A1   | 244895 RIKEN cDNA C230081A13 gene                                                                  |
| 10460498 | 0.037541 | 0.001016 | up   | 1.324346 | 0.40528  | 257.1676 | 194.1909 | Slc29a2     | 13340 solute carrier family 29 (nucleoside transporters), member 2                                 |
| 10570432 | 0.037541 | 0.001016 | down | -1.34214 | -0.42454 | 409.0677 | 549.0422 | Snora3      | 1E+08 small nucleolar RNA, H/ACA box 3                                                             |
| 10459071 | 0.037549 | 0.001019 | down | -1.48929 | -0.57462 | 650.6039 | 971.4286 | 2010002N0   | 106878 RIKEN cDNA 2010002N04 gene                                                                  |
| 10499937 | 0.037549 | 0.00102  | up   | 1.727135 | 0.788381 | 4831.785 | 2782.048 |             |                                                                                                    |
| 10515960 | 0.037549 | 0.00102  | up   | 1.446957 | 0.533022 | 197.546  | 136.8288 | Kcnq4       | 60613 potassium voltage-gated channel, subfamily Q, member 4                                       |
| 10393936 | 0.037692 | 0.001026 | down | -1.31632 | -0.39651 | 183.365  | 241.3729 | Cbr2        | 12409 carbonyl reductase 2                                                                         |
| 10443786 | 0.037711 | 0.001027 | down | -1.3354  | -0.41727 | 75.06699 | 100.206  | Pde9a       | 18585 phosphodiesterase 9A                                                                         |
| 10502772 | 0.037738 | 0.001034 | down | -1.53183 | -0.61526 | 1003.135 | 1529.996 | Lphn2       | 99633 latrophilin 2                                                                                |
| 10513139 | 0.037738 | 0.001035 | down | -1.31472 | -0.39476 | 255.6038 | 336.0317 | Ptpn3       | 545622 protein tyrosine phosphatase, non-receptor type 3                                           |
| 10521824 | 0.037738 | 0.001031 | up   | 1.830401 | 0.87216  | 1453.454 | 789.7732 | Sod3        | 20657 superoxide dismutase 3, extracellular                                                        |
| 10593723 | 0.037738 | 0.001033 | down | -1.58206 | -0.6618  | 703.2165 | 1109.308 | Acsbg1      | 94180 acyl-CoA synthetase bubblegum family member 1                                                |
| 10604505 | 0.037738 | 0.001032 | down | -1.41318 | -0.49895 | 491.1472 | 694.2476 | 6720401G1   | 103012 RIKEN cDNA 6720401G13 gene                                                                  |
| 10376803 | 0.037764 | 0.001037 | down | -1.70285 | -0.76795 | 303.6067 | 513.8813 | Fam83g      | 69640 family with sequence similarity 83, member G                                                 |
| 10402575 | 0.037764 | 0.001038 | up   | 2.22606  | 1.154492 | 734.9857 | 325.665  | Degs2       | 70059 degenerative spermatocyte homolog 2 (Drosophila), lipid desaturase                           |
| 10407803 | 0.037792 | 0.001041 | down | -1.31608 | -0.39624 | 676.9969 | 891.0414 | Gpr137b     | 83924 G protein-coupled receptor 137B                                                              |
| 10587446 | 0.037792 | 0.001041 | up   | 1.437294 | 0.523355 | 881.9406 | 612.4264 | Myo6        | 17920 myosin VI                                                                                    |
| 10575021 | 0.037946 | 0.001049 | down | -1.32772 | -0.40895 | 241.1119 | 320.1108 | Zfp90       | 22751 zinc finger protein 90                                                                       |
| 10587226 | 0.037946 | 0.00105  | down | -1.44912 | -0.53517 | 176.3451 | 256.0898 | Lysmd2      | 70082 LysM, putative peptidoglycan-binding, domain containing 2                                    |
| 10606654 | 0.037946 | 0.001049 | down | -1.46843 | -0.55427 | 450.4839 | 659.5172 | Xkrx        | 331524 X Kell blood group precursor related X linked                                               |
| 10356329 | 0.037949 | 0.001051 | down | -1.47815 | -0.56379 | 206.5473 | 305.2262 | Ncl         | 17975 nucleolin                                                                                    |
| 10527963 | 0.038034 | 0.001055 | up   | 1.439181 | 0.525248 | 69.61709 | 48.43439 | Gm10484     | 1E+08 predicted gene 10484                                                                         |
| 10485170 | 0.038114 | 0.001058 | down | -1.33181 | -0.41339 | 369.9893 | 492.8622 | Cry2        | 12953 cryptochrome 2 (photolyase-like)                                                             |
| 10394954 | 0.038288 | 0.001064 | down | -1.52719 | -0.61088 | 527.5192 | 802.1388 | Grlh1       | 195733 grainyhead-like 1 (Drosophila)                                                              |
| 10373912 | 0.038344 | 0.001072 | down | -1.3658  | -0.44975 | 79.38937 | 108.3639 | Osm         | 18413 oncostatin M                                                                                 |
| 10395389 | 0.038344 | 0.001069 | down | -1.5645  | -0.6457  | 74.73895 | 116.3278 | Sostdc1     | 66042 sclerostin domain containing 1                                                               |
| 10485081 | 0.038344 | 0.001072 | down | -1.41634 | -0.50216 | 390.3834 | 553.5827 | Dgkz        | 104418 diacylglycerol kinase zeta                                                                  |
| 10517250 | 0.038344 | 0.001073 | down | -1.32405 | -0.40496 | 134.9412 | 178.6394 | Extl1       | 56219 exostosin (multiple)-like 1                                                                  |
| 10541614 | 0.038344 | 0.001069 | down | -1.56084 | -0.64233 | 229.9792 | 358.1011 | Clec4d      | 17474 C-type lectin domain family 4, member d                                                      |
| 10364102 | 0.038369 | 0.001076 | down | -1.50186 | -0.58675 | 1324.28  | 1991.443 | Chchd10     | 103172 coiled-coil-helix-coiled-coil-helix domain containing 10                                    |
| 10572109 | 0.038369 | 0.001075 | down | -1.40716 | -0.49279 | 253.5458 | 356.424  | Ints10      | 70885 integrator complex subunit 10                                                                |
| 10385500 | 0.038371 | 0.001077 | up   | 1.502815 | 0.587667 | 123.9622 | 82.17957 | Irgm1       | 15944 immunity-related GTPase family M member 1                                                    |
| 10551638 | 0.038436 | 0.00108  | down | -1.72499 | -0.78658 | 5048.294 | 8658.226 | Lgals7      | 16858 lectin, galactose binding, soluble 7                                                         |
| 10479217 | 0.038617 | 0.001087 | up   | 1.364837 | 0.448728 | 522.9302 | 382.7618 | Gm14420     | 628308 predicted gene 14420                                                                        |
| 10405587 | 0.038745 | 0.001092 | down | -1.56776 | -0.64871 | 2955.244 | 4624.658 | Tgfb1       | 21810 transforming growth factor, beta induced                                                     |
| 10514791 | 0.038745 | 0.001093 | up   | 1.359957 | 0.443561 | 219.7911 | 161.6174 | Pcsk9       | 100102 proprotein convertase subtilisin/kexin type 9                                               |
| 10585249 | 0.038745 | 0.001095 | down | -1.37077 | -0.45498 | 611.8993 | 838.9373 | Ppp2r1b     | 73699 protein phosphatase 2 (formerly 2A), regulatory subunit A (PR 65), beta isoform              |
| 10428310 | 0.038746 | 0.001096 | down | -1.32489 | -0.40588 | 602.7384 | 798.7593 | Azin1       | 54375 antizyme inhibitor 1                                                                         |
| 10530269 | 0.038759 | 0.001098 | down | -1.43294 | -0.51897 | 153.393  | 219.9088 | Rbm47       | 245945 RNA binding motif protein 47                                                                |
| 10603492 | 0.038759 | 0.001099 | down | -1.3703  | -0.4545  | 1563.818 | 2140.475 | Porcn       | 53627 porcupine homolog (Drosophila)                                                               |
| 10389151 | 0.038776 | 0.001101 | up   | 1.473284 | 0.559035 | 109.6814 | 74.26133 | Sifn10 Sifn | 237887   2 schlafen 10   schlafen 8                                                                |
| 10528484 | 0.038801 | 0.001103 | down | -1.38564 | -0.47055 | 692.995  | 958.8408 | Srpk2       | 20817 serine/arginine-rich protein specific kinase 2                                               |
| 10352827 | 0.03881  | 0.001107 | down | -1.74744 | -0.80524 | 147.6228 | 258.5957 | A13001011   | 319266 RIKEN cDNA A130010115 gene                                                                  |
| 10462618 | 0.03881  | 0.001106 | up   | 1.378321 | 0.462912 | 75.30427 | 54.5653  | Ifit3       | 15959 interferon-induced protein with tetratricopeptide repeats 3                                  |
| 10557585 | 0.03881  | 0.001105 | up   | 1.328849 | 0.410177 | 120.7016 | 90.8115  | Zfp553      | 233887 zinc finger protein 553                                                                     |
| 10398727 | 0.038926 | 0.001119 | up   | 1.354868 | 0.438152 | 1676.747 | 1237.295 | Klc1        | 16593 kinesin light chain 1                                                                        |
| 10407120 | 0.038926 | 0.001115 | down | -1.50338 | -0.58821 | 720.5557 | 1081.246 | Rps3a Gm'   | 20091   66 ribosomal protein S3A   predicted gene 9000                                             |
| 10416057 | 0.038926 | 0.001117 | down | -1.49429 | -0.57946 | 726.535  | 1081.655 | Clu         | 12759 clusterin                                                                                    |
| 10436239 | 0.038926 | 0.001114 | down | -1.34319 | -0.42566 | 728.4023 | 979.0187 | 2310061J0   | 66391   27 RIKEN cDNA 2310061J03 gene   zinc finger and BTB domain containing 11                   |
| 10530819 | 0.038926 | 0.001118 | up   | 1.510919 | 0.595426 | 1263.015 | 837.1071 | Hopx        | 74318 HOP homeobox                                                                                 |
| 10586397 | 0.038926 | 0.001114 | up   | 1.382614 | 0.467398 | 328.5432 | 237.8748 | Mtfmt       | 69606 mitochondrial methionyl-tRNA formyltransferase                                               |
| 10556206 | 0.039006 | 0.001122 | down | -1.34353 | -0.42603 | 405.4762 | 545.0114 | Snora3      | 1E+08 small nucleolar RNA, H/ACA box 3                                                             |
| 10349404 | 0.039104 | 0.001126 | down | -1.33766 | -0.41971 | 346.5681 | 463.4329 | Mgat5       | 107895 mannoside acetylglucosaminyltransferase 5                                                   |
| 10564909 | 0.039341 | 0.001135 | down | -1.31182 | -0.39157 | 1073.685 | 1408.59  | Man2a2      | 140481 mannosidase 2, alpha 2                                                                      |
| 10396608 | 0.039494 | 0.001114 | down | -1.34154 | -0.42389 | 685.0832 | 919.0986 | Syne2       | 319565 synaptic nuclear envelope 2                                                                 |
| 10349752 | 0.039512 | 0.001143 | down | -1.32465 | -0.40561 | 660.5954 | 874.9391 | Elk4 Mfsd'  | 13714   21 ELK4, member of ETS oncogene family   major facilitator superfamily domain containing 4 |
| 10562605 | 0.039512 | 0.001145 | down | -1.31981 | -0.40033 | 92.9476  | 122.6994 | A1987944    | 233168                                                                                             |
| 10567086 | 0.039512 | 0.001145 | up   | 1.370401 | 0.454598 | 68.50576 | 49.99722 | Cyp2r1      | 244209 cytochrome P450, family 2, subfamily r, polypeptide 1                                       |
| 10579468 | 0.039574 | 0.001148 | up   | 1.358271 | 0.441772 | 126.4414 | 93.18193 | Haus8       | 76478 4HAUS augmin-like complex, subunit 8                                                         |
| 10380699 | 0.039826 | 0.001157 | up   | 1.549546 | 0.631846 | 1785.941 | 1151.379 | Copz2       | 56358 coatomer protein complex, subunit zeta 2                                                     |

|          |          |          |      |          |          |          |          |                                                                                                                                                                                       |        |                                                                                              |
|----------|----------|----------|------|----------|----------|----------|----------|---------------------------------------------------------------------------------------------------------------------------------------------------------------------------------------|--------|----------------------------------------------------------------------------------------------|
| 10467730 | 0.040342 | 0.001173 | down | -1.32156 | -0.40224 | 236.9398 | 313.2033 | Morn4                                                                                                                                                                                 | 226123 | MORN repeat containing 4                                                                     |
| 10524082 | 0.04053  | 0.00118  | up   | 1.398157 | 0.483526 | 134.7459 | 96.19706 | 2310001H169504   10 RIKEN cDNA 2310001H12 gene   hypothetical protein LOC100044193   similar to novel KRAB box and zinc finger, C2H2 type domain containing protein                   |        |                                                                                              |
| 10360187 | 0.040611 | 0.001184 | down | -1.37476 | -0.45918 | 350.1148 | 481.674  | Vangl2                                                                                                                                                                                | 93840  | vang-like 2 (van gogh, Drosophila)                                                           |
| 10432636 | 0.040698 | 0.001189 | down | -1.40329 | -0.48881 | 352.2515 | 493.6071 | BC004728                                                                                                                                                                              | 207818 |                                                                                              |
| 10449266 | 0.040698 | 0.001189 | down | -1.3642  | -0.44805 | 1214.32  | 1657.753 | Itfg3                                                                                                                                                                                 | 106581 | integrin alpha FG-GAP repeat containing 3                                                    |
| 10460251 | 0.040765 | 0.001195 | down | -2.2795  | -1.18872 | 160.4064 | 364.4302 | 1700055NC                                                                                                                                                                             | 73458  | RIKEN cDNA 1700055N04 gene                                                                   |
| 10585778 | 0.040765 | 0.001195 | up   | 1.614407 | 0.691005 | 1005.687 | 627.2751 | Sema7a                                                                                                                                                                                | 20361  | sema domain, immunoglobulin domain (Ig), and GPI membrane anchor, (semaphorin) 7A            |
| 10589329 | 0.040765 | 0.001194 | up   | 1.325984 | 0.407063 | 315.0906 | 237.6686 | Pfkfb4                                                                                                                                                                                | 270198 | 6-phosphofructo-2-kinase/fructose-2,6-biphosphatase 4                                        |
| 10430140 | 0.040768 | 0.001197 | up   | 2.021872 | 1.015691 | 1401.733 | 705.2125 | Mb                                                                                                                                                                                    | 17189  | myoglobin                                                                                    |
| 10348244 | 0.040786 | 0.001201 | down | -1.3035  | -0.38239 | 108.7942 | 141.8084 | Inpp5d                                                                                                                                                                                | 16331  | inositol polyphosphate-5-phosphatase D                                                       |
| 10378367 | 0.040786 | 0.001201 | down | -1.698   | -0.76383 | 250.7584 | 424.0182 | Trpv3                                                                                                                                                                                 | 246788 | transient receptor potential cation channel, subfamily V, member 3                           |
| 10437655 | 0.040786 | 0.001203 | up   | 1.332697 | 0.414349 | 148.3872 | 111.2904 | Fam18a                                                                                                                                                                                | 383103 | family with sequence similarity 18, member A                                                 |
| 10572647 | 0.040786 | 0.001205 | down | -1.48644 | -0.57186 | 599.9131 | 894.8044 | Slc27a1                                                                                                                                                                               | 26457  | solute carrier family 27 (fatty acid transporter), member 1                                  |
| 10588201 | 0.040786 | 0.001202 | down | -1.34555 | -0.4282  | 81.56208 | 109.7736 |                                                                                                                                                                                       |        |                                                                                              |
| 10441610 | 0.04082  | 0.001207 | up   | 1.309126 | 0.388604 | 500.6167 | 382.3544 | Rshl2a   Rsh 66832   10 radial spokehead-like 2A   radial spokehead-like 2B                                                                                                           |        |                                                                                              |
| 10505489 | 0.04082  | 0.001209 | down | -1.46924 | -0.55507 | 840.7814 | 1238.627 | Pappa                                                                                                                                                                                 | 18491  | pregnancy-associated plasma protein A                                                        |
| 10508012 | 0.04082  | 0.00121  | down | -1.43074 | -0.51676 | 367.4833 | 524.8034 | Rspo1                                                                                                                                                                                 | 192199 | R-spondin homolog (Xenopus laevis)                                                           |
| 10419563 | 0.040824 | 0.001211 | down | -1.76978 | -0.82357 | 364.9209 | 638.828  | Rnase1                                                                                                                                                                                | 19752  | ribonuclease, RNase A family, 1 (pancreatic)                                                 |
| 10416302 | 0.040863 | 0.001217 | down | -1.35798 | -0.44146 | 1067.853 | 1450.545 | Hr                                                                                                                                                                                    | 15460  | hairless                                                                                     |
| 10430519 | 0.040863 | 0.001216 | up   | 1.37048  | 0.454681 | 3440.8   | 2507.671 | Csnk1e                                                                                                                                                                                | 27373  | casein kinase 1, epsilon                                                                     |
| 10523260 | 0.040863 | 0.001218 | down | -1.33214 | -0.41375 | 303.9292 | 404.8091 | Shroom3                                                                                                                                                                               | 27428  | shroom family member 3                                                                       |
| 10540248 | 0.040863 | 0.001218 | down | -1.43921 | -0.52527 | 579.2437 | 831.897  | Mitf                                                                                                                                                                                  | 17342  | microphthalmia-associated transcription factor                                               |
| 10479228 | 0.040871 | 0.00122  | up   | 1.349622 | 0.432556 | 651.843  | 483.3649 | Etoh1                                                                                                                                                                                 | 626848 | ethanol induced 1                                                                            |
| 10543031 | 0.041047 | 0.001227 | down | -1.3112  | -0.39089 | 206.8896 | 271.2438 | Slc25a13                                                                                                                                                                              | 50799  | solute carrier family 25 (mitochondrial carrier, adenine nucleotide translocator), member 13 |
| 10434934 | 0.04119  | 0.001234 | down | -1.55604 | -0.63788 | 195.2574 | 305.4843 | Bdh1                                                                                                                                                                                  | 71911  | 3-hydroxybutyrate dehydrogenase, type 1                                                      |
| 10518346 | 0.04119  | 0.001232 | up   | 1.313415 | 0.393323 | 1634.688 | 1244.66  | Gm13251   433791   7 predicted gene 13251   RIKEN cDNA 1700029I01 gene   predicted gene, OTTMUSG00000010657   predicted gene 13051   predicted gene 13159   predicted gene 13235   p1 |        |                                                                                              |
| 10517421 | 0.041247 | 0.001237 | up   | 1.318607 | 0.399015 | 2194.486 | 1663.925 | Pncr2                                                                                                                                                                                 | 52830  | proline-rich nuclear receptor coactivator 2                                                  |
| 10454353 | 0.041489 | 0.001247 | down | -1.30457 | -0.38357 | 267.3237 | 348.7721 | Mocos                                                                                                                                                                                 | 68591  | molybdenum cofactor sulfuryase                                                               |
| 10577882 | 0.041489 | 0.001246 | up   | 1.339728 | 0.42194  | 1209.563 | 902.1892 | Hgsnat                                                                                                                                                                                | 52120  | heparan-alpha-glucosaminide N-acetyltransferase                                              |
| 10489429 | 0.041608 | 0.001253 | down | -2.21388 | -1.14658 | 476.2683 | 1032.408 | Wfdc5                                                                                                                                                                                 | 209232 | WAP four-disulfide core domain 5                                                             |
| 10548761 | 0.041608 | 0.001253 | down | -1.54679 | -0.62928 | 181.4084 | 279.1686 | Hebp1                                                                                                                                                                                 | 15199  | heme binding protein 1                                                                       |
| 10419676 | 0.041927 | 0.001266 | down | -1.33545 | -0.41732 | 257.7936 | 344.5089 | Rab2b                                                                                                                                                                                 | 76338  | RAB2B, member RAS oncogene family                                                            |
| 10487890 | 0.041927 | 0.001265 | down | -2.96761 | -1.5693  | 235.0559 | 664.3408 | Erv3                                                                                                                                                                                  | 71995  | endogenous retroviral sequence 3                                                             |
| 10501208 | 0.041948 | 0.00127  | down | -1.74648 | -0.80445 | 56.04937 | 98.89374 | Gstm6                                                                                                                                                                                 | 14867  | glutathione S-transferase, mu 6                                                              |
| 10563178 | 0.041948 | 0.001269 | down | -1.30847 | -0.38788 | 156.0521 | 204.158  | Cd37                                                                                                                                                                                  | 12493  | CD37 antigen                                                                                 |
| 10571214 | 0.041948 | 0.001271 | down | -1.52558 | -0.60935 | 1425.913 | 2174.932 | Rnf122                                                                                                                                                                                | 68867  | ring finger protein 122                                                                      |
| 10364280 | 0.041974 | 0.001273 | up   | 1.323044 | 0.403861 | 2631.215 | 1988.408 | Pttg1ip                                                                                                                                                                               | 108705 | pituitary tumor-transforming 1 interacting protein                                           |
| 10508917 | 0.042144 | 0.00128  | up   | 1.405646 | 0.491233 | 601.5079 | 428.8096 | Aim1l                                                                                                                                                                                 | 230806 | absent in melanoma 1-like                                                                    |
| 10543551 | 0.042325 | 0.001287 | up   | 1.386917 | 0.471881 | 462.8152 | 333.6157 | Rbm28                                                                                                                                                                                 | 68272  | RNA binding motif protein 28                                                                 |
| 10539263 | 0.042358 | 0.001289 | up   | 1.631521 | 0.706217 | 589.1428 | 363.2252 | Loxl3                                                                                                                                                                                 | 16950  | lysyl oxidase-like 3                                                                         |
| 10356461 | 0.042397 | 0.001295 | up   | 1.516254 | 0.600511 | 631.733  | 414.6803 | Hjurp   643   381280   7 Holliday junction recognition protein   RIKEN cDNA 6430706D22 gene                                                                                           |        |                                                                                              |
| 10358677 | 0.042397 | 0.001301 | up   | 1.304847 | 0.38388  | 224.1387 | 171.7688 | 1200016B1                                                                                                                                                                             | 66875  | RIKEN cDNA 1200016B10 gene                                                                   |
| 10363118 | 0.042397 | 0.001298 | down | -1.32648 | -0.4076  | 386.4546 | 512.4317 | Dcbl1                                                                                                                                                                                 | 66686  | discoidin, CUB and LCCL domain containing 1                                                  |
| 10441339 | 0.042397 | 0.0013   | up   | 1.522597 | 0.606534 | 361.2297 | 237.3161 | A630089N                                                                                                                                                                              | 320586 | RIKEN cDNA A630089N07 gene                                                                   |
| 10444079 | 0.042397 | 0.001297 | down | -1.34134 | -0.42368 | 407.8758 | 547.4163 | Rgl2                                                                                                                                                                                  | 19732  | ral guanine nucleotide dissociation stimulator-like 2                                        |
| 10542740 | 0.042397 | 0.001299 | up   | 1.420069 | 0.505961 | 286.9982 | 201.8647 | Sspn                                                                                                                                                                                  | 16651  | sarcospan                                                                                    |
| 10593219 | 0.042397 | 0.001297 | up   | 1.964354 | 0.974055 | 744.2852 | 373.8264 | Nnmt                                                                                                                                                                                  | 18113  | nicotinamide N-methyltransferase                                                             |
| 10381939 | 0.042633 | 0.001309 | down | -1.30382 | -0.38274 | 443.1466 | 577.8686 | Tanc2                                                                                                                                                                                 | 77097  | tetratricopeptide repeat, ankyrin repeat and coiled-coil containing 2                        |
| 10544036 | 0.042801 | 0.001318 | down | -1.41775 | -0.5036  | 348.1702 | 493.4807 | Atp6v0a4   140494   3 ATPase, H+ transporting, lysosomal V0 subunit A4   RIKEN cDNA D630045J12 gene                                                                                   |        |                                                                                              |
| 10572755 | 0.042801 | 0.001316 | down | -1.30181 | -0.38052 | 47.01434 | 61.20997 |                                                                                                                                                                                       |        |                                                                                              |
| 10537062 | 0.042855 | 0.001321 | down | -1.57163 | -0.65226 | 573.8581 | 905.6186 | Mest                                                                                                                                                                                  | 17294  | mesoderm specific transcript                                                                 |
| 10526427 | 0.043034 | 0.001328 | down | -1.42191 | -0.50783 | 358.3933 | 510.0926 | Dtx2                                                                                                                                                                                  | 74198  | deltex 2 homolog (Drosophila)                                                                |
| 10420988 | 0.043292 | 0.001337 | up   | 1.346274 | 0.428972 | 2236.737 | 1663.014 | Dpysl2                                                                                                                                                                                | 12934  | dihydropyrimidinase-like 2                                                                   |
| 10414612 | 0.043327 | 0.00134  | down | -1.9721  | -0.97973 | 321.6298 | 628.1682 | Slc39a2                                                                                                                                                                               | 214922 | solute carrier family 39 (zinc transporter), member 2                                        |
| 10561831 | 0.043476 | 0.001346 | up   | 1.30673  | 0.385961 | 162.2444 | 124.1315 | Zfp566   Zfp 72556   33 zinc finger protein 566   zinc finger protein 82                                                                                                              |        |                                                                                              |
| 10395659 | 0.043623 | 0.001355 | down | -1.57922 | -0.65921 | 134.7613 | 213.6419 | Coch                                                                                                                                                                                  | 12810  | coagulation factor C homolog (Limulus polyphemus)                                            |
| 10478048 | 0.043623 | 0.001354 | down | -3.67163 | -1.87642 | 578.5673 | 1987.823 | Lbp                                                                                                                                                                                   | 16803  | lipopolysaccharide binding protein                                                           |
| 10502830 | 0.043623 | 0.001354 | up   | 1.568872 | 0.649727 | 145.9852 | 92.5323  | Nexn                                                                                                                                                                                  | 68810  | nexilin                                                                                      |
| 10581151 | 0.043649 | 0.001357 | up   | 1.874228 | 0.906297 | 766.8777 | 413.9805 | Rrad                                                                                                                                                                                  | 56437  | Ras-related associated with diabetes                                                         |
| 10370180 | 0.043856 | 0.001367 | down | -1.3201  | -0.40065 | 1699.534 | 2242.972 | Col6a2                                                                                                                                                                                | 12834  | collagen, type VI, alpha 2                                                                   |
| 10376912 | 0.043856 | 0.001368 | up   | 1.470325 | 0.556135 | 114.7237 | 78.1875  | Fbxw10                                                                                                                                                                                | 213980 | F-box and WD-40 domain protein 10                                                            |
| 10531437 | 0.043856 | 0.001368 | down | -1.31663 | -0.39685 | 896.9537 | 1180.888 | Scarb2                                                                                                                                                                                | 12492  | scavenger receptor class B, member 2                                                         |
| 10360235 | 0.043878 | 0.001371 | up   | 2.213199 | 1.146133 | 400.4554 | 181.38   | Casq1                                                                                                                                                                                 | 12372  | calsequestrin 1                                                                              |
| 10537184 | 0.043878 | 0.001372 | up   | 1.470596 | 0.556401 | 2287.592 | 1549.886 | Cald1                                                                                                                                                                                 | 109624 | caldesmon 1                                                                                  |
| 10515943 | 0.043991 | 0.001377 | up   | 1.306533 | 0.385744 | 473.032  | 361.9568 | Ctps                                                                                                                                                                                  | 51797  | cytidine 5'-triphosphate synthase                                                            |

|          |          |          |      |          |          |          |          |                                                                                                                |        |                                                                             |
|----------|----------|----------|------|----------|----------|----------|----------|----------------------------------------------------------------------------------------------------------------|--------|-----------------------------------------------------------------------------|
| 10361682 | 0.044038 | 0.001382 | down | -1.34358 | -0.42608 | 429.962  | 578.0845 | Ppil4                                                                                                          | 67418  | peptidylprolyl isomerase (cyclophilin)-like 4                               |
| 10485635 | 0.044038 | 0.001381 | up   | 1.325486 | 0.406521 | 515.2904 | 388.6637 | Eif3m                                                                                                          | 98221  | eukaryotic translation initiation factor 3, subunit M                       |
| 10381260 | 0.044049 | 0.001388 | up   | 1.36491  | 0.448805 | 338.3759 | 248.2366 | Tubg2                                                                                                          | 103768 | tubulin, gamma 2                                                            |
| 10444268 | 0.044049 | 0.001388 | down | -1.34178 | -0.42415 | 291.5473 | 390.8941 | Tap2                                                                                                           | 21355  | transporter 2, ATP-binding cassette, sub-family B (MDR/TAP)                 |
| 10496425 | 0.044049 | 0.001387 | down | -1.48936 | -0.57469 | 136.9226 | 204.3032 | Adh7                                                                                                           | 11529  | alcohol dehydrogenase 7 (class IV), mu or sigma polypeptide                 |
| 10572637 | 0.044049 | 0.001385 | up   | 1.342804 | 0.425248 | 1262.446 | 940.1877 | Fam125a                                                                                                        | 73711  | family with sequence similarity 125, member A                               |
| 10380260 | 0.044114 | 0.001392 | up   | 1.611321 | 0.688244 | 669.2501 | 418.3634 | Trim25                                                                                                         | 217069 | tripartite motif-containing 25                                              |
| 10552917 | 0.044124 | 0.001395 | down | -1.33293 | -0.4146  | 141.4959 | 188.6136 | 1700039E1 76713   67 RIKEN cDNA 1700039E15 gene   ribosomal protein L14   ribosomal protein L14 pseudogene     |        |                                                                             |
| 10555848 | 0.044124 | 0.001394 | down | -1.42191 | -0.50783 | 85.46917 | 121.8386 | Trim6                                                                                                          | 94088  | tripartite motif-containing 6                                               |
| 10587639 | 0.044164 | 0.001398 | down | -1.34971 | -0.43265 | 3063     | 4132.572 | Nt5e                                                                                                           | 23959  | 5' nucleotidase, ecto                                                       |
| 10441422 | 0.044277 | 0.001404 | down | -1.33802 | -0.4201  | 401.1541 | 536.725  | Zdhhc14                                                                                                        | 224454 | zinc finger, DHHC domain containing 14                                      |
| 10456545 | 0.044277 | 0.001404 | down | -1.50655 | -0.59125 | 96.11539 | 144.667  | Ccdc68                                                                                                         | 381175 | coiled-coil domain containing 68                                            |
| 10466923 | 0.044279 | 0.001406 | down | -1.59498 | -0.67354 | 2258.476 | 3594.958 | Gm10136   672214   1 ribosomal protein L26 pseudogene                                                          |        |                                                                             |
| 10574384 | 0.044318 | 0.001409 | up   | 1.325612 | 0.406658 | 241.4337 | 182.082  | Ndr4                                                                                                           | 234593 | N-myc downstream regulated gene 4                                           |
| 10586357 | 0.044705 | 0.001423 | up   | 2.773478 | 1.471696 | 332.5773 | 114.659  | Cilp                                                                                                           | 214425 | cartilage intermediate layer protein, nucleotide pyrophosphohydrolase       |
| 10370522 | 0.044723 | 0.001426 | down | -1.48679 | -0.5722  | 956.0928 | 1415.399 | Casp14                                                                                                         | 12365  | caspase 14                                                                  |
| 10487994 | 0.044723 | 0.001425 | down | -1.49388 | -0.57907 | 695.153  | 1038.35  | Fermt1                                                                                                         | 21639  | fermitin family homolog 1 (Drosophila)                                      |
| 10348791 | 0.044727 | 0.001428 | down | -1.34192 | -0.4243  | 63.33916 | 85.05816 | Ano7                                                                                                           | 404545 | anoctamin 7                                                                 |
| 10359948 | 0.044778 | 0.001431 | down | -1.35525 | -0.43856 | 656.0822 | 889.6848 | Uap1                                                                                                           | 107652 | UDP-N-acetylglucosamine pyrophosphorylase 1                                 |
| 10352867 | 0.044851 | 0.001438 | down | -1.56198 | -0.64338 | 340.3835 | 528.3577 | Plxna2                                                                                                         | 18845  | plexin A2                                                                   |
| 10509280 | 0.044851 | 0.001437 | up   | 1.344552 | 0.427126 | 1814.437 | 1348.382 | Hspg2                                                                                                          | 15530  | perlecan (heparan sulfate proteoglycan 2)                                   |
| 10536658 | 0.044851 | 0.001436 | down | -1.43553 | -0.52158 | 122.1847 | 174.8782 | Wnt16                                                                                                          | 93735  | wingless-related MMTV integration site 16                                   |
| 10457007 | 0.044871 | 0.00144  | down | -1.34885 | -0.43173 | 227.3556 | 306.367  | Pqlc1   Gm9 66943   79 PQ loop repeat containing 1   predicted gene 9906                                       |        |                                                                             |
| 10574259 | 0.04508  | 0.001449 | down | -1.31638 | -0.39658 | 3524.188 | 4641.528 | Gpr56                                                                                                          | 14766  | G protein-coupled receptor 56                                               |
| 10354979 | 0.045101 | 0.001454 | up   | 1.32731  | 0.408505 | 277.5803 | 208.9795 | Als2                                                                                                           | 74018  | amyotrophic lateral sclerosis 2 (juvenile) homolog (human)                  |
| 10396205 | 0.045101 | 0.001459 | up   | 1.340998 | 0.423307 | 307.8103 | 229.7347 | Arid4a                                                                                                         | 238247 | AT rich interactive domain 4A (RBP1-like)                                   |
| 10507137 | 0.045101 | 0.001459 | down | -1.45691 | -0.54291 | 744.9989 | 1083.016 | Pdzk1ip1                                                                                                       | 67182  | PDZK1 interacting protein 1                                                 |
| 10530998 | 0.045101 | 0.001457 | down | -1.61564 | -0.6921  | 342.2482 | 555.949  | Tmprss11f                                                                                                      | 243083 | transmembrane protease, serine 11f                                          |
| 10564805 | 0.045101 | 0.001455 | down | -1.38967 | -0.47474 | 322.0679 | 448.4311 | Pex11a                                                                                                         | 18631  | peroxisomal biogenesis factor 11 alpha                                      |
| 10586017 | 0.045101 | 0.001454 | up   | 1.313648 | 0.393578 | 617.2942 | 470.1257 | Uaca                                                                                                           | 72565  | uveal autoantigen with coiled-coil domains and ankyrin repeats              |
| 10350039 | 0.04513  | 0.001462 | up   | 1.297857 | 0.376131 | 813.5393 | 626.7254 | Rabif                                                                                                          | 98710  | RAB interacting factor                                                      |
| 10584653 | 0.04513  | 0.001463 | down | -1.46799 | -0.55384 | 294.528  | 432.0084 | C1qtnf5   M235312   2 C1q and tumor necrosis factor related protein 5   membrane-type frizzled-related protein |        |                                                                             |
| 10373202 | 0.045153 | 0.001465 | up   | 1.304577 | 0.383582 | 1367.612 | 1048.219 | Shmt2                                                                                                          | 108037 | serine hydroxymethyltransferase 2 (mitochondrial)                           |
| 10476299 | 0.045174 | 0.001467 | up   | 1.329195 | 0.410553 | 354.2928 | 266.7582 |                                                                                                                |        |                                                                             |
| 10366519 | 0.045285 | 0.001474 | down | -1.30022 | -0.37876 | 75.081   | 97.59986 | 5330438D1                                                                                                      | 327824 | RIKEN cDNA 5330438D12 gene                                                  |
| 10582649 | 0.045285 | 0.001474 | up   | 1.34434  | 0.426898 | 109.7925 | 81.7375  | Pgbd5                                                                                                          | 209966 | piggyBac transposable element derived 5                                     |
| 10404380 | 0.045415 | 0.00148  | down | -1.39412 | -0.47935 | 1158.009 | 1611.117 | Dusp22                                                                                                         | 105352 | dual specificity phosphatase 22                                             |
| 10456392 | 0.045423 | 0.001482 | down | -1.34129 | -0.42362 | 516.0145 | 692.7062 | Cidea                                                                                                          | 12683  | cell death-inducing DNA fragmentation factor, alpha subunit-like effector A |
| 10430851 | 0.045465 | 0.001485 | down | -1.41163 | -0.50212 | 683.3184 | 965.5918 | Cyp2d22                                                                                                        | 56448  | cytochrome P450, family 2, subfamily d, polypeptide 22                      |
| 10595324 | 0.045571 | 0.00149  | down | -1.49438 | -0.57954 | 228.7223 | 341.667  | Htr1b                                                                                                          | 15551  | 5-hydroxytryptamine (serotonin) receptor 1B                                 |
| 10396511 | 0.045764 | 0.001499 | down | -1.28877 | -0.366   | 344.5494 | 444.0603 | Syne2                                                                                                          | 319565 | synaptic nuclear envelope 2                                                 |
| 10596481 | 0.045764 | 0.001499 | up   | 1.409416 | 0.495097 | 369.9385 | 262.9846 | Abhd14a                                                                                                        | 68644  | abhydrolase domain containing 14A                                           |
| 10512067 | 0.045795 | 0.001502 | up   | 1.344487 | 0.427056 | 618.2987 | 459.3771 | Ddx58                                                                                                          | 230073 | DEAD (Asp-Glu-Ala-Asp) box polypeptide 58                                   |
| 10360040 | 0.045816 | 0.001505 | down | -1.38488 | -0.46976 | 143.3146 | 198.1149 | Fcgr3                                                                                                          | 14131  | Fc receptor, IgG, low affinity III                                          |
| 10394749 | 0.045816 | 0.001506 | down | -1.44926 | -0.53531 | 204.4429 | 295.9887 | Nol10                                                                                                          | 217431 | nucleolar protein 10                                                        |
| 10424559 | 0.045988 | 0.001513 | up   | 1.355347 | 0.438662 | 192.9373 | 142.1557 | Khdrbs3                                                                                                        | 13992  | KH domain containing, RNA binding, signal transduction associated 3         |
| 10401172 | 0.046049 | 0.001518 | down | -1.49586 | -0.58098 | 321.3334 | 482.6972 | Vti1b                                                                                                          | 53612  | vesicle transport through interaction with t-SNAREs 1B homolog              |
| 10573203 | 0.046049 | 0.001518 | down | -1.42004 | -0.50593 | 673.4586 | 957.0988 | Gipc1                                                                                                          | 67903  | GIPC PDZ domain containing family, member 1                                 |
| 10407097 | 0.046157 | 0.001523 | down | -1.36274 | -0.44651 | 1014.358 | 1381.205 | Pde4d                                                                                                          | 238871 | phosphodiesterase 4D, cAMP specific                                         |
| 10349147 | 0.046185 | 0.001527 | down | -2.04866 | -1.03468 | 65.95695 | 133.7536 | Serpinh7                                                                                                       | 116872 | serine (or cysteine) peptidase inhibitor, clade B, member 7                 |
| 10519321 | 0.046185 | 0.001527 | down | -1.51305 | -0.59746 | 2728.317 | 4117.978 | Gm15772   100034726 ribosomal protein L26 pseudogene                                                           |        |                                                                             |
| 10415784 | 0.046234 | 0.001531 | down | -1.36332 | -0.44713 | 1045.858 | 1425.216 | Trim13                                                                                                         | 66597  | tripartite motif-containing 13                                              |
| 10508879 | 0.046237 | 0.001534 | up   | 1.351978 | 0.435072 | 536.4893 | 397.2391 | Fam46b                                                                                                         | 100342 | family with sequence similarity 46, member B                                |
| 10544523 | 0.046237 | 0.001534 | down | -1.46755 | -0.5534  | 127.722  | 187.0094 | Rny1                                                                                                           | 19872  | RNA, Y1 small cytoplasmic, Ro-associated                                    |
| 10404069 | 0.046273 | 0.001541 | up   | 1.349544 | 0.432472 | 269.8367 | 199.6913 | Hist1h1a                                                                                                       | 80838  | histone cluster 1, H1a                                                      |
| 10433536 | 0.046273 | 0.001542 | down | -1.28891 | -0.36615 | 418.4395 | 539.3232 | Clec16a                                                                                                        | 74374  | C-type lectin domain family 16, member A                                    |
| 10518300 | 0.046273 | 0.001537 | up   | 1.324003 | 0.404906 | 493.5619 | 372.7323 | Tnfrsf1b                                                                                                       | 21938  | tumor necrosis factor receptor superfamily, member 1b                       |
| 10598626 | 0.046273 | 0.001542 | down | -1.43802 | -0.52409 | 1129.716 | 1619.18  | Tspan7                                                                                                         | 21912  | tetraspanin 7                                                               |
| 10476545 | 0.04634  | 0.001545 | down | -1.48917 | -0.57451 | 112.0419 | 167.0464 | Sptlc3                                                                                                         | 228677 | serine palmitoyltransferase, long chain base subunit 3                      |
| 10364262 | 0.04688  | 0.001566 | down | -1.43467 | -0.52072 | 133.1151 | 190.3779 | Itgb2                                                                                                          | 16414  | integrin beta 2                                                             |
| 10443131 | 0.04688  | 0.001567 | down | -1.30113 | -0.37976 | 849.7315 | 1105.506 | Itp3                                                                                                           | 16440  | inositol 1,4,5-triphosphate receptor 3                                      |
| 10484503 | 0.04688  | 0.00157  | up   | 1.362786 | 0.446558 | 97.21409 | 71.27352 | Lrrc55                                                                                                         | 241528 | leucine rich repeat containing 55                                           |
| 10489246 | 0.04688  | 0.001569 | down | -1.81659 | -0.86123 | 412.7614 | 740.1893 | Mafb                                                                                                           | 16658  | v-maf musculoaponeurotic fibrosarcoma oncogene family, protein B (avian)    |
| 10499921 | 0.047007 | 0.001576 | up   | 1.889343 | 0.917884 | 778.0522 | 408.6096 | Lce1d                                                                                                          | 69611  | late cornified envelope 1D                                                  |
| 10588691 | 0.047047 | 0.001579 | down | -1.39722 | -0.48256 | 1098.417 | 1537.97  | Hyal1   Natf 15586   56 hyaluronoglucosaminidase 1   N-acetyltransferase 6                                     |        |                                                                             |

|          |          |          |      |          |          |          |          |                                                                                                                                                  |
|----------|----------|----------|------|----------|----------|----------|----------|--------------------------------------------------------------------------------------------------------------------------------------------------|
| 10392063 | 0.047087 | 0.001582 | up   | 1.296489 | 0.37461  | 957.4465 | 738.5748 | Limd2 Sm: 67803   83 LIM domain containing 2   SWI/SNF related, matrix associated, actin dependent regulator of chromatin, subfamily d, member 2 |
| 10508829 | 0.047536 | 0.001599 | up   | 1.323318 | 0.40416  | 295.1128 | 223.121  | Map3k6 53608 mitogen-activated protein kinase kinase kinase 6                                                                                    |
| 10595404 | 0.047571 | 0.001601 | down | -1.35167 | -0.43475 | 772.3046 | 1043.309 | Fam46a 212943 family with sequence similarity 46, member A                                                                                       |
| 10367717 | 0.047592 | 0.001604 | down | -1.38102 | -0.46574 | 917.9693 | 1267.036 | BC013529 215751                                                                                                                                  |
| 10368343 | 0.047899 | 0.001617 | down | -1.61603 | -0.69246 | 401.9778 | 654.6815 | Arg1 11846 arginase, liver                                                                                                                       |
| 10571241 | 0.047899 | 0.001617 | up   | 1.284846 | 0.361596 | 265.4673 | 206.6239 | Purg 75029 purine-rich element binding protein G                                                                                                 |
| 10489471 | 0.047965 | 0.001625 | down | -1.34802 | -0.43084 | 92.13826 | 124.2413 | Matn4 17183 matrilin 4                                                                                                                           |
| 10555297 | 0.047965 | 0.001622 | down | -1.80527 | -0.85221 | 63.07825 | 115.2002 | Kcne3 57442 potassium voltage-gated channel, Isk-related subfamily, gene 3                                                                       |
| 10600357 | 0.047965 | 0.001624 | down | -1.35345 | -0.43664 | 485.414  | 657.7478 | Taz 66826 tafazzin                                                                                                                               |
| 10400984 | 0.047997 | 0.001629 | down | -1.3529  | -0.43606 | 160.2889 | 217.0242 | Tmem30b 238257 transmembrane protein 30B                                                                                                         |
| 10478884 | 0.047997 | 0.001631 | up   | 1.288299 | 0.365468 | 1148.119 | 891.168  | Snai1 20613 snail homolog 1 (Drosophila)                                                                                                         |
| 10567171 | 0.047997 | 0.001629 | down | -1.53021 | -0.61373 | 214.2366 | 329.7354 | Rps13 68052 ribosomal protein S13                                                                                                                |
| 10380381 | 0.048083 | 0.001635 | up   | 1.314129 | 0.394106 | 2072.299 | 1575.992 | Tob1 22057 transducer of ErbB-2.1                                                                                                                |
| 10476252 | 0.048146 | 0.001641 | down | -1.31595 | -0.3961  | 167.3666 | 220.233  | Cdc25b 12531 cell division cycle 25 homolog B (S. pombe)                                                                                         |
| 10523134 | 0.048146 | 0.001642 | down | -1.53826 | -0.6213  | 441.1903 | 679.2973 | Pf4 56744 platelet factor 4                                                                                                                      |
| 10531931 | 0.048146 | 0.001639 | down | -1.7671  | -0.82138 | 187.1031 | 327.0449 | Sparcl1 13602 SPARC-like 1                                                                                                                       |
| 10586166 | 0.048162 | 0.001645 | down | -1.37772 | -0.46228 | 280.1991 | 386.7795 |                                                                                                                                                  |
| 10452613 | 0.048707 | 0.001665 | up   | 1.2979   | 0.37618  | 219.4091 | 169.0682 | Arhgap28 268970 Rho GTPase activating protein 28                                                                                                 |
| 10587880 | 0.048736 | 0.001668 | up   | 1.469099 | 0.554931 | 131.32   | 89.15618 | Pcolce2 76477 procollagen C-endopeptidase enhancer 2                                                                                             |
| 10408557 | 0.04878  | 0.001671 | down | -1.57234 | -0.65291 | 214.3742 | 339.1694 | Serp1nb1a 66222 serine (or cysteine) peptidase inhibitor, clade B, member 1a                                                                     |
| 10354374 | 0.049014 | 0.001686 | down | -1.87666 | -0.90817 | 334.0258 | 616.883  | Slc40a1 53945 solute carrier family 40 (iron-regulated transporter), member 1                                                                    |
| 10394786 | 0.049014 | 0.001693 | up   | 1.317365 | 0.397655 | 209.252  | 158.962  | 1700030C169513   23 RIKEN cDNA 1700030C10 gene   hypothetical protein LOC236260                                                                  |
| 10431210 | 0.049014 | 0.001694 | down | -1.40056 | -0.486   | 117.9513 | 165.6336 | Wnt7b 22422 wingless-related MMTV integration site 7B                                                                                            |
| 10449955 | 0.049014 | 0.001692 | up   | 1.363787 | 0.447619 | 573.0893 | 420.6456 | Cyp4f13 170716 cytochrome P450, family 4, subfamily f, polypeptide 13                                                                            |
| 10460253 | 0.049014 | 0.001693 | down | -1.62131 | -0.69716 | 2577.315 | 4144.125 | Aldh3b2 621603 aldehyde dehydrogenase 3 family, member B2                                                                                        |
| 10462406 | 0.049014 | 0.001689 | down | -1.29692 | -0.37509 | 1563.469 | 2027.534 | C030046E1 226089 RIKEN cDNA C030046E11 gene                                                                                                      |
| 10496405 | 0.049014 | 0.001682 | up   | 1.925001 | 0.944859 | 423.62   | 218.3583 | Gm5105 329763 predicted gene 5105                                                                                                                |
| 10497012 | 0.049014 | 0.001692 | down | -1.40274 | -0.48825 | 68.67232 | 96.53736 | 4922501L1 209601 RIKEN cDNA 4922501L14 gene                                                                                                      |
| 10524866 | 0.049014 | 0.001689 | down | -1.31889 | -0.39932 | 274.902  | 362.5114 | BC023744 231668                                                                                                                                  |
| 10468980 | 0.049041 | 0.001697 | up   | 1.34849  | 0.431345 | 233.2751 | 172.7748 | Fam107b 66540 family with sequence similarity 107, member B                                                                                      |
| 10601581 | 0.049041 | 0.001699 | down | -1.33637 | -0.41832 | 134.0061 | 178.8793 | 9230105E1 319236   6 RIKEN cDNA 9230105E10 gene   predicted gene 8833   predicted gene 4992                                                      |
| 10460400 | 0.049257 | 0.00171  | down | -1.3933  | -0.4785  | 390.4788 | 543.0163 | Pcx 18563 pyruvate carboxylase                                                                                                                   |
| 10480027 | 0.049257 | 0.001714 | down | -1.34193 | -0.42431 | 210.4795 | 282.2658 | Zbtb2 381990 zinc finger and BTB domain containing 2                                                                                             |
| 10505779 | 0.049257 | 0.001715 | down | -1.48363 | -0.56913 | 145.3938 | 215.8921 | Acer2 230379 alkaline ceramidase 2                                                                                                               |
| 10509441 | 0.049257 | 0.001711 | up   | 1.438185 | 0.52425  | 1572.849 | 1097.098 | Ece1 230857 endothelin converting enzyme 1                                                                                                       |
| 10540705 | 0.049257 | 0.001713 | down | -1.36257 | -0.44633 | 684.7842 | 933.5144 | Il17rc 171095 interleukin 17 receptor C                                                                                                          |
| 10481304 | 0.049307 | 0.001718 | up   | 1.288207 | 0.365364 | 144.2653 | 112.0096 | Gfi1b 14582 growth factor independent 1B                                                                                                         |
| 10447130 | 0.04933  | 0.001723 | down | -1.44338 | -0.52945 | 275.736  | 397.7856 | Pkdcc 106522 protein kinase domain containing, cytoplasmic                                                                                       |
| 10475866 | 0.04933  | 0.001724 | down | -1.49696 | -0.58204 | 357.3879 | 533.9146 | Bcl2l11 12125 BCL2-like 11 (apoptosis facilitator)                                                                                               |
| 10521759 | 0.04933  | 0.001721 | up   | 1.31786  | 0.398197 | 1026.398 | 779.4603 | Slit2 20563 slit homolog 2 (Drosophila)                                                                                                          |
| 10427628 | 0.049378 | 0.001727 | down | -1.3503  | -0.43328 | 154.3762 | 208.4588 | Il7r 16197 interleukin 7 receptor                                                                                                                |
| 10403081 | 0.049383 | 0.001733 | up   | 1.299296 | 0.37773  | 103.9721 | 80.01584 | Wdr60 217935 WD repeat domain 60                                                                                                                 |
| 10419370 | 0.049383 | 0.001731 | down | -1.33203 | -0.41363 | 596.3099 | 794.6001 | Exoc5 105504 exocyst complex component 5                                                                                                         |
| 10425335 | 0.049383 | 0.001731 | down | -1.3218  | -0.40251 | 318.3993 | 420.516  | Syng1 20972 synaptogyrin 1                                                                                                                       |
| 10373569 | 0.049682 | 0.001753 | down | -1.45942 | -0.5454  | 5062.022 | 7372.087 | Rpsa Gm9:16785   10 ribosomal protein SA   ribosomal protein SA pseudogene                                                                       |
| 10550451 | 0.049682 | 0.001747 | up   | 1.509916 | 0.594468 | 124.4947 | 82.27453 |                                                                                                                                                  |
| 10557960 | 0.049682 | 0.001752 | up   | 1.342109 | 0.424501 | 1097.069 | 817.8352 | Tgfb1i1 21804 transforming growth factor beta 1 induced transcript 1                                                                             |
| 10563108 | 0.049682 | 0.001755 | down | -1.37192 | -0.4562  | 344.7509 | 472.9459 | Snord35a 27211 small nucleolar RNA, C/D box 35A                                                                                                  |
| 10575074 | 0.049682 | 0.001754 | up   | 1.287196 | 0.364232 | 205.7771 | 159.894  | Tmco7 272538 transmembrane and coiled-coil domains 7                                                                                             |
| 10578324 | 0.049682 | 0.001747 | down | -1.32702 | -0.40819 | 205.7282 | 272.7287 | Mtus1 102103 mitochondrial tumor suppressor 1                                                                                                    |
| 10595793 | 0.049682 | 0.001749 | down | -1.31419 | -0.39417 | 2098.771 | 2758.24  | Atp1b3 11933 ATPase, Na+/K+ transporting, beta 3 polypeptide                                                                                     |
| 10382866 | 0.049992 | 0.001768 | down | -1.34789 | -0.4307  | 119.9313 | 161.8962 | Mgat5b 268510 mannoside acetylglucosaminyltransferase 5, isoenzyme B                                                                             |
